# Supplementary material for: Enantioselective conjugate addition of malonates to α,β-unsaturated aldehydes catalysed by 4-oxalocrotonate tautomerase
Source: Royal Society of Chemistry journal article supplement (doi:10.1039/d3ob00111c), 2023-01-01

## Supporting Information

### Enantioselective Conjugate Addition of Malonates to $\alpha,\beta$ -Unsaturated Aldehydes Catalyzed by 4-Oxalocrotonate Tautomerase

*Ming-Zhu Yu,<sup>1</sup> Kai-Yue Chen,<sup>1</sup> Yi-Bin Zhang,<sup>1</sup> Chang-Xuan Zhang,<sup>1</sup> and Zheng Xiang<sup>\*1,2,3</sup>*

<sup>1</sup>State Key Laboratory of Chemical Oncogenomics, Guangdong Provincial Key Laboratory of Chemical Genomics, School of Chemical Biology and Biotechnology, Peking University Shenzhen Graduate School, Shenzhen 518055, China. <sup>2</sup>Institute of Chemical Biology, Shenzhen Bay Laboratory, Shenzhen 518132, China. <sup>3</sup>AI for Science (AI4S) Preferred Program, Peking University Shenzhen Graduate School, Shenzhen 518055, China.

\*Email: zxiang@pku.edu.cn

#### Table of Contents

|                                      |     |
|--------------------------------------|-----|
| I. Supplementary schemes and figures | S2  |
| II. Materials and methods            | S2  |
| III. Chemical synthesis and analysis | S14 |
| IV. References                       | S25 |
| V. NMR spectra                       | S27 |

## I. Supplementary figures

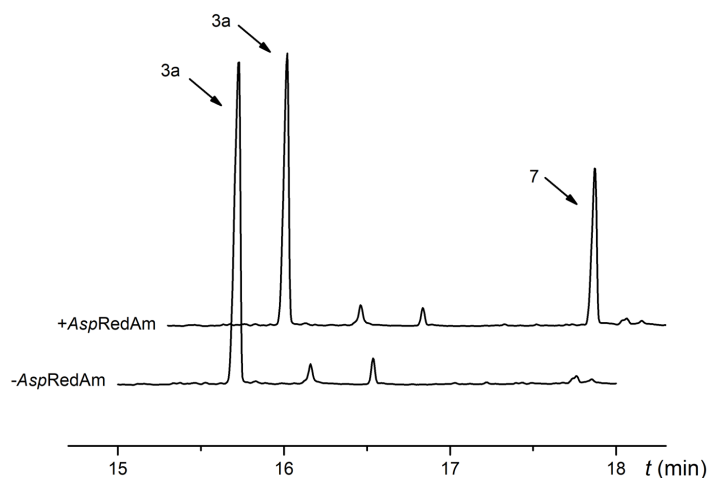

**Figure S1.** Enzymatic reductive amination of compound **3a** and methylamine catalyzed by *AspRedAm*.

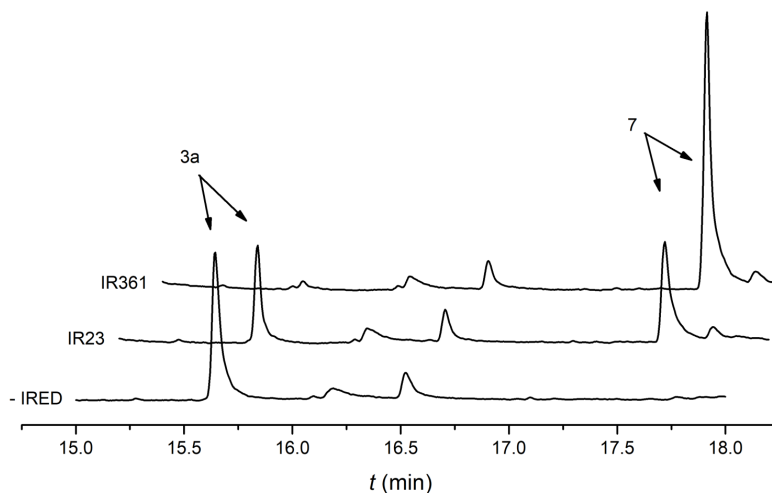

**Figure S2.** Enzymatic reductive amination of compound **3a** and methylamine catalyzed by IR-23 and IR-361.

## II. Materials and methods

### Bacterial strains, plasmids, and chemicals

*Escherichia coli* DH5 $\alpha$  (Shenzhen KT Life technology) and BL21(DE3) (Shanghai Weidi Biotechnology Co. Ltd.) strains were used for cloning and protein expression, respectively. The codon-optimized genes of 4-OT, CHMI, DDT, and MIF were synthesized and subcloned into pET-29a(+) vector (Novagen) by *Nde*I and *Bam*HI

restriction sites by Genscript (Nanjing, China). The 4-OT mutants were made from this plasmid using the QuikChange Site-Directed Mutagenesis and verified by DNA sequencing. The codon-optimized genes of *AspRedAm*, IR23, and IR361 were synthesized and subcloned into pET-28a(+) vector (Novagen) by *NdeI* and *XhoI* restriction sites by Genscript (Nanjing, China). Protein and nucleotide sequences are listed in Table S1 and Table S2, respectively. PCR primers used in this work are listed in Table S3. DNA sequencing was conducted by Sangon Biotech. Chemicals used for protein expression, purification and enzymatic assays were purchased from Sangon Biotech, Sigma-Aldrich and Solarbio. Protein concentrations were determined using BCA Protein Assay Kit (Beyotime Biotechnology) according to the manufacturer's protocol.

**Table S1.** Protein sequences

| Protein                  | Sequence                                                                                                                                                                                                                                                                                                           |
|--------------------------|--------------------------------------------------------------------------------------------------------------------------------------------------------------------------------------------------------------------------------------------------------------------------------------------------------------------|
| 4-OT (63 aa)             | MPIAQIHILEGRSDEQKETLIREVSEAISRSLDAPLTSVRVIITEMAKGHFGIGGELASKVRR*                                                                                                                                                                                                                                                   |
| CHMI (126 aa)            | MPHFIVECDNIREEADLPGLFAKVNPTLAATGIFPLAGIRSRVHWVDTWQADGQHDYAFVHMTLKIGAGR SLESRQQAGEMLFELIKTHFAALMESRLLALSFEIEELHPTLNFQNNVHALFK*                                                                                                                                                                                      |
| DDT (118 aa)             | MPFLELDTNLPANRVPAGLEKRLCAAAASILGKPADRVNVTVRPGLAMALSGSTEPCAQLS ISSIGVVGTAE DNRSHSAHF FEFLTKELALGQDRILIRFFPLESWQIGKIGTVMTFL*                                                                                                                                                                                         |
| MIF (115 aa)             | MPMFIVNTNVPRASVPEGFLSELTQQLAQATGKPAQYIAVHVVPDQLMTFSGTNDPCALCSLHSIGKIGGAQ NRYSKLLCGLLSDRLHISPDRVYINYYDMNAANVGWNGSTFA*                                                                                                                                                                                               |
| <i>AspRedAm</i> (295 aa) | MSKHIGIFGLGAMGTALAAKYLEHGYKTSVWNRTTAKAIPLVEQGAKLASTISEGVNANDLIIICLLNNQVV EDALRDALQTLPSKTI VNL TNGTPNQARKLADFV TSHGARYIHGGIMAVPTMIGSPHAVLLYSGESLELFQS IESHL SLLGMSKYLGT DAGSASLHDLALLSGMYGLFSGFLHAVALIKSGQDTSTTATGLLPLLTPWLSAMTG YLSSIAKQIDGDYATQGSNLGMQLAGVENIRIRAGEEQRVSSQMILPIKALIEQAVGEGHGGEDLSALIEYF KVGKNVD*  |
| IR-23 (291 aa)           | MKPGISVLGTGRMGSA LVGAF LKQGYNAVWNRTKSKCAPLAALGARVATTVRDAVADA E VVVVNVNDYVTS EALLRQDDVTKGLRGKLI VQLTSGSPRQAREMAAWARQHELQYLDGAIMGTPNFI GEPGGTILYSGPGALFE KYKPVLLV LGGNSLHVGS DVGHASALDSALLSFLWGS MFV LQAVSVCEAEGLPLGAYMEYVQATKPMVDGA VTD FVKRIQTGRFAGDEKTLATVEAHHGALRHLIELCEEHGIHHA VPAAFGQLFQAALQAGHAQDDFAVLNK FMK* |
| IR-361 (297 aa)          | MSDPNADRPPVTVVGLGLMGQALAAFLKGGHPTTVWNRSPEKAERLVADGAVLADTLESAVTASPLVIVCV SDYDAVHELIRPVESALAGRVLVNLT TATSQARETAEWAAQRNIPYLDGAIMAIPPVIGTDGAVLLYSGHK SAFEAHESTLKA IAPAATTYLEEDHGLSSLYDMALLGIMWGI LNFGLHGAALLGTAKVKAET FAPLANTMIS AI TEYVTAYAPQVDEGRYEATDATMTVHQAA MEHLAESEHLGIHSELPRFFKTLADRAVADGHAENSYAAM IELFRKPTA*  |

**Table S2.** Nucleotide sequences

| Protein | Sequence |
|---------|----------|
|---------|----------|

|                   |                                                                                                                                                                                                                                                                                                                                                                                                                                                                                                                                                                                                                                                                                                                                                                                                                                                                                                                                                             |
|-------------------|-------------------------------------------------------------------------------------------------------------------------------------------------------------------------------------------------------------------------------------------------------------------------------------------------------------------------------------------------------------------------------------------------------------------------------------------------------------------------------------------------------------------------------------------------------------------------------------------------------------------------------------------------------------------------------------------------------------------------------------------------------------------------------------------------------------------------------------------------------------------------------------------------------------------------------------------------------------|
| 4-OT (192 bp)     | ATGCCGATCGCGCAGATCCACATTTCTGGAGGGTCTAGCGACGAGCAAAAGGAAACCCTGATCCGTGAGGTG<br>TCTGAAGCGATTAGCCGTAGCCTGGATGCGCCGCTGACCAGCGTGGCTTTATCATTACCGAGATGGCGAAG<br>GGTCACTTCGGCATTGGTGGCGAACTGGCGAGCAAAGTTCGTCTGTTAA                                                                                                                                                                                                                                                                                                                                                                                                                                                                                                                                                                                                                                                                                                                                                    |
| CHMI (381 bp)     | ATGCCCCACTTTATAGTAGAATGTTTCAGATAACATTCGCGAAGAGGCAGACCTGCCGGGTCTGTTCCGCAAA<br>GTGAATCCGACTTTGGCGGCTACCGGTATTTTTCCGCTGGCGGTATTCGTTCTCGTGTTCATTGGGTTGAT<br>ACCTGGCAGATGGCTGACGGCAACACGATACGCCCTTCGTGCACATGACCCTGAAAATCGGGCGCTGGCCGT<br>AGCCTGGAATCCCGTCAGCAGGCAGGTGAAATGTTGTTTCGAGCTTATCAAGACCCATTTTGGCGGCTGATG<br>GAATCGCGCTTGCTGGCGCTGAGCTTTGAGATCGAGGAGCTGCATCCAACGTTGAATTTAAGCAAAACAAC<br>GTCCACGGCTCTTCAAGTAA                                                                                                                                                                                                                                                                                                                                                                                                                                                                                                                                             |
| DDT (357 bp)      | ATGCCCTTTTTGGAATTAGATACAAATCTACCGGCTAATCGTGTTCGGCGGGTTTGGAGAAACGTCTGTGC<br>GCTGCCGCGCGAGCATCTTAGGTAAGCCGGCGGACCGCTGAACGTGACCGTTCCGCCAGGTCTGGCTATG<br>GCACTCTCCGTTCCACCGAACCGTGTGCCAACTGTCGATCAGCTCTATCGGTGTTTGGGACCCGCGGAA<br>GACAACAGAAGCCATAGCGCACACTTTTTTCGAGTTCCTTGACCAAAGAACTGGCGCTGGCCAGGATCGTATT<br>CTGATTCGTTTTTCCCGCTGGAGAGCTGGCAGATTGGCAAGATCGGCACTGTCTATGACGTTTTTGTAA                                                                                                                                                                                                                                                                                                                                                                                                                                                                                                                                                                            |
| MIF (348 bp)      | ATGCCCATGTTTATAGTAAACACAAATGTTCCACGTGCAGCGTCCCGGAAGGTTTCTTGTCCGAGCTGACC<br>CAACAGCTGGCACAGGCTACCGGTAAGCCGGCGCAATATATCGCTGTGCATGTTGTTCCGGACCAGCTGATG<br>ACCTTCAGCGGCACTAATGATCCGTGTGACTGTGCTCGCTGCACAGCATTTGGCAAAATCGGGCGTGGC<br>AACCGTAATTACAGCAAACTGTTATGCGTCTGCTCTCTGATCGTTGCACATCTCCCGGACCGTGTATTAT<br>ATTAACTACTACGACATGAACGCCGGAACGTGGGTGGAATGGCAGCACGTTTGGCGTAA                                                                                                                                                                                                                                                                                                                                                                                                                                                                                                                                                                                       |
| AspRedAm (888 bp) | ATGTCCAAGCACATCGGTATCTTCGGTCTGGGTGCAATGGGTACCGCACTGGCTGCGAAATACCTGGAGCAT<br>GGTTACAAAACCTCTGTTTGGAAACCGTACTACCGCGAAAGCGATCCCGTGGTTGAGCAGGGTGCTAAGCTG<br>GCGTCTACCATCAGCGAAGGTGTTAACCGCAACGACCTGATCATTATCTGCCTGCTGAACAACAGGTTGTT<br>GAAGATGCGCTGCGTGACGCGCTGCAAACCTGCCGTCTAAAACCATCGTTAACCTGACTAACGGTACTCCG<br>AACCAGGCGCTAAACTGCGCAGACTTCGTTACCTCTCACGGTGCACGTTACATCCACGGTGGTATCATGGCG<br>GTGCCGACCATGATTGGCTCTCCGACCGCAGTGTCTGTACTCTGGTGAATCCCTGGAACTGTTTCAGTCT<br>ATTGAATCTCACCTGTCTCTGCTGGGTATGAGCAAGTATCTGGGCACGACGCGGCTCTGCGAGCTGCAT<br>GATCTGGCACTGCTGTCTGGCATGTACGGTCTGTTCTCTGGTTTCCCTGCACGCGGTGGCTCTGATTAATCT<br>GGTCAGGACACCTCCACCCTGCAACTGGTCTGCTGCCGCTGCTGACTCCGTGGCTGAGCGCAATGACCGGT<br>TACCTGAGTCTATCGCGAAACAGATCGACGACGGTGAATTACGCGACCCAGGGTCTAACCTGGGCATGCAG<br>CTGGCTGGTGTGAAACATCATCCGTGCGGGTGAAGAACAGCGTGTTCCTTCTCAGATGATCCTGCCGATC<br>AAAGCACTGATTGAACAGCGGTTGGTGAAGGTATGGTGGCGAAGACCTGTCCGCGCTGATCGAATACTTC<br>AAGGTGGGTAAAAACGTTGACTAA |
| IR-23 (876 bp)    | ATGAAACCCGGGATATCAGTACTAGGTACAGGACGCATGGGCTCTGCGTTGGTTCGGTGCCTTTCTGAAACAG<br>GGTTATAACGTCGCAGTTTGGAAATCGTACCAAGTCCAAGTGCCTCCGCTGGCAGCGCTGGGCGCGCTGTT<br>GCGACCACCGTGCCTGATGCAGTAGCGGACGCAGAGGTGGTTGTTGTGAACGTGAACGATTACGTGACGAGC<br>GAGGCTTTGTTGCGCAAAGATGACGTGACGAAGGGTCTGAGAGGCAAACGATCGTGCAGCTGACCAGCGGC<br>TCCCGCGTCAAGCTCGTGAATGGCAGCCTGGGCACGCCAGCATGAACTGCAATACCTGGACGGCGCAATT<br>ATGGGTACACCGAATTTTATTTGGTGGTGGTGGTACGATCCTGTACAGCGGTCCGGTCCCTCTTCGAG<br>AAGTATAAACCAAGTGTATTGTTGTTCTTGGCGGAAACAGCCTGCACGTTGGTTCCGATGTGGGCCACGCGTCC<br>GCTCTTGACAGCGCTTTGCTGAGCTTCCGTGGGGTCTATGTTCCGGCTTCTGCAGGCGGTAAGCGTTTGT<br>GAAGCGGAGGCGCTGCCGTTGGGCGCTATATGGAATACGTTCAAGCGACTAAGCCGATGGTTGACGGCGCT<br>GTCACCGATTTTCGTGAAACGTATTACAGCCGGTCTGTTTTGCGGGTATGAAAAGACCCCTGGCGACCGTTGAG<br>GCGCATCACGGCGCCCTGCGCCATCTGATCGAACTTTCGAGGAACATGGCATCCACCACGCGCTTCCGGCG<br>GCATTCGGTCACTGTTTCAGGCTGCCCTGCAAGCCGGTACGCGCAAGACGACTTCGCGGTCTTGAATAAA<br>TTCATGAAATAA         |
| IR-361 (894 bp)   | ATGTCAGACCCTAATGCTGATAGGCCCCAGTAACTGTCGTGGGTCTGGGCCTGATGGGCCAGGCACCTCGCC<br>CGGGCGTTCTGAAGGGTGGTCACTCCGACGACCGTTTTGGAATCGTAGCCCGGAAAAAGCCGAACGTTTTGGTG<br>GCGGACGGTGGCGTGTGGCGGACACCTTGGAGAGTGTGTGACCGCATCCCCGCTAGTTATTGTTTGGCTT<br>AGCGATTACGACGCTGTACAGAGCTGATTCGTCCGGTTGAATCCGCCCTTGGCGGGTCCGCTTCTGGTTAAT<br>CTGACCACCGGACAGCACCAAGCTCGTGAACCGCGGAGTGGGCGGCGCAGCGTAACATTCCGTATCTG<br>GATGGCGCAATCATGGCCATCCACCAGGTGATCGGCACGACGGCGCGGTGCTGCTGTACAGCGGTACAAA<br>AGCGCGTTCGAGGCACATGAGTCGACCTGAAGGCCATCGCACGGCAGCGACCCACCTACCTGGAAGAGGAT<br>CATGGCCTGTCTCGCTGATGATATGGCTCTTCTGGGATCATGTGGGTATTCTGAACGGTTTTCTGCAT<br>GGCGCGCCCTGTTGGGGACGGCTAAAGTCAAAGCGGAGACGTTTTGCTCCGCTCGCGAACACCATGATCAGC<br>CGGATTACCGAATACGTGACCGGTATGCGCCTCAGTTGATGAAGGTGCTATGAAGCGACCGATGCCACC<br>ATGACCGTGCACCAAGCTGCTATGGAACATCTGGCTGAGGAATCTGAGCACCTGGGCATCCACAGCGAATTA                                                                                                          |

|  |                                                                                                             |
|--|-------------------------------------------------------------------------------------------------------------|
|  | CCGCGTTTTTTCAAGACGTTGGCGGACAGAGCAGTTCGCAGACGGTCACGCAGAGAACTCTTACGCAGCTATG<br>ATTGAGCTGTTCCGCAAGCCGACTGCGTAA |
|--|-------------------------------------------------------------------------------------------------------------|

**Table S3.** Primers used for site-directed mutagenesis.

| Primer | Nucleotide sequence (5'-3')       |
|--------|-----------------------------------|
| F50A-F | ATGGCGAAGGGTCACGYGGGCATTGGTGG     |
| F50A-R | CRCGTGACCCTTCGCCATCTCGGTAATG      |
| F50V-F | ATGGCGAAGGGTCACGYGGGCATTGGTGG     |
| F50V-R | CRCGTGACCCTTCGCCATCTCGGTAATG      |
| F50I-F | ATGGCGAAGGGTCACATTGGCATTGGTGG     |
| F50I-R | AATGTGACCCTTCGCCATCTCGGTAATG      |
| F50L-F | ATGGCGAAGGGTCACCTGGGCATTGGTGG     |
| F50L-R | CAGGTGACCCTTCGCCATCTCGGTAATG      |
| P1A-F  | GGAGATATACATATGGCGATCGCGCAGATC    |
| P1A-R  | CGCCATATGTATATCTCCTTCTTAAAGTTAAAC |

### Protein expression and purification

#### Expression and purification of the wild-type 4-OT and its mutants

The wild-type 4-OT and its mutants were expressed and purified according to a literature method.<sup>[1]</sup>

#### Expression and purification of MIF

MIF was expressed and purified according to modified literature protocols.<sup>[2]</sup> pET29a-MIF was freshly transformed into chemically competent *E.coli* BL21(DE3) cells for protein expression. An individual colony was used directly to prepare a 10 mL starter culture in LB medium supplemented with 50 µg/mL kanamycin. The starter culture was incubated overnight at 37 °C with 220 r.p.m. shaking. The overnight culture was diluted 1:100 into 1 L of LB medium containing kanamycin (50 mg/L). The culture was incubated at 37 °C with 220 r.p.m. shaking. When OD<sub>600</sub> reached 0.6–0.8, protein expression was induced by adding isopropyl β-D-1-thiogalactopyranoside (IPTG) to a final concentration of 1 mM. The culture was incubated at 37 °C for 12–15 hours with 230 r.p.m. shaking.

Cells from 1 L culture were harvested by centrifugation (6,000 × g, 20 min, 4 °C) and resuspended in 40 mL lysis buffer (20 mM Tris-HCl, pH 8.0, buffer A). Cells were lysed using a continuous-flow homogenizer (ATS Engineering Inc.) and the lysate was clarified by centrifugation (40,000 × g, 40 min, 4 °C). The supernatant was

applied to 8 mL of Q Beads 6 FF (Smart-Lifesciences) preequilibrated with lysis buffer. The column was then washed with lysis buffer ( $3 \times 8$  mL). Protein was eluted from column in elution buffer (lysis buffer containing 0.1 M–0.5 M NaCl) in multiple 2 mL fractions. Fractions containing the desired protein, as determined by Tricine-SDS-PAGE (18% resolving gel and 5% stacking gel), were combined and concentrated using an Amicon Ultra-15 Centrifugal Filter (Merck Millipore) with a 3 kDa molecular weight cut-off membrane. The buffer was exchanged against buffer B (20 mM Tris-HCl, pH 6.5) using a pre-packed PD-10 Sephadex G-25 gel filtration column (GE Healthcare). The protein was further purified using SP Beads 6 FF (Smart-Lifesciences) by gradient elution with buffer B containing 0.1 M–0.5 M NaCl. The fractions containing MIF, as determined by Tricine-SDS-PAGE (18% resolving gel and 5% stacking gel) were pooled and concentrated. The concentrated protein was further purified by size-exclusion chromatography on a Superdex 75 HR 10/300 gel filtration column (GE Healthcare) equilibrated in protein storage buffer (20 mM Tris-HCl, pH 7.4, 20 mM NaCl). The fractions containing pure MIF were pooled and concentrated to 3.7 mg/mL (1 mL). The protein was flash frozen with liquid nitrogen and stored at  $-80$  °C.

#### **Expression and purification of DDT**

DDT was expressed and purified according to a modified literature protocol.<sup>[3]</sup> pET29a-DDT was freshly transformed into chemically competent *E.coli* BL21(DE3) cells for protein expression. An individual colony was used directly to prepare a 10 mL starter culture in LB medium supplemented with 50  $\mu$ g/mL kanamycin. The starter culture was incubated overnight at 37 °C with 220 r.p.m. shaking. The overnight culture was diluted 1:100 into 1 L of LB medium containing kanamycin (50 mg/L). The culture was incubated at 37 °C with 220 r.p.m. shaking. When  $OD_{600}$  reached 0.6–0.8, protein expression was induced by adding IPTG to a final concentration of 0.5 mM. The culture was incubated at 37 °C for 12–15 hours with 230 r.p.m. shaking.

Cells from 1 L culture were harvested by centrifugation ( $6,000 \times g$ , 20 min, 4 °C) and resuspended in 40 mL lysis buffer (20 mM Tris-HCl, pH 7.0, buffer A). Cells were lysed using the continuous-flow homogenizer and the lysate was clarified by centrifugation ( $40,000 \times g$ , 40 min, 4 °C). The supernatant was applied to 8 mL of SP Beads 6FF (Smart-Lifesciences) preequilibrated with buffer A. The column was then washed with buffer A ( $3 \times 8$  mL). Protein was eluted from column in elution buffer (buffer A containing 0.1 M–0.5 M NaCl) in multiple 2 mL fractions. Fractions containing the desired protein, as determined by Tricine-SDS-PAGE (18% resolving gel and 5% stacking gel), were pooled and made 1.5 M in  $(NH_4)_2SO_4$ . After stirring for 2 hours at 4 °C, the precipitate was removed by centrifugation ( $20,000 \times g$ , 20 min, 4 °C), and the supernatant was loaded onto 8 mL of phenyl Beads 6FF (High Sub) (Smart-Lifesciences) preequilibrated with buffer B (20 mM potassium phosphate, pH 7.0) containing 1.5 M  $(NH_4)_2SO_4$ . The column was first washed with buffer B containing 1.5 M  $(NH_4)_2SO_4$  ( $3 \times 8$  mL) and then the protein was eluted by gravity flow by using buffer B containing 1.5 M–0.4 M  $(NH_4)_2SO_4$  in multiple 2 mL fractions. Fractions containing the desired protein, as determined by Tricine-

SDS-PAGE were combined and concentrated using an Amicon Ultra-15 Centrifugal Filter (Merck Millipore) with a 3 kDa molecular weight cut-off membrane. The concentrated protein was further purified by size-exclusion chromatography on a Superdex 75 HR 10/300 gel filtration column (GE Healthcare) equilibrated in buffer A containing 50 mM NaCl. The fractions containing pure DDT were pooled and concentrated to 8.3 mg/mL (0.5 mL). The protein was flash frozen with liquid nitrogen and stored at  $-80^{\circ}\text{C}$ .

#### **Expression and purification of CHMI**

CHMI was expressed and purified according to modified literature protocols<sup>[4]</sup>. pET29a-CHMI was freshly transformed into chemically competent *E.coli* BL21(DE3) cells for protein expression. An individual colony was used directly to prepare a 10 mL starter culture in LB medium supplemented with 50  $\mu\text{g/mL}$  kanamycin. The starter culture was incubated overnight at  $37^{\circ}\text{C}$  with 220 r.p.m. shaking. The overnight culture was diluted 1:100 into 1 L of LB medium containing kanamycin (50 mg/L). The culture was incubated at  $37^{\circ}\text{C}$  with 220 r.p.m. shaking. When  $\text{OD}_{600}$  reached 0.6–0.8, protein expression was induced by adding IPTG to a final concentration of 1 mM. The culture was incubated at  $37^{\circ}\text{C}$  for 12–15 hours with 230 r.p.m. shaking.

Cells from 1 L culture were harvested by centrifugation ( $6,000 \times g$ , 20 min,  $4^{\circ}\text{C}$ ) and resuspended in 40 mL lysis buffer (20 mM Tris-HCl, pH 7.5, buffer A). Cells were lysed using the continuous-flow homogenizer and the lysate was clarified by centrifugation ( $40,000 \times g$ , 40 min,  $4^{\circ}\text{C}$ ). The supernatant was applied to 8 mL of Q Beads 6 FF (Smart-Lifesciences) preequilibrated with lysis buffer. The column was then washed with buffer A ( $3 \times 8$  mL). Protein was eluted from column in elution buffer (lysis buffer containing 0.1 M–0.5 M NaCl) in multiple 2 mL fractions. Fractions containing the desired protein, as determined by Tricine-SDS-PAGE (18% resolving gel and 5% stacking gel), were pooled and made 1.7 M in  $(\text{NH}_4)_2\text{SO}_4$ . After stirring for 2 hours at  $4^{\circ}\text{C}$ , the precipitate was removed by centrifugation ( $20,000 \times g$ , 20 min,  $4^{\circ}\text{C}$ ) and the supernatant was loaded onto 8 mL of phenyl Beads 6FF (High Sub) (Smart-Lifesciences) that had been previously equilibrated with buffer B (100 mM sodium phosphate, pH 7.5) containing 1.7 M  $(\text{NH}_4)_2\text{SO}_4$ . The column was first washed with buffer B containing 1.7 M  $(\text{NH}_4)_2\text{SO}_4$  ( $3 \times 8$  mL) and then the protein was eluted by gravity flow by using buffer B containing 1.7 M–0.1 M  $(\text{NH}_4)_2\text{SO}_4$  in multiple 2 mL fractions. Fractions containing the desired protein, as determined by Tricine-SDS-PAGE, were combined and concentrated using an Amicon Ultra-15 Centrifugal Filter (Merck Millipore) with a 3 kDa molecular weight cut-off membrane. The concentrated protein was further purified by size-exclusion chromatography on a Superdex 75 HR 10/300 gel filtration column (GE Healthcare) equilibrated in protein storage buffer (50 mM sodium phosphate, pH 7.5, 150 mM NaCl). The fractions containing pure CHMI were pooled and concentrated to 16.4 mg/mL (0.5 mL). The protein was flash frozen with liquid nitrogen and stored at  $-80^{\circ}\text{C}$ .

#### **Expression and purification of AspRedAm**

*AspRedAm* was expressed and purified based on a literature protocol.<sup>[5]</sup> pET28a-*AspRedAm* plasmid was transformed into chemically competent *E.coli* BL21(DE3) cells for protein expression. An individual colony was used directly to prepare a 5 mL starter culture in LB medium supplemented with 50 µg/mL kanamycin. The starter culture was incubated overnight at 37 °C with 220 r.p.m. shaking. The overnight culture was diluted 1:100 into 500 mL 2× YT broth medium with kanamycin (50 mg/L). The culture was incubated at 37 °C with 220 r.p.m. shaking. When OD<sub>600</sub> reached 0.6–0.8, protein expression was induced by adding IPTG to a final concentration of 0.5 mM. The culture was incubated at 20 °C for 15 hours with 230 r.p.m. shaking.

Cells from 0.5 L culture were harvested by centrifugation (6,000 × g, 20 min, 4 °C) and resuspended in lysis buffer (100 mM Tris-HCl, pH 8.0, 300 mM NaCl, buffer A). Cells were lysed using the continuous-flow homogenizer and the lysate was clarified by centrifugation (40,000 × g, 40 min, 4 °C). The supernatant was applied to 4 mL of Ni-NTA beads (Smart-Lifesciences) preequilibrated with lysis buffer. The column was washed with lysis buffer (3 × 4 mL). The samples were gradient washed with elution buffer (buffer A containing 30 mM–300 mM imidazole). Fractions were collected and analyzed by SDS-PAGE (10 % polyacrylamide gel). Those containing purified *AspRedAm* were combined and concentrated using an Amicon Ultra-15 Centrifugal Filter with a 10 kDa molecular weight cut-off membrane. The proteins were further purified by size-exclusion chromatography on Superdex 75 HR 10/300 gel filtration column with protein storage buffer (100 mM sodium phosphate, pH 7.5, 500 mM NaCl) as the eluent. The fractions containing pure *AspRedAm* were pooled and concentrated to 32.4 mg/mL (2 mL). Then the proteins were flash frozen in liquid nitrogen and stored at –80 °C.

#### **Expression and purification of IREDs (IR23, IR361)**

IREDs were expressed and purified according to a literature protocol.<sup>[6]</sup> The IRED-containing pET-28a(+) plasmid was freshly transformed into chemically competent *E.coli* BL21(DE3) cells for protein expression. An individual colony was used directly to prepare a 10 mL starter culture in LB medium supplemented with 50 µg/mL kanamycin. The starter culture was incubated overnight at 37 °C with 220 r.p.m. shaking. The overnight culture was diluted 1:100 into 1 L of terrific broth medium containing kanamycin (50 mg/L). The culture was incubated at 37 °C with 220 r.p.m. shaking. When OD<sub>600</sub> reached 0.6, protein expression was induced by adding IPTG to a final concentration of 0.5 mM. The culture was incubated at 23 °C for 15 hours with 230 r.p.m. shaking.

Cells from 1 L culture were harvested by centrifugation (6,000 × g, 20 min, 4 °C) and resuspended in lysis buffer (100 mM sodium phosphate, pH 7.0, 300 mM NaCl) containing 30 mM imidazole. Cells were lysed using the continuous-flow homogenizer and the lysate was clarified by centrifugation (40,000 × g, 40 min, 4 °C). The supernatant was applied to 10 mL of Ni NTA Beads (Smart-Lifesciences) preequilibrated with lysis buffer. The column was then washed with lysis buffer (3 × 10 mL). Protein was eluted from column in elution buffer (lysis buffer containing 30 mM–300 mM imidazole) in multiple 2 mL fractions. Fractions were analyzed by SDS-PAGE (10 % polyacrylamide gel). Those containing purified IRED proteins were combined and dialyzed at 4 °C



against 2 L of dialysis buffer (100 mM sodium phosphate, pH 7.0). Following dialysis purified proteins were concentrated to 75 mg/mL (5 mL) using an Amicon Ultra-15 Centrifugal Filter with a 10 kDa molecular weight cut-off membrane. The protein was flash frozen in liquid nitrogen and stored at  $-80\text{ }^{\circ}\text{C}$ .

### Reaction condition optimization of 4-OT mutants

Chemically competent *E. coli* BL21 (DE3) with 4-OT mutants-containing plasmids were grown in 1 L of terrific broth medium at  $37\text{ }^{\circ}\text{C}$ . The pelleted wet cells were weighed and suspended in 3 mL of lysis buffer (20 mM sodium phosphate, pH 7.3) per 1 g of wet cell mass. Cells were lysed using the continuous-flow homogenizer and the lysate was clarified by centrifugation ( $40,000 \times g$ , 40 min,  $4\text{ }^{\circ}\text{C}$ ). All extracts contained about 11.5 mg/mL of total *E. coli* proteins. All of prepared cell extract was flash frozen in liquid nitrogen and stored at  $-80\text{ }^{\circ}\text{C}$  until use.

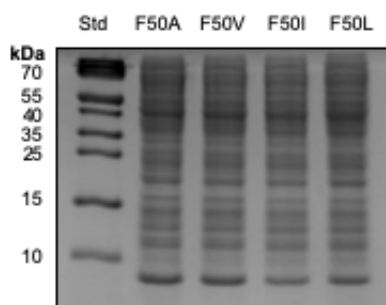

**Figure S3.** SDS-PAGE of 4-OT mutants

The single incubation mixtures consisting of a total volume of 50 mL contained CFE, 4 mM cinnamaldehyde (**1a**), 50 mM nucleophile, and 5% (v/v) co-solvent. The reaction volume was made up to 50 mL with buffer (20 mM sodium phosphate, pH 7.3). The mixture was incubated at  $25\text{ }^{\circ}\text{C}$  and 150 r.p.m for 12 hours, after which the reaction mixture was extracted with ethyl acetate ( $3 \times 50\text{ mL}$ ). The combined organic layers were washed with brine, dried over anhydrous sodium sulfate, and concentrated under *vacuo*. The residue was purified by column chromatography (*n*-pentane/ethyl acetate = 15:1, silica gel) to afford the product.

### Analytical scale reactions

Activity comparison of wild-type 4-OT and variants 4-OT F50A, 4-OT F50V, 4-OT F50I, 4-OT F50L, and 4-OT P1A with other tautomerases (CHMI, DDT, MIF) for addition of **2a** to **1a** was carried out on analytical scale reactions (0.2 mL reaction volume). Reaction mixtures consisted of 2 mM **1a**, 40 mM **2a**, 14.25% mM purified enzyme in 20 mM sodium phosphate buffer at pH 7.3 (except that 50 mM sodium phosphate buffer containing 150 mM NaCl, pH 7.5 for CHMI; 20 mM Tris-HCl buffer containing 50 mM NaCl, pH 7.0 for DDT; 20 mM Tris-HCl buffer containing 20 mM NaCl, pH 7.4 for MIF), and 5% DMSO (v/v). The mixtures were incubated at room temperature with 500 r.p.m. for 6 hours. The reaction was terminated by extraction with ethyl acetate (3

× 0.2 mL). The combined organic layers were concentrated by nitrogen Termovap Sample Concentrator and the samples were resolved in ethyl acetate (0.4 mL). Then the samples were centrifuged (17,000 × g, 10 min, 25 °C) and subjected to GC–MS analysis. The conversion was determined by GC–MS analysis based on consumption of **1a**. Measurements were performed in triplicates from the same protein batch.

For the reductive amination reaction catalyzed by *AspRedAm*, a typical 200 µL reaction mixture contained 25 mM D-glucose, 3.5 U GDH (Beijing Aibixin Biotechnology Co., Ltd.), 1 mM NADP<sup>+</sup>, 0.8 mg/mL *AspRedAm*, 4 mM **3a**, 40 mM methylamine (in buffer adjusted to pH 9.0) and 5% (v/v) dimethyl sulfoxide. The reaction volume was made up to 200 µL with Tris-HCl buffer (100 mM, pH 9.0). Reactions were incubated at 29 °C with shaking at 450 r.p.m. for 18 hours, after which they were extracted three times with 200 µL ethyl acetate. The organic fractions were combined, centrifuged (17,000 × g, 10 min, 25 °C), and analyzed by GC–MS.

For the reductive amination reaction catalyzed by IRED, a typical 500 µL reaction mixture contained 50 mM D-glucose, 2.5 U GDH (Beijing aibixin Biotechnology Co., Ltd.), 0.5 mM NADP<sup>+</sup>, 0.8 mg/mL IRED, 10 mM **3a**, 100 mM methylamine (in buffer adjusted to pH 8.0) and 5% (v/v) dimethyl sulfoxide. The reaction volume was made up to 500 µL with buffer (100 mM sodium phosphate, pH 8.0). Reactions were incubated at 30 °C with shaking at 120 r.p.m. for 18 hours, after which they were extracted three times with 500 µL ethyl acetate. The organic fractions were combined, centrifuged (17,000 × g, 10 min, 25 °C), and analyzed by GC–MS.

### **Biocatalytic synthesis of compounds 3a-p (preparative scale)**

To test the synthetic applicability of 4-OT F50V, a series of preparative-scale reactions were performed. Preparative-scale reactions (50 mL) were run using **2a** (42 mM, except for **1d** and **1i** for which 28 mM **2a** was used), **1a-p** (6 mM, except for **1d** and **1i** which was used at 4 mM) and 4-OT F50V enzyme (57 mg, except for **1o**, **1d** and **1i** for which 89 mg enzyme was used and **1c** for which 64 mg enzyme was used) in buffer (20 mM sodium phosphate, pH 6.6) containing 5% (v/v) DMSO (except for **1d** and **1i** for which 10% (v/v) ethanol was used). Reactions were incubated at 25 °C with 150 r.p.m. shaking and monitored by GC–MS. The reaction mixture was extracted with ethyl acetate (3 × 50 mL). The combined organic layers were washed with brine, dried over anhydrous sodium sulfate, and concentrated under *vacuo*. The residue was purified by column chromatography (hexane/ethyl acetate from 20:1 to 5:1, silica gel) to afford **3a-p**.

### **GC–MS analysis**

GC–MS was performed on a Shimadzu Nexis GC-2030 series GC system equipped with an SH-Rxi-5Sil column (30 m × 0.25 mm × 0.25 mm; Shimadzu) and coupled with a QP2020 NX mass spectrometer. The carrier gas

was helium at a constant linear velocity of 44.5 cm/sec. Injection was in split-less mode with the injector temperature set at 250 °C and the oven temperature was programmed from 80 °C to 300 °C at 10 °C/min and keep 2 min at 80 °C and 5 min at 300 °C. The identity of the product was confirmed based on the concordance of mass spectrum with standard samples from chemical synthesis. The quantification of products was confirmed by the external standard method.

**(S)-Diethyl 2-(2-formyl-1-phenylethyl)malonate (3a)** Yellow oil (87% isolated yield).  $[\alpha]_D^{25.0} = +22.10$  (*c* 1.0, CH<sub>2</sub>Cl<sub>2</sub>). <sup>1</sup>H NMR (400 MHz, CDCl<sub>3</sub>): δ 9.55 (d, *J* = 0.7 Hz, 1H), 7.28–7.12 (m, 5H), 4.16 (q, *J* = 7.1 Hz, 2H), 4.02–3.84 (m, 3H), 3.67 (d, *J* = 10.0 Hz, 1H), 2.95–2.76 (m, 2H), 1.22 (t, *J* = 7.1 Hz, 3H), 0.95 (t, *J* = 7.1 Hz, 3H). <sup>13</sup>C NMR (101 MHz, CDCl<sub>3</sub>): δ 200.2, 168.1, 167.5, 139.9, 128.8, 128.2, 127.6, 61.9, 61.5, 57.6, 47.5, 39.6, 14.1, 13.8. HRMS (ESI): *m/z* calcd for C<sub>16</sub>H<sub>20</sub>O<sub>5</sub>+Na<sup>+</sup>: 315.1208 [*M*+Na]<sup>+</sup>; found: 315.1201.

**(S)-Diethyl 2-(1-(4-fluorophenyl)-2-formylethyl)malonate (3b)** Colorless oil (69% isolated yield).  $[\alpha]_D^{21.7} = +16.60$  (*c* 1.0, EtOAc). <sup>1</sup>H NMR (400 MHz, CDCl<sub>3</sub>): δ 9.59 (dd, *J* = 2.1, 1.2 Hz, 1H), 7.22 (dd, *J* = 8.6, 5.4 Hz, 2H), 6.97 (t, *J* = 8.7 Hz, 2H), 4.23–4.15 (m, 2H), 4.05–3.91 (m, 3H), 3.66 (d, *J* = 10.0 Hz, 1H), 2.98–2.79 (m, 2H), 1.25 (t, *J* = 7.1 Hz, 3H), 1.02 (t, *J* = 7.1 Hz, 3H). <sup>13</sup>C NMR (101 MHz, CDCl<sub>3</sub>): δ 199.8, 168.0, 167.5, 163.3, 160.8, 135.8, 135.7, 130.0, 129.9, 115.8, 115.6, 62.0, 61.6, 57.6, 47.7, 38.8, 14.1, 13.9. HRMS (ESI): *m/z* calcd for C<sub>16</sub>H<sub>19</sub>FO<sub>5</sub>+Na<sup>+</sup>: 333.1114 [*M*+Na]<sup>+</sup>; found: 333.1109.

**(S)-Diethyl 2-(1-(4-chlorophenyl)-2-formylethyl)malonate (3c)** Colorless oil (84% isolated yield).  $[\alpha]_D^{25.2} = +16.90$  (*c* 1.0, EtOAc). <sup>1</sup>H NMR (400 MHz, CDCl<sub>3</sub>): δ 9.59 (t, *J* = 1.5 Hz, 1H), 7.31–7.08 (m, 4H), 4.28–4.11 (m, 2H), 4.07–3.87 (m, 3H), 3.66 (d, *J* = 9.9 Hz, 1H), 3.04–2.73 (m, 2H), 1.25 (t, *J* = 7.1 Hz, 3H), 1.04 (t, *J* = 7.1 Hz, 3H). <sup>13</sup>C NMR (101 MHz, CDCl<sub>3</sub>): δ 199.6, 167.9, 167.4, 138.6, 133.4, 129.7, 128.9, 62.0, 61.7, 57.3, 47.5, 38.8, 14.1, 13.9. HRMS (ESI): *m/z* calcd for C<sub>16</sub>H<sub>19</sub>ClO<sub>5</sub>+Na<sup>+</sup>: 349.0819 [*M*+Na]<sup>+</sup>; found: 349.0814.

**(S)-Diethyl 2-(1-(4-bromophenyl)-2-formylethyl)malonate (3d)** Colorless oil (34% isolated yield).  $[\alpha]_D^{23.0} = +11.50$  (*c* 0.2, EtOAc). <sup>1</sup>H NMR (400 MHz, CDCl<sub>3</sub>): δ 9.60 (dd, *J* = 1.9, 1.2 Hz, 1H), 7.49–7.34 (m, 2H), 7.19–7.05 (m, 2H), 4.20 (qd, *J* = 7.1, 1.2 Hz, 2H), 3.98 (q, *J* = 7.1 Hz, 3H), 3.67 (d, *J* = 9.8 Hz, 1H), 3.05–2.77 (m, 2H), 1.26 (t, *J* = 7.1 Hz, 3H), 1.05 (t, *J* = 7.1 Hz, 3H). <sup>13</sup>C NMR (101 MHz, CDCl<sub>3</sub>): δ 199.6, 167.9, 167.4, 139.2, 131.9, 130.1, 121.5, 62.0, 61.8, 57.3, 47.5, 38.9, 14.2, 13.9. HRMS (ESI): *m/z* calcd for C<sub>16</sub>H<sub>19</sub>BrO<sub>5</sub>+Na<sup>+</sup>: 393.0314 [*M*+Na]<sup>+</sup>; found: 393.0307.

**(S)-Diethyl 2-(1-(4-methylphenyl)-2-formylethyl)malonate (3e)** Colorless oil (47% isolated yield).  $[\alpha]_D^{21.4} = +14.90$  (*c* 1.0, EtOAc). <sup>1</sup>H NMR (400 MHz, CDCl<sub>3</sub>): δ 9.58 (t, *J* = 1.8 Hz, 1H), 7.10 (q, *J* = 8.2 Hz, 4H), 4.20 (q, *J* = 7.1 Hz, 2H), 3.96 (q, *J* = 7.0 Hz, 3H), 3.68 (d, *J* = 10.0 Hz, 1H), 2.99–2.79 (m, 2H), 2.28 (s, 3H), 1.26 (t, *J* = 7.1 Hz, 3H), 1.02 (t, *J* = 7.1 Hz, 3H). <sup>13</sup>C NMR (101 MHz, CDCl<sub>3</sub>): δ 200.4, 168.2, 167.6, 137.2, 136.8, 129.5, 128.1, 61.9, 61.6, 57.8, 47.6, 39.3, 21.2, 14.2, 13.9. HRMS (ESI): *m/z* calcd for C<sub>17</sub>H<sub>22</sub>O<sub>5</sub>+Na<sup>+</sup>: 329.1365 [*M*+Na]<sup>+</sup>; found: 329.1360.

**(S)-Diethyl 2-(1-(4-methoxyphenyl)-2-formylethyl)malonate (3f)** Yellow oil (75% isolated yield).  $[\alpha]_D^{21.9} = +15.90$  (*c* 1.0, EtOAc).  $^1\text{H NMR}$  (400 MHz,  $\text{CDCl}_3$ ):  $\delta$  9.58 (dd,  $J = 2.3, 1.4$  Hz, 1H), 7.16 (d,  $J = 8.7$  Hz, 2H), 6.81 (d,  $J = 8.7$  Hz, 2H), 4.25–4.13 (m, 2H), 3.96 (q,  $J = 7.0$  Hz, 3H), 3.76 (s, 3H), 3.66 (d,  $J = 10.0$  Hz, 1H), 2.98–2.75 (m, 2H), 1.26 (t,  $J = 7.1$  Hz, 3H), 1.03 (t,  $J = 7.1$  Hz, 3H).  $^{13}\text{C NMR}$  (101 MHz,  $\text{CDCl}_3$ ):  $\delta$  200.4, 168.2, 167.6, 158.9, 131.8, 129.3, 114.2, 61.9, 61.6, 57.9, 55.3, 47.7, 39.0, 14.2, 13.9. **HRMS** (ESI):  $m/z$  calcd for  $\text{C}_{17}\text{H}_{22}\text{O}_6 + \text{Na}^+$ : 345.1314  $[\text{M} + \text{Na}]^+$ ; found: 345.1309.

**(S)-Diethyl 2-(1-(4-hydroxyphenyl)-2-formylethyl)malonate (3g)** Yellow oil (65% isolated yield).  $[\alpha]_D^{22.2} = +9.00$  (*c* 1.0, EtOAc).  $^1\text{H NMR}$  (400 MHz,  $\text{CDCl}_3$ ):  $\delta$  9.57 (dd,  $J = 2.5, 1.3$  Hz, 1H), 7.07 (d,  $J = 8.6$  Hz, 2H), 6.66 (d,  $J = 8.6$  Hz, 2H), 5.87 (s, 1H), 4.20 (q,  $J = 7.1$  Hz, 2H), 4.03–3.84 (m, 3H), 3.66 (d,  $J = 10.1$  Hz, 1H), 2.98–2.75 (m, 2H), 1.26 (t,  $J = 7.1$  Hz, 3H), 1.04 (t,  $J = 7.1$  Hz, 3H).  $^{13}\text{C NMR}$  (101 MHz,  $\text{CDCl}_3$ ):  $\delta$  201.0, 168.2, 167.9, 155.3, 131.3, 129.4, 115.7, 62.0, 61.8, 57.9, 47.7, 39.0, 14.1, 13.9. **HRMS** (ESI):  $m/z$  calcd for  $\text{C}_{16}\text{H}_{20}\text{O}_6 + \text{Na}^+$ : 331.1158  $[\text{M} + \text{Na}]^+$ ; found: 331.1153.

**(S)-Diethyl 2-(1-(4-cyanophenyl)-2-formylethyl)malonate (3h)** Yellow oil (17% isolated yield).  $[\alpha]_D^{21.1} = +8.00$  (*c* 1.0, MeOH).  $^1\text{H NMR}$  (400 MHz,  $\text{CDCl}_3$ ):  $\delta$  9.61 (s, 1H), 7.59 (d,  $J = 8.2$  Hz, 2H), 7.39 (d,  $J = 8.2$  Hz, 2H), 4.20 (q,  $J = 7.1$  Hz, 2H), 4.07 (td,  $J = 9.4, 4.6$  Hz, 1H), 4.03–3.93 (m, 2H), 3.71 (d,  $J = 9.8$  Hz, 1H), 3.08–2.89 (m, 2H), 1.26 (t,  $J = 7.1$  Hz, 3H), 1.04 (t,  $J = 7.1$  Hz, 3H).  $^{13}\text{C NMR}$  (101 MHz,  $\text{CDCl}_3$ ):  $\delta$  198.8, 167.7, 167.2, 145.9, 132.5, 129.3, 118.6, 111.6, 62.2, 61.9, 56.8, 47.3, 39.2, 14.1, 13.9. **HRMS** (ESI):  $m/z$  calcd for  $\text{C}_{17}\text{H}_{19}\text{NO}_5 + \text{Na}^+$ : 340.1161  $[\text{M} + \text{Na}]^+$ ; found: 340.1157.

**(S)-Diethyl 2-(2-formyl-1-(2-methoxyphenyl)ethyl)malonate (3i)** Yellow oil (73% isolated yield).  $[\alpha]_D^{22.8} = +9.60$  (*c* 0.5, EtOAc).  $^1\text{H NMR}$  (400 MHz,  $\text{CDCl}_3$ ):  $\delta$  9.60 (dd,  $J = 2.6, 1.6$  Hz, 1H), 7.23–7.11 (m, 2H), 6.90–6.73 (m, 2H), 4.19 (dt,  $J = 7.2, 6.5$  Hz, 3H), 4.06 (d,  $J = 10.2$  Hz, 1H), 3.93 (q,  $J = 7.1$  Hz, 2H), 3.85 (s, 3H), 3.07–2.80 (m, 2H), 1.25 (t,  $J = 7.1$  Hz, 3H), 0.99 (t,  $J = 7.1$  Hz, 3H).  $^{13}\text{C NMR}$  (101 MHz,  $\text{CDCl}_3$ ):  $\delta$  201.3, 168.6, 168.0, 157.5, 130.3, 128.9, 127.4, 120.8, 111.1, 61.8, 61.4, 55.4, 55.2, 46.0, 36.5, 14.2, 13.9. **HRMS** (ESI):  $m/z$  calcd for  $\text{C}_{17}\text{H}_{22}\text{O}_6 + \text{Na}^+$ : 345.1314  $[\text{M} + \text{Na}]^+$ ; found: 345.1309.

**(S)-Diethyl 2-(2-formyl-1-(2-chlorophenyl)ethyl)malonate (3j)** Colorless oil (79% isolated yield).  $[\alpha]_D^{22.6} = +7.00$  (*c* 0.5, EtOAc).  $^1\text{H NMR}$  (400 MHz,  $\text{CDCl}_3$ ):  $\delta$  9.63 (t,  $J = 1.8$  Hz, 1H), 7.45–7.04 (m, 4H), 4.66–4.38 (m, 1H), 4.33–4.14 (m, 2H), 4.14–3.88 (m, 3H), 3.12–2.90 (m, 2H), 1.23 (t,  $J = 7.1$  Hz, 3H), 1.07 (t,  $J = 7.1$  Hz, 3H).  $^{13}\text{C NMR}$  (101 MHz,  $\text{CDCl}_3$ ):  $\delta$  200.0, 168.0, 167.5, 137.4, 134.1, 130.3, 129.4, 128.8, 127.2, 61.9, 61.8, 55.5, 46.3, 36.1, 14.1, 13.9. **HRMS** (ESI):  $m/z$  calcd for  $\text{C}_{16}\text{H}_{19}\text{ClO}_5 + \text{Na}^+$ : 349.0819  $[\text{M} + \text{Na}]^+$ ; found: 349.0813.

**(S)-Diethyl 2-(1-(3-chlorophenyl)-2-formylethyl)malonate (3k)** Colorless oil (84% isolated yield).  $[\alpha]_D^{22.4} = +14.80$  (*c* 1.0, EtOAc).  $^1\text{H NMR}$  (400 MHz,  $\text{CDCl}_3$ ):  $\delta$  9.60 (t,  $J = 1.5$  Hz, 1H), 7.29–7.07 (m, 4H), 4.19 (q,  $J = 7.1$  Hz, 2H), 3.98 (q,  $J = 7.2$  Hz, 3H), 3.67 (d,  $J = 9.8$  Hz, 1H), 3.00–2.79 (m, 2H), 1.25 (t,  $J = 7.1$  Hz, 3H), 1.04 (t,  $J = 7.1$  Hz, 3H).  $^{13}\text{C NMR}$  (101 MHz,  $\text{CDCl}_3$ ):  $\delta$  199.5, 167.9, 167.4, 142.2, 134.5, 130.1, 128.4, 127.8, 126.6,

62.0, 61.7, 57.2, 47.3, 39.1, 14.1, 13.9. **HRMS** (ESI):  $m/z$  calcd for  $C_{16}H_{19}ClO_5+Na^+$ : 349.0819  $[M+Na]^+$ ; found: 349.0813.

**(S)-Diethyl 2-(1-(3-bromophenyl)-2-formylethyl)malonate (3l)** Yellow oil (54% isolated yield).  $[\alpha]_D^{25.4} = +16.10$  ( $c$  1.0, EtOAc).  **$^1H$  NMR** (400 MHz,  $CDCl_3$ ):  $\delta$  9.61 (t,  $J = 1.5$  Hz, 1H), 7.44–7.31 (m, 2H), 7.23–7.12 (m, 2H), 4.20 (q,  $J = 7.1$  Hz, 2H), 3.99 (q,  $J = 7.1$  Hz, 3H), 3.68 (d,  $J = 9.8$  Hz, 1H), 3.01–2.83 (m, 2H), 1.26 (t,  $J = 7.1$  Hz, 3H), 1.05 (t,  $J = 7.1$  Hz, 3H).  **$^{13}C$  NMR** (101 MHz,  $CDCl_3$ ):  $\delta$  199.5, 167.9, 167.4, 142.5, 131.4, 130.8, 130.4, 127.1, 122.8, 62.1, 61.8, 57.3, 47.4, 39.1, 14.2, 13.9. **HRMS** (ESI):  $m/z$  calcd for  $C_{16}H_{19}BrO_5+Na^+$ : 393.0314  $[M+Na]^+$ ; found: 393.0309.

**(S)-Diethyl 2-(1-(3-methylphenyl)-2-formylethyl)malonate (3m)** Yellow oil (66% isolated yield).  $[\alpha]_D^{21.5} = +14.20$  ( $c$  1.0, EtOAc).  **$^1H$  NMR** (400 MHz,  $CDCl_3$ ):  $\delta$  9.58 (t,  $J = 1.9$  Hz, 1H), 7.23–7.09 (m, 1H), 7.02 (d,  $J = 10.0$  Hz, 3H), 4.20 (q,  $J = 7.1$  Hz, 2H), 3.95 (q,  $J = 7.0$  Hz, 3H), 3.69 (d,  $J = 10.0$  Hz, 1H), 3.00–2.74 (m, 2H), 2.30 (s, 3H), 1.26 (t,  $J = 7.1$  Hz, 3H), 1.01 (t,  $J = 7.1$  Hz, 3H).  **$^{13}C$  NMR** (101 MHz,  $CDCl_3$ ):  $\delta$  200.4, 168.2, 167.6, 139.8, 138.4, 129.0, 128.7, 128.4, 125.2, 61.9, 61.5, 57.7, 47.5, 39.6, 21.5, 14.1, 13.9. **HRMS** (ESI):  $m/z$  calcd for  $C_{17}H_{22}O_5+Na^+$ : 329.1365  $[M+Na]^+$ ; found: 329.1360.

**(S)-Diethyl 2-(1-(3-cyanophenyl)-2-formylethyl)malonate (3n)** Yellow oil (29% isolated yield).  $[\alpha]_D^{25.4} = +14.80$  ( $c$  0.5, EtOAc).  **$^1H$  NMR** (500 MHz,  $CDCl_3$ ):  $\delta$  9.62 (s, 1H), 7.59–7.49 (m, 3H), 7.41 (t,  $J = 7.7$  Hz, 1H), 4.21 (qd,  $J = 7.1, 1.1$  Hz, 2H), 4.05 (td,  $J = 9.5, 4.5$  Hz, 1H), 3.98 (qd,  $J = 7.1, 1.7$  Hz, 2H), 3.70 (d,  $J = 9.7$  Hz, 1H), 3.07–2.91 (m, 2H), 1.26 (t,  $J = 7.1$  Hz, 3H), 1.05 (t,  $J = 7.1$  Hz, 3H).  **$^{13}C$  NMR** (126 MHz,  $CDCl_3$ ):  $\delta$  198.9, 167.7, 167.2, 142.0, 133.2, 132.0, 131.3, 129.6, 118.6, 112.9, 62.2, 61.9, 56.9, 47.3, 38.8, 14.14, 14.0. **HRMS** (ESI):  $m/z$  calcd for  $C_{17}H_{19}NO_5+Na^+$ : 340.1161  $[M+Na]^+$ ; found: 340.1156.

**(S)-Diethyl 2-(1-(3-methoxy-4-hydroxyphenyl)-2-formylethyl)malonate (3o)** Yellow oil (53% isolated yield).  $[\alpha]_D^{25.3} = +10.80$  ( $c$  1.0, EtOAc).  **$^1H$  NMR** (500 MHz,  $CDCl_3$ ):  $\delta$  9.64–9.53 (m, 1H), 6.81 (d,  $J = 8.1$  Hz, 1H), 6.76–6.70 (m, 2H), 5.57 (s, 1H), 4.23–4.15 (m, 2H), 4.00–3.91 (m, 3H), 3.86 (s, 3H), 3.67 (d,  $J = 10.0$  Hz, 1H), 2.92–2.79 (m, 2H), 1.26 (t,  $J = 7.1$  Hz, 3H), 1.04 (t,  $J = 7.1$  Hz, 3H).  **$^{13}C$  NMR** (126 MHz,  $CDCl_3$ ):  $\delta$  200.5, 168.2, 167.6, 146.6, 145.0, 131.7, 120.8, 114.6, 111.0, 61.9, 61.6, 57.9, 56.1, 47.7, 39.4, 14.2, 14.0. **HRMS** (ESI):  $m/z$  calcd for  $C_{17}H_{22}O_7+Na^+$ : 361.1263  $[M+Na]^+$ ; found: 361.1257.

**(S)-Diethyl 2-(1-formylpentan-2-yl)malonate (3p)** Colorless oil (26% isolated yield).  $[\alpha]_D^{20.0} = +7.40$  ( $c$  1.0, EtOAc).  **$^1H$  NMR** (400 MHz,  $CDCl_3$ ):  $\delta$  9.74 (t,  $J = 1.5$  Hz, 1H), 4.18 (q,  $J = 6.9$  Hz, 4H), 3.50 (d,  $J = 6.0$  Hz, 1H), 2.81–2.65 (m, 2H), 2.58–2.42 (m, 1H), 1.39–1.22 (m, 10H), 0.89 (t,  $J = 7.0$  Hz, 3H).  **$^{13}C$  NMR** (101 MHz,  $CDCl_3$ ):  $\delta$  201.4, 168.9, 168.6, 61.6, 61.5, 54.6, 46.0, 34.8, 32.4, 20.2, 14.2, 14.1. **HRMS** (ESI):  $m/z$  calcd for  $C_{13}H_{22}O_5+Na^+$ : 281.1365  $[M+Na]^+$ ; found: 281.1360.

### III. Chemical synthesis and analysis

#### General information

Chemicals were purchased from Bidepharm, Sigma Aldrich, Macklin, Merck or Fluka (unless noted otherwise) and were used without further purification. The  $\alpha,\beta$ -unsaturated aldehydes **1e**, **1h**, **1l-n** were prepared using previously reported methods using the Wittig reaction.<sup>[7]</sup> The racemic reference compounds, required for chiral analysis of enzymatic products, was synthesized according to the published protocols.<sup>[8]</sup> Lithium 4-fluorobenzoate was prepared by the reaction of lithium methoxide and corresponding 4-fluorobenzoic acid.

NMR spectra were recorded on a Bruker 400 MHz spectrometer. Chiral HPLC analysis was performed on a Shimadzu LC-20AD instrument using Daicel Chiralcel columns at 35 °C and a mixture of HPLC-grade hexanes and isopropanol as eluent. For reactions that require heating, oil bath was used in all procedures. Yields refer to chromatographically and spectroscopically (<sup>1</sup>H NMR) homogeneous materials. Reactions were monitored by thin-layer chromatography (TLC) carried out on 0.25 mm Tsingdao silica gel plates (GF-254) and visualized under UV light at 254 nm. Staining was performed with an ethanolic solution of phosphomolybdic acid (PMA) and cerium sulfate, or by oxidative staining with an aqueous basic potassium permanganate (KMnO<sub>4</sub>) solution and subsequent heating. Tsingdao silica gel (60, particle size 0.040–0.063 mm) was used for flash column chromatography. NMR spectra were recorded on either a Bruker Advance 400 (<sup>1</sup>H: 400 MHz, <sup>13</sup>C: 101 MHz) or Bruker Advance 500 (<sup>1</sup>H: 500 MHz, <sup>13</sup>C: 126 MHz) and were calibrated using residual undeuterated solvent as an internal reference (CDCl<sub>3</sub>: <sup>1</sup>H NMR = 7.26 ppm, <sup>13</sup>C NMR = 77.16 ppm). The following abbreviations were used to explain the multiplicities: s = singlet, d = doublet, t = triplet, q = quartet, m = multiplet, br = broad. High-resolution mass spectra (HRMS) were measured on ABI Q-star Elite. The ionization method is ESI and the mass analyzer type of TOF. Optical rotation values were recorded on a Rudolph Research Analytical Autopol I polarimeter (Rudolph Research Co.).

#### Chemical synthesis of $\alpha,\beta$ -unsaturated aldehydes

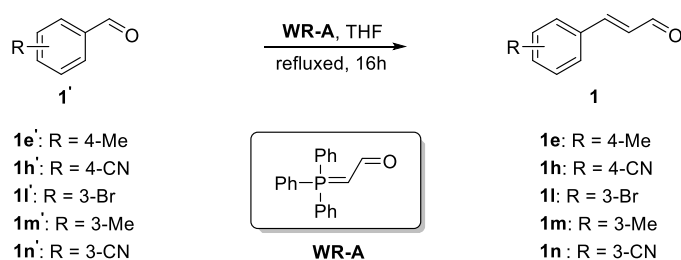

Compound **1e'**/**1h'**/**1l'**/**1m'**/**1n'** (12.5 mmol, 1.0 equiv) and **WR-A** (18.7 mmol, 1.5 equiv) were dissolved in THF (30 mL) under argon. The reaction mixture was heated at 70 °C for 16 h. After completion of the reaction, the mixture was cooled to room temperature, filtered, and concentrated under *vacuo*. The residue was purified by column chromatography (hexane/ethyl acetate from 30:1 to 15:1) on silica gel to give the desired  $\alpha,\beta$ -unsaturated aldehydes in 30%–71% yield.

**(E)-3-(4-methylphenyl)acrylaldehyde (1e)** Yellow oil.  $^1\text{H NMR}$  (500 MHz,  $\text{CDCl}_3$ ):  $\delta$  9.68 (d,  $J = 7.7$  Hz, 1H), 7.49–7.41 (m, 3H), 7.23 (d,  $J = 7.9$  Hz, 2H), 6.68 (dd,  $J = 15.9, 7.7$  Hz, 1H), 2.39 (s, 3H).  $^{13}\text{C NMR}$  (126 MHz,  $\text{CDCl}_3$ ):  $\delta$  193.9, 153.1, 142.1, 131.4, 130.0, 128.6, 127.8, 21.7. **HRMS** (ESI):  $m/z$  calcd for  $\text{C}_{10}\text{H}_{10}\text{O}+\text{Na}^+$ : 169.0629  $[M+\text{Na}]^+$ ; found: 169.0625.

**(E)-3-(4-cyanophenyl)acrylaldehyde (1h)** Yellow solid.  $^1\text{H NMR}$  (400 MHz,  $\text{CDCl}_3$ ):  $\delta$  9.76 (d,  $J = 7.5$  Hz, 1H), 7.73 (d,  $J = 8.5$  Hz, 2H), 7.66 (d,  $J = 8.4$  Hz, 2H), 7.48 (d,  $J = 16.1$  Hz, 1H), 6.77 (dd,  $J = 16.1, 7.5$  Hz, 1H).  $^{13}\text{C NMR}$  (101 MHz,  $\text{CDCl}_3$ ):  $\delta$  193.0, 149.6, 138.3, 133.0, 131.3, 128.9, 118.3, 114.4. **HRMS** (ESI):  $m/z$  calcd for  $\text{C}_{10}\text{H}_8\text{NO}^+$ : 158.0606  $[M+\text{H}]^+$ ; found: 158.0603.

**(E)-3-(3-bromophenyl)acrylaldehyde (1l)** Yellow solid.  $^1\text{H NMR}$  (400 MHz,  $\text{CDCl}_3$ ):  $\delta$  9.70 (d,  $J = 7.6$  Hz, 1H), 7.69 (t,  $J = 1.8$  Hz, 1H), 7.58–7.43 (m, 2H), 7.39 (d,  $J = 16.0$  Hz, 1H), 7.30 (t,  $J = 7.8$  Hz, 1H), 6.68 (dd,  $J = 16.0, 7.6$  Hz, 1H).  $^{13}\text{C NMR}$  (101 MHz,  $\text{CDCl}_3$ ):  $\delta$  193.3, 150.7, 136.1, 134.0, 131.3, 130.7, 129.7, 127.0, 123.3. **HRMS** (ESI):  $m/z$  calcd for  $\text{C}_9\text{H}_8\text{BrO}^+$ : 210.9759  $[M+\text{H}]^+$ ; found: 210.9755.

**(E)-3-(3-methylphenyl)acrylaldehyde (1m)** Yellow oil.  $^1\text{H NMR}$  (400 MHz,  $\text{CDCl}_3$ ):  $\delta$  9.70 (d,  $J = 7.7$  Hz, 1H), 7.49–7.29 (m, 4H), 7.25 (s, 1H), 6.71 (dd,  $J = 15.9, 7.7$  Hz, 1H), 2.40 (s, 3H).  $^{13}\text{C NMR}$  (101 MHz,  $\text{CDCl}_3$ ):  $\delta$  193.9, 153.2, 139.0, 134.1, 132.3, 129.2, 129.1, 128.6, 125.9, 21.4. **HRMS** (ESI):  $m/z$  calcd for  $\text{C}_{10}\text{H}_{11}\text{O}^+$ : 147.0810  $[M+\text{H}]^+$ ; found: 147.0805.

**(E)-3-(3-cyanophenyl)acrylaldehyde (1n)** White solid.  $^1\text{H NMR}$  (400 MHz,  $\text{CDCl}_3$ ):  $\delta$  9.75 (d,  $J = 7.4$  Hz, 1H), 7.89–7.76 (m, 2H), 7.76–7.69 (m, 1H), 7.58 (t,  $J = 7.8$  Hz, 1H), 7.46 (d,  $J = 16.1$  Hz, 1H), 6.75 (dd,  $J = 16.1, 7.5$  Hz, 1H).  $^{13}\text{C NMR}$  (101 MHz,  $\text{CDCl}_3$ ):  $\delta$  193.0, 149.3, 135.4, 134.2, 132.1, 131.9, 130.7, 130.2, 118.0, 113.8. **HRMS** (ESI):  $m/z$  calcd for  $\text{C}_{10}\text{H}_8\text{NO}^+$ : 158.0606  $[M+\text{H}]^+$ ; found: 158.0602.

### General Procedure for the Michael Addition

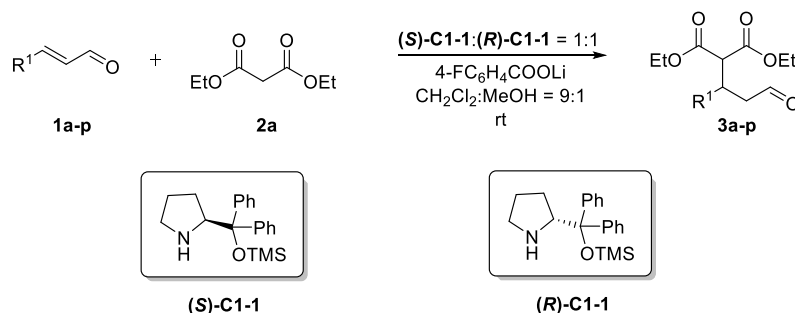

To a mixture of dichloromethane and methanol (2.0 mL, 9:1, v:v) was added  $\alpha,\beta$ -unsaturated aldehyde **1a-p** (1.0 mmol), diethyl malonate **2a** (3.0 mmol), catalyst **(R)-C1-1** (2 mg, 0.005 mmol), **(S)-C1-1** (2 mg, 0.005 mmol) and lithium 4-fluorobenzoate (7.3 mg, 0.05 mmol). The reaction mixture was stirred at room temperature for

48–60 h until the  $\alpha,\beta$ -unsaturated aldehyde was almost consumed. Water (5.0 mL) was added to the reaction mixture. Then the mixture was extracted with dichloromethane (3.0 mL) three times. The organic phases were combined, dried over anhydrous sodium sulfate, filtered, and evaporated under *vacuo*. The residue was purified by column chromatography (hexane/ethyl acetate, 20:1 to 5:1) on silica gel to give the corresponding racemic products **3a-p**.

### Oxidation of the aldehydes to the carboxylic esters

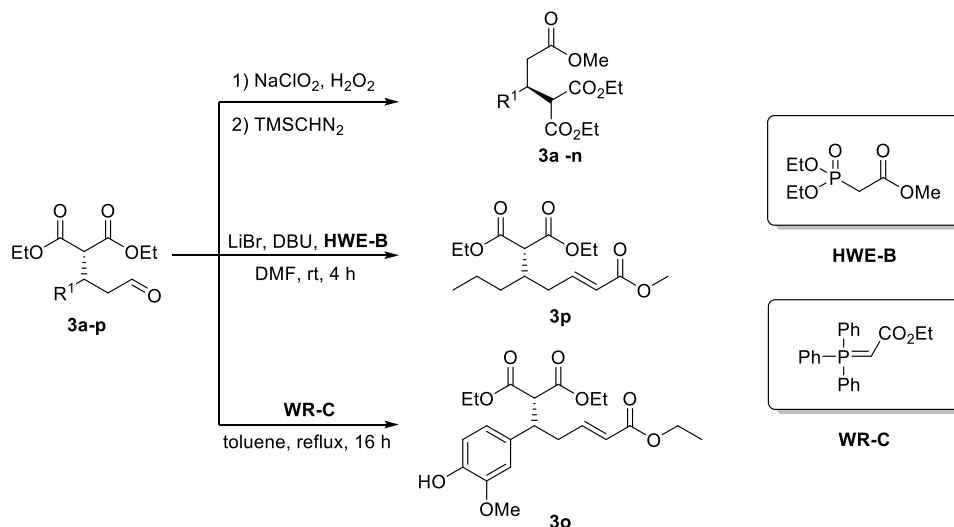

Method A: <sup>[9]</sup>

To a solution of **3a-n** (0.17 mmol, 1.0 equiv) in methanol/acetonitrile/water (1.0 mL/1.0 mL/1.0 mL) at 0 °C was added  $\text{KH}_2\text{PO}_4$  (63 mg, 0.46 mmol, 2.7 equiv) and  $\text{NaClO}_2$  (80%, 56 mg, 0.43 mmol, 2.5 equiv). After aqueous  $\text{H}_2\text{O}_2$  (30%, 0.6 mL) was added, the mixture was warmed up to room temperature and stirred for 2 h. The pH was adjusted to 3.0 with 1 M HCl before saturated aqueous  $\text{Na}_2\text{SO}_3$  (5 mL) was added slowly. The resulting mixture was extracted 3 times with 10 mL dichloromethane, the organic layers were combined, washed with 10 mL of water, dried over sodium sulfate, and concentrated under *vacuo*. The crude product was dissolved in toluene (2.0 mL) and MeOH (5.0 mL). Trimethylsilyldiazomethane (2.0 M in *n*-hexane) was added dropwise until the yellow color persisted. The solution was stirred for an additional 30 min and quenched with a drop of concentrated acetic acid. The solvent was evaporated under *vacuo*. The crude product was purified by column chromatography on silica gel to get the desired product **3a'-n'**.

Method B: <sup>[8, 10]</sup>

To a solution of **3p** (0.1 mmol, 1.0 equiv) in DMF (1 mL), lithium bromide (0.15 mmol, 1.5 equiv), **HWE-B** (0.15 mmol, 1.5 equiv), and DBU (0.15 mmol, 1.5 equiv) were added. The reaction mixture was stirred for 4 h at room temperature and passed directly through a silica gel column to give the desired product **3p'**.

Method C: <sup>[11]</sup>



To a solution of **3o** (5.0 mmol, 1.0 equiv) in toluene (25 mL) was added the Wittig reagent **WR-C** (7.5 mmol, 1.5 equiv) at room temperature. The reaction mixture was refluxed for 16 h. After completion of the reaction, the solvent was evaporated under *vacuo*. The residue was purified by column chromatography to give the desired product **3o'**.

**(S)-2-Ethylloxycarbonyl-3-phenylpentanedioic acid 5-ethyl ester 1-methyl ester (3a')** Colorless oil. <sup>1</sup>H NMR (400 MHz, CDCl<sub>3</sub>): δ 7.31–7.16 (m, 5H), 4.21 (q, *J* = 7.1 Hz, 2H), 3.93 (q, *J* = 7.2 Hz, 3H), 3.74 (d, *J* = 10.3 Hz, 1H), 3.53 (s, 3H), 2.92–2.64 (m, 2H), 1.26 (t, *J* = 7.1 Hz, 3H), 0.99 (t, *J* = 7.1 Hz, 3H). <sup>13</sup>C NMR (101 MHz, CDCl<sub>3</sub>): δ 171.7, 168.2, 167.6, 140.0, 128.6, 128.2, 127.5, 61.8, 61.5, 57.4, 51.7, 41.6, 38.7, 14.2, 13.8. HRMS (ESI): *m/z* calcd for C<sub>17</sub>H<sub>22</sub>O<sub>6</sub>+Na<sup>+</sup>: 345.1314 [*M*+Na]<sup>+</sup>; found: 345.1309. HPLC: Daicel Chiralpak AD-H, hexane / 2-propanol (95/5), flow rate: 0.5 mL /min, λ = 254 nm, (τ<sub>minor</sub> = 27.037 min, τ<sub>major</sub> = 42.024 min).

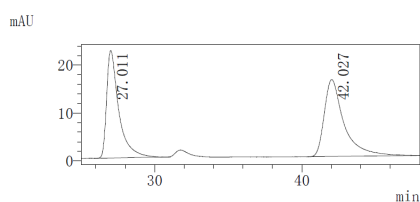

| Peak# | Ret. Time | Area    | Area%   |
|-------|-----------|---------|---------|
| 1     | 27.011    | 1279940 | 45.940  |
| 2     | 42.027    | 1506161 | 54.060  |
| 总计    |           | 2786102 | 100.000 |

racemic mixture of **3a'**

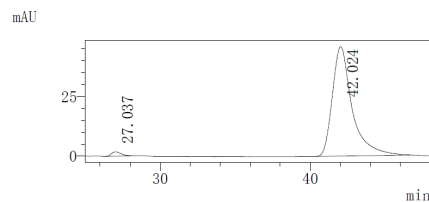

| Peak# | Ret. Time | Area    | Area%   |
|-------|-----------|---------|---------|
| 1     | 27.037    | 79445   | 1.860   |
| 2     | 42.024    | 4192731 | 98.140  |
| 总计    |           | 4272176 | 100.000 |

**3a'**

**(S)-2-Ethylloxycarbonyl-3-(4-fluorophenyl)pentanedioic acid 5-ethyl ester 1-methyl ester (3b')** Colorless oil. <sup>1</sup>H NMR (400 MHz, CDCl<sub>3</sub>): δ 7.22 (dd, *J* = 8.6, 5.4 Hz, 2H), 6.96 (t, *J* = 8.7 Hz, 2H), 4.21 (q, *J* = 7.1 Hz, 2H), 4.00–3.86 (m, 3H), 3.69 (d, *J* = 10.2 Hz, 1H), 3.53 (s, 3H), 2.88–2.66 (m, 2H), 1.26 (t, *J* = 7.1 Hz, 3H), 1.02 (t, *J* = 7.1 Hz, 3H). <sup>13</sup>C NMR (101 MHz, CDCl<sub>3</sub>): δ 171.6, 168.0, 167.5, 163.3, 160.9, 135.7, 135.7, 129.9, 129.8, 115.6, 115.3, 61.9, 61.6, 57.4, 51.8, 40.8, 38.7, 14.2, 13.9. HRMS (ESI): *m/z* calcd for C<sub>17</sub>H<sub>21</sub>FO<sub>6</sub>+Na<sup>+</sup>: 363.1220 [*M*+Na]<sup>+</sup>; found: 363.1214. HPLC: Daicel Chiralpak AD-H, hexane / 2-propanol (80/20), flow rate: 0.5 mL /min, λ = 254 nm, (τ<sub>minor</sub> = 6.431 min, τ<sub>major</sub> = 10.584 min).

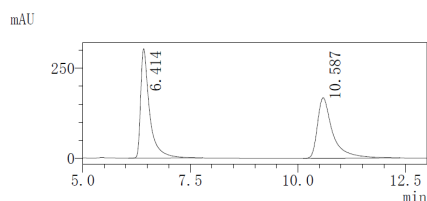

| Peak# | Ret. Time | Area    | Area%   |
|-------|-----------|---------|---------|
| 1     | 6.414     | 4373875 | 51.408  |
| 2     | 10.587    | 4134228 | 48.592  |
| 总计    |           | 8508103 | 100.000 |

racemic mixture of **3b'**

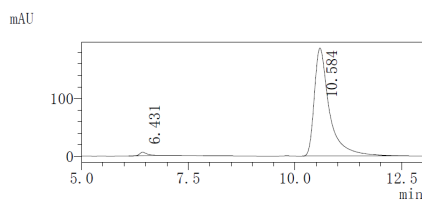

| Peak# | Ret. Time | Area    | Area%   |
|-------|-----------|---------|---------|
| 1     | 6.431     | 69190   | 1.479   |
| 2     | 10.584    | 4608360 | 98.521  |
| 总计    |           | 4677550 | 100.000 |

**3b'**

**(S)-2-Ethylloxycarbonyl -3-(4-chlorophenyl)petanedioic acid 5-ethyl ester 1-methyl ester (3c')** Colorless oil. <sup>1</sup>H NMR (400 MHz, CDCl<sub>3</sub>): δ 7.28–7.15 (m, 4H), 4.21 (q, *J* = 7.3 Hz, 2H), 4.01–3.84 (m, 3H), 3.69 (d, *J* = 10.2 Hz, 1H), 3.54 (s, 3H), 2.89–2.66 (m, 2H), 1.26 (t, *J* = 7.1 Hz, 3H), 1.03 (t, *J* = 7.1 Hz, 3H). <sup>13</sup>C NMR (101 MHz, CDCl<sub>3</sub>): δ 171.5, 167.9, 167.4, 138.6, 133.3, 129.7, 128.8, 62.0, 61.6, 57.2, 51.8, 40.9, 38.5, 14.2, 13.9. **HRMS** (ESI): *m/z* calcd for C<sub>17</sub>H<sub>21</sub>ClO<sub>6</sub>+Na<sup>+</sup>: 379.0924 [*M*+Na]<sup>+</sup>; found: 379.0919. **HPLC**: Daicel Chiralpak AD-H, hexane / 2-propanol (80/20), flow rate: 0.5 mL /min, λ = 211 nm, (τ<sub>minor</sub> = 6.896 min, τ<sub>major</sub> = 10.652 min).

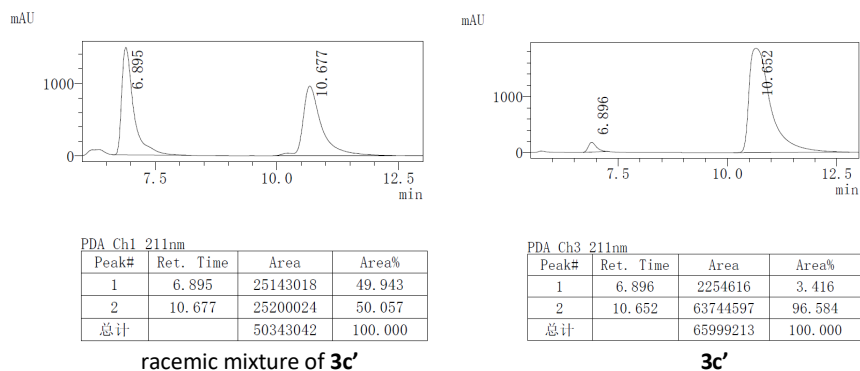

**(S)-2-Ethylloxycarbonyl -3-(4-bromophenyl)petanedioic acid 5-ethyl ester 1-methyl ester (3d')** Colorless oil. <sup>1</sup>H NMR (400 MHz, CDCl<sub>3</sub>): δ 7.40 (d, *J* = 8.5 Hz, 2H), 7.13 (d, *J* = 8.5 Hz, 2H), 4.21 (q, *J* = 6.9 Hz, 2H), 3.96 (q, *J* = 7.1 Hz, 2H), 3.89 (td, *J* = 10.1, 4.5 Hz, 1H), 3.69 (d, *J* = 10.1 Hz, 1H), 3.54 (s, 3H), 2.88 – 2.67 (m, 2H), 1.26 (d, *J* = 7.2 Hz, 3H), 1.04 (t, *J* = 7.1 Hz, 3H). <sup>13</sup>C NMR (101 MHz, CDCl<sub>3</sub>): δ 171.5, 167.9, 167.4, 139.1, 131.7, 130.1, 121.4, 62.0, 61.7, 57.1, 51.8, 41.0, 38.4, 14.2, 13.9. **HRMS** (ESI): *m/z* calcd for C<sub>17</sub>H<sub>21</sub>BrO<sub>6</sub>+Na<sup>+</sup>: 423.0419 [*M*+Na]<sup>+</sup>; found: 423.0414. **HPLC**: Daicel Chiralpak AD-H, hexane / 2-propanol (80/20), flow rate: 0.5 mL /min, λ = 210 nm, (τ<sub>minor</sub> = 14.586 min, τ<sub>major</sub> = 22.517 min).

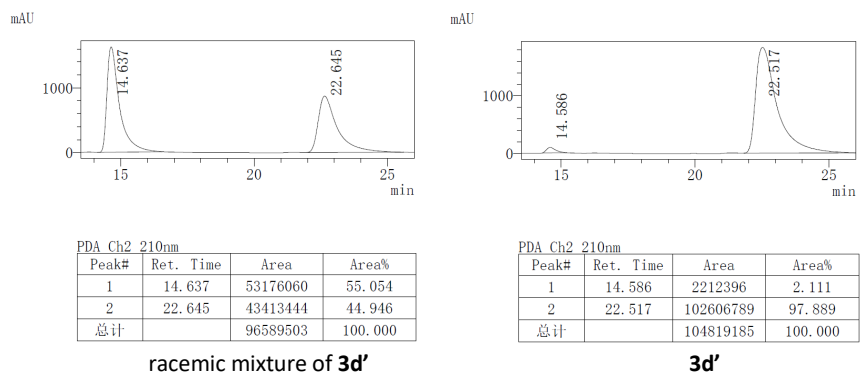

**(S)-2-Ethylloxycarbonyl -3-(4-methylphenyl)petanedioic acid 5-ethyl ester 1-methyl ester (3e')** Colorless oil. <sup>1</sup>H NMR (400 MHz, CDCl<sub>3</sub>): δ 7.16–7.03 (m, 4H), 4.21 (q, *J* = 6.8 Hz, 2H), 3.98–3.83 (m, 3H), 3.71 (d, *J* = 10.2 Hz, 1H), 3.53 (s, 3H), 2.87–2.68 (m, 2H), 2.28 (s, 3H), 1.25 (d, *J* = 7.2 Hz, 3H), 1.01 (t, *J* = 7.1 Hz, 3H). <sup>13</sup>C NMR (101 MHz, CDCl<sub>3</sub>): δ 171.8, 168.2, 167.7, 137.0, 136.9, 129.2, 128.0, 61.8, 61.5, 57.5, 51.71, 41.2, 38.7, 21.2, 14.2, 13.9. **HRMS** (ESI): *m/z* calcd for C<sub>18</sub>H<sub>24</sub>O<sub>6</sub>+Na<sup>+</sup>: 359.1471 [*M*+Na]<sup>+</sup>; found: 359.1464. **HPLC**:

Daicel Chiralpak AD-H, hexane / 2-propanol (80/20), flow rate: 0.5 mL /min,  $\lambda = 254$  nm, ( $\tau_{\text{minor}} = 12.111$  min,  $\tau_{\text{major}} = 16.589$  min).

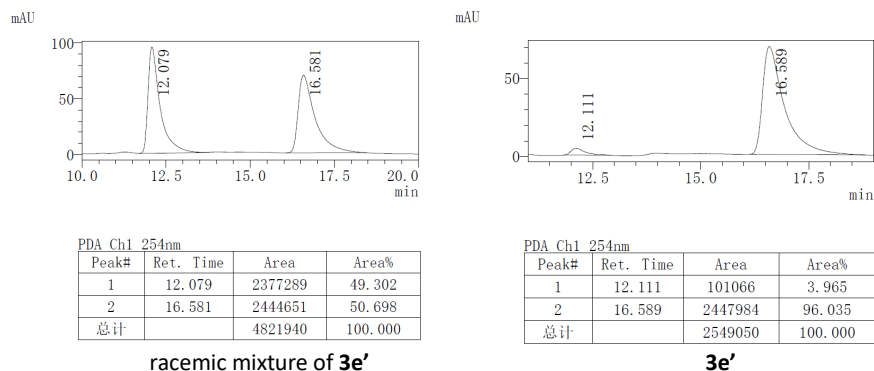

**(S)-2-Ethylloxycarbonyl -3-(4-methoxyphenyl)petanedioic acid 5-ethyl ester 1-methyl ester (3f')** Colorless oil.  $^1\text{H NMR}$  (400 MHz,  $\text{CDCl}_3$ ):  $\delta$  7.15 (d,  $J = 8.7$  Hz, 2H), 6.80 (d,  $J = 8.7$  Hz, 2H), 4.20 (q,  $J = 7.1$  Hz, 2H), 3.98–3.82 (m, 3H), 3.76 (s, 3H), 3.69 (d,  $J = 10.2$  Hz, 1H), 3.53 (s, 3H), 2.92–2.55 (m, 2H), 1.26 (t,  $J = 7.1$  Hz, 3H), 1.02 (t,  $J = 7.1$  Hz, 3H).  $^{13}\text{C NMR}$  (101 MHz,  $\text{CDCl}_3$ ):  $\delta$  171.8, 168.2, 167.7, 158.8, 131.9, 129.27, 113.9, 61.8, 61.4, 57.6, 55.3, 51.7, 40.8, 38.8, 14.2, 13.9. **HRMS** (ESI):  $m/z$  calcd for  $\text{C}_{18}\text{H}_{24}\text{O}_7 + \text{Na}^+$ : 375.1420  $[\text{M} + \text{Na}]^+$ ; found: 375.1416. **HPLC**: Daicel Chiralpak AD-H, hexane / 2-propanol (80/20), flow rate: 0.5 mL /min,  $\lambda = 254$  nm, ( $\tau_{\text{minor}} = 15.557$  min,  $\tau_{\text{major}} = 25.861$  min).

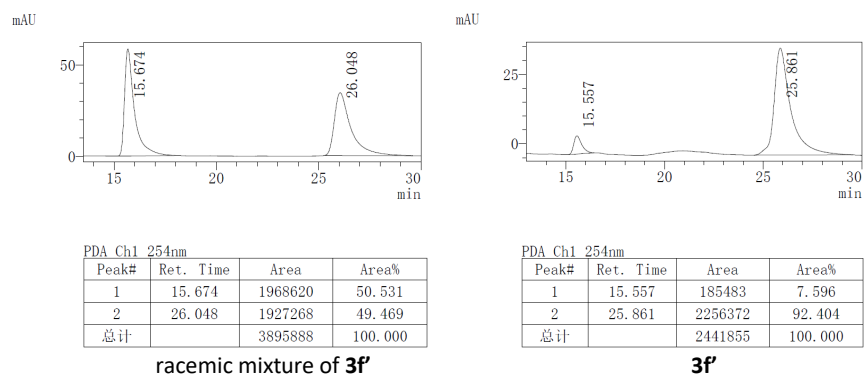

**(S)-2-Ethylloxycarbonyl -3-(4-hydroxyphenyl)petanedioic acid 5-ethyl ester 1-methyl ester (3g')** Colorless oil.  $^1\text{H NMR}$  (400 MHz,  $\text{CDCl}_3$ ):  $\delta$  7.08 (d,  $J = 8.6$  Hz, 2H), 6.66 (d,  $J = 8.6$  Hz, 2H), 4.25–4.17 (m, 2H), 3.95 (q,  $J = 7.1$  Hz, 2H), 3.85 (td,  $J = 10.2, 4.5$  Hz, 1H), 3.68 (d,  $J = 10.3$  Hz, 1H), 3.54 (s, 3H), 2.87–2.65 (m, 2H), 1.27 (t,  $J = 7.1$  Hz, 3H), 1.03 (t,  $J = 7.1$  Hz, 3H).  $^{13}\text{C NMR}$  (101 MHz,  $\text{CDCl}_3$ ):  $\delta$  172.1, 168.2, 167.9, 155.2, 131.5, 129.4, 115.5, 61.9, 61.6, 57.7, 51.8, 40.9, 39.0, 14.2, 13.9. **HRMS** (ESI):  $m/z$  calcd for  $\text{C}_{17}\text{H}_{22}\text{O}_7 + \text{Na}^+$ : 361.1263  $[\text{M} + \text{Na}]^+$ ; found: 361.1256. **HPLC**: Daicel Chiralpak AD-H, hexane / 2-propanol (80/20), flow rate: 0.5 mL /min,  $\lambda = 210$  nm, ( $\tau_{\text{minor}} = 13.468$  min,  $\tau_{\text{major}} = 18.935$  min).

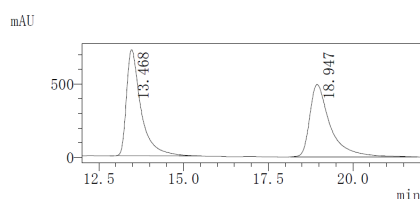

| PDA Ch2 210nm |           |          |         |
|---------------|-----------|----------|---------|
| Peak#         | Ret. Time | Area     | Area%   |
| 1             | 13.468    | 21505365 | 50.716  |
| 2             | 18.947    | 20898270 | 49.284  |
| 总计            |           | 42403635 | 100.000 |

racemic mixture of **3g'**

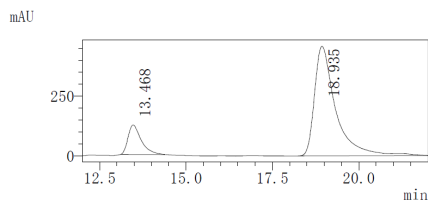

| PDA Ch2 210nm |           |          |         |
|---------------|-----------|----------|---------|
| Peak#         | Ret. Time | Area     | Area%   |
| 1             | 13.468    | 3259132  | 14.314  |
| 2             | 18.935    | 19509476 | 85.686  |
| 总计            |           | 22768608 | 100.000 |

**3g'**

**(S)-2-Ethylloxycarbonyl-3-(4-cyanophenyl)pentanedioic acid 5-ethyl ester 1-methyl ester (3h')** Colorless oil.  $^1\text{H NMR}$  (400 MHz,  $\text{CDCl}_3$ ):  $\delta$  7.58 (d,  $J = 8.2$  Hz, 2H), 7.38 (d,  $J = 8.2$  Hz, 2H), 4.21 (q,  $J = 7.0$  Hz, 2H), 4.02–3.89 (m, 3H), 3.73 (d,  $J = 10.0$  Hz, 1H), 3.54 (s, 3H), 2.94–2.70 (m, 2H), 1.26 (t,  $J = 7.1$  Hz, 3H), 1.03 (t,  $J = 7.2$  Hz, 3H).  $^{13}\text{C NMR}$  (101 MHz,  $\text{CDCl}_3$ ):  $\delta$  171.2, 167.6, 167.2, 145.8, 132.4, 129.3, 118.7, 111.5, 62.1, 61.8, 56.7, 51.9, 41.4, 38.0, 14.2, 13.9. **HRMS** (ESI):  $m/z$  calcd for  $\text{C}_{18}\text{H}_{21}\text{NO}_6 + \text{Na}^+$ : 370.1267  $[M + \text{Na}]^+$ ; found: 370.1262. **HPLC**: Daicel Chiralpak AD-H, hexane / 2-propanol (80/20), flow rate: 0.5 mL /min,  $\lambda = 254$  nm, ( $\tau_{\text{minor}} = 14.391$  min,  $\tau_{\text{major}} = 18.767$  min).

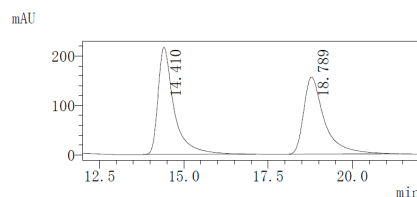

| PDA Ch1 254nm |           |          |         |
|---------------|-----------|----------|---------|
| Peak#         | Ret. Time | Area     | Area%   |
| 1             | 14.410    | 7199938  | 51.830  |
| 2             | 18.789    | 6691609  | 48.170  |
| 总计            |           | 13891547 | 100.000 |

racemic mixture of **3h'**

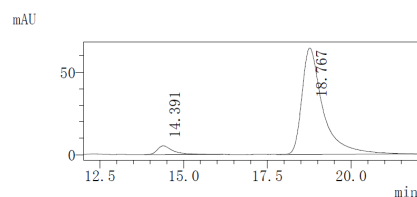

| PDA Ch1 254nm |           |         |         |
|---------------|-----------|---------|---------|
| Peak#         | Ret. Time | Area    | Area%   |
| 1             | 14.391    | 170707  | 5.703   |
| 2             | 18.767    | 2822786 | 94.297  |
| 总计            |           | 2993494 | 100.000 |

**3h'**

**(S)-2-Ethylloxycarbonyl-3-(2-methoxyphenyl)pentanedioic acid 5-ethyl ester 1-methyl ester (3i')** Colorless oil.  $^1\text{H NMR}$  (400 MHz,  $\text{CDCl}_3$ ):  $\delta$  7.21–7.11 (m, 2H), 6.83 (t,  $J = 7.0$  Hz, 2H), 4.23–4.15 (m, 2H), 4.12 (d,  $J = 10.3$  Hz, 1H), 4.09–3.98 (m, 1H), 3.90 (q,  $J = 7.1$  Hz, 2H), 3.84 (s, 3H), 3.52 (s, 3H), 3.04–2.74 (m, 2H), 1.24 (t,  $J = 7.2$  Hz, 3H), 0.97 (t,  $J = 7.1$  Hz, 3H).  $^{13}\text{C NMR}$  (101 MHz,  $\text{CDCl}_3$ ):  $\delta$  172.3, 168.6, 168.1, 157.7, 130.8, 128.6, 127.4, 120.5, 111.0, 61.6, 61.2, 55.4, 54.9, 51.6, 38.9, 36.4, 14.2, 13.9. **HRMS** (ESI):  $m/z$  calcd for  $\text{C}_{18}\text{H}_{24}\text{O}_7 + \text{Na}^+$ : 375.1420  $[M + \text{Na}]^+$ ; found: 375.1414. **HPLC**: Daicel Chiralpak AD-H, hexane / 2-propanol (95/5), flow rate: 0.5 mL /min,  $\lambda = 254$  nm, ( $\tau_{\text{minor}} = 28.476$  min,  $\tau_{\text{major}} = 31.869$  min).

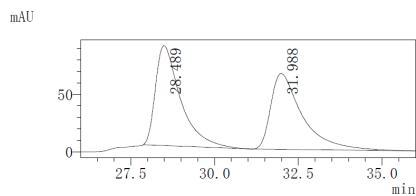

| PDA Ch1 254nm |           |         |         |
|---------------|-----------|---------|---------|
| Peak#         | Ret. Time | Area    | Area%   |
| 1             | 28.489    | 4526264 | 51.107  |
| 2             | 31.988    | 4330222 | 48.893  |
| 总计            |           | 8856485 | 100.000 |

racemic mixture of **3i'**

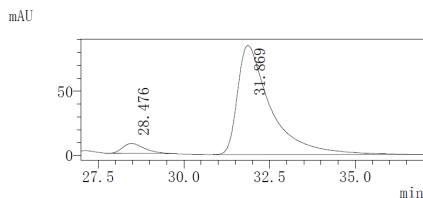

| PDA Ch1 254nm |           |         |         |
|---------------|-----------|---------|---------|
| Peak#         | Ret. Time | Area    | Area%   |
| 1             | 28.476    | 340623  | 5.643   |
| 2             | 31.869    | 5695979 | 94.357  |
| 总计            |           | 6036602 | 100.000 |

**3i'**

**(S)-2-Ethoxycarbonyl-3-(2-chlorophenyl)pentanedioic acid 5-ethyl ester 1-methyl ester (3j')** Colorless oil. <sup>1</sup>H NMR (400 MHz, CDCl<sub>3</sub>): δ 7.39–7.08 (m, 4H), 4.48–4.35 (m, 1H), 4.18 (qd, *J* = 7.1, 2.5 Hz, 2H), 4.01 (q, *J* = 7.2 Hz, 3H), 3.54 (s, 3H), 3.03–2.83 (m, 2H), 1.23 (t, *J* = 7.1 Hz, 3H), 1.06 (t, *J* = 7.1 Hz, 3H). <sup>13</sup>C NMR (101 MHz, CDCl<sub>3</sub>): δ 171.7, 168.0, 167.6, 137.5, 134.4, 130.2, 129.2, 128.6, 127.0, 61.8, 61.7, 55.3, 51.8, 37.9, 36.6, 14.2, 13.9. HRMS (ESI): *m/z* calcd for C<sub>17</sub>H<sub>21</sub>ClO<sub>6</sub>+Na<sup>+</sup>: 379.0924 [*M*+Na]<sup>+</sup>; found: 379.0919. HPLC: Daicel Chiralpak AD-H, hexane / 2-propanol (80/20), flow rate: 0.5 mL /min, λ = 254 nm, (τ<sub>minor</sub> = 16.564 min, τ<sub>major</sub> = 25.709 min).

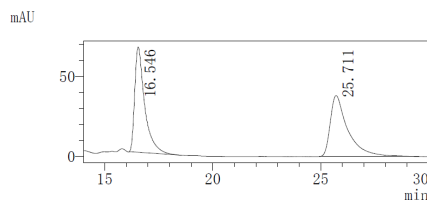

| PDA Ch1 254nm |           |         |         |
|---------------|-----------|---------|---------|
| Peak#         | Ret. Time | Area    | Area%   |
| 1             | 16.546    | 2112142 | 49.394  |
| 2             | 25.711    | 2163931 | 50.606  |
| 总计            |           | 4276073 | 100.000 |

racemic mixture of **3j'**

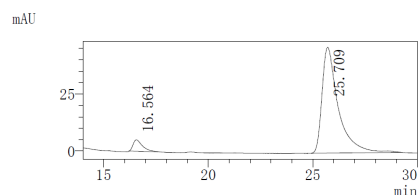

| PDA Ch1 254nm |           |         |         |
|---------------|-----------|---------|---------|
| Peak#         | Ret. Time | Area    | Area%   |
| 1             | 16.564    | 154394  | 5.797   |
| 2             | 25.709    | 2509137 | 94.203  |
| 总计            |           | 2663530 | 100.000 |

**3j'**

**(S)-2-Ethoxycarbonyl-3-(3-chlorophenyl)pentanedioic acid 5-ethyl ester 1-methyl ester (3k')** Colorless oil. <sup>1</sup>H NMR (400 MHz, CDCl<sub>3</sub>): δ 7.29–7.08 (m, 4H), 4.21 (q, *J* = 7.1 Hz, 2H), 3.97 (q, *J* = 7.1 Hz, 2H), 3.89 (td, *J* = 10.0, 4.5 Hz, 1H), 3.70 (d, *J* = 10.0 Hz, 1H), 3.55 (s, 3H), 2.94–2.64 (m, 2H), 1.26 (t, *J* = 7.1 Hz, 3H), 1.03 (t, *J* = 7.1 Hz, 3H). <sup>13</sup>C NMR (101 MHz, CDCl<sub>3</sub>): δ 171.4, 167.9, 167.4, 142.2, 134.3, 129.8, 128.5, 127.7, 126.6, 62.0, 61.7, 57.1, 51.8, 41.2, 38.3, 14.2, 13.9. HRMS (ESI): *m/z* calcd for C<sub>17</sub>H<sub>21</sub>ClO<sub>6</sub>+Na<sup>+</sup>: 379.0924 [*M*+Na]<sup>+</sup>; found: 379.0919. HPLC: Daicel Chiralpak AD-H, hexane / 2-propanol (95/5), flow rate: 0.5 mL /min, λ = 210 nm, (τ<sub>minor</sub> = 26.481 min, τ<sub>major</sub> = 33.312 min).

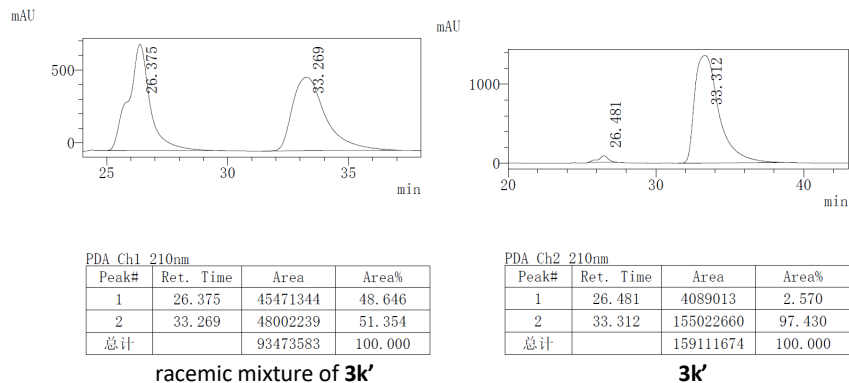

**(S)-2-Ethylloxycarbonyl -3-(3-bromophenyl)petanedioic acid 5-ethyl ester 1-methyl ester (3l')** Colorless oil.  $^1\text{H NMR}$  (400 MHz,  $\text{CDCl}_3$ ):  $\delta$  7.42–7.30 (m, 2H), 7.17 (dt,  $J = 15.4, 7.8$  Hz, 2H), 4.21 (q,  $J = 7.2$  Hz, 2H), 3.97 (q,  $J = 7.1$  Hz, 2H), 3.88 (td,  $J = 9.9, 4.6$  Hz, 1H), 3.70 (d,  $J = 10.0$  Hz, 1H), 3.55 (s, 3H), 2.89–2.67 (m, 2H), 1.26 (t,  $J = 7.1$  Hz, 3H), 1.03 (t,  $J = 7.1$  Hz, 3H).  $^{13}\text{C NMR}$  (101 MHz,  $\text{CDCl}_3$ ):  $\delta$  171.4, 167.9, 167.4, 142.5, 131.4, 130.6, 130.1, 127.1, 122.5, 62.0, 61.7, 57.1, 51.8, 41.1, 38.3, 14.2, 13.9. **HRMS** (ESI):  $m/z$  calcd for  $\text{C}_{17}\text{H}_{21}\text{BrO}_6 + \text{Na}^+$ : 423.0419 [ $M + \text{Na}$ ] $^+$ ; found: 423.0415. **HPLC**: Daicel Chiralpak AD-H, hexane / 2-propanol (80/20), flow rate: 0.5 mL /min,  $\lambda = 210$  nm, ( $\tau_{\text{minor}} = 12.402$  min,  $\tau_{\text{major}} = 14.795$  min).

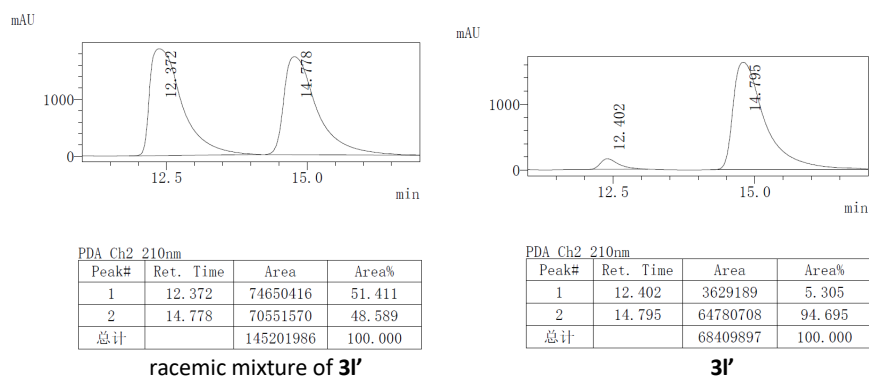

**(S)-2-Ethylloxycarbonyl -3-(3-methylphenyl)petanedioic acid 5-ethyl ester 1-methyl ester (3m')** Colorless oil.  $^1\text{H NMR}$  (400 MHz,  $\text{CDCl}_3$ ):  $\delta$  7.15 (dd,  $J = 8.2, 7.1$  Hz, 1H), 7.07–6.96 (m, 3H), 4.21 (q,  $J = 7.1$  Hz, 2H), 3.98–3.83 (m, 3H), 3.72 (d,  $J = 10.2$  Hz, 1H), 3.54 (s, 3H), 2.89–2.69 (m, 2H), 2.30 (s, 3H), 1.25 (d,  $J = 7.1$  Hz, 3H), 1.00 (t,  $J = 7.1$  Hz, 3H).  $^{13}\text{C NMR}$  (101 MHz,  $\text{CDCl}_3$ ):  $\delta$  171.8, 168.2, 167.7, 140.0, 138.0, 129.0, 128.4, 128.2, 125.2, 61.8, 61.4, 57.5, 51.7, 41.5, 38.7, 21.6, 14.2, 13.9. **HRMS** (ESI):  $m/z$  calcd for  $\text{C}_{18}\text{H}_{24}\text{O}_6 + \text{Na}^+$ : 359.1471 [ $M + \text{Na}$ ] $^+$ ; found: 359.1465. **HPLC**: Daicel Chiralpak AD-H, hexane / 2-propanol (80/20), flow rate: 0.5 mL /min,  $\lambda = 254$  nm, ( $\tau_{\text{minor}} = 11.255$  min,  $\tau_{\text{major}} = 14.060$  min).

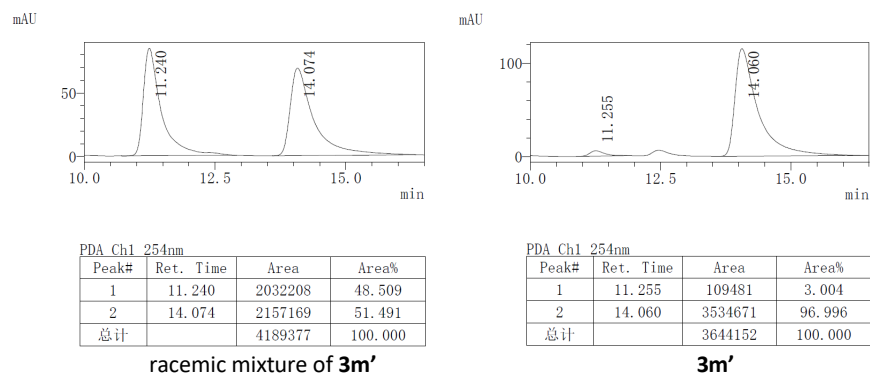

**(S)-2-Ethoxycarbonyl-3-(3-cyanophenyl)pentanedioic acid 5-ethyl ester 1-methyl ester (3n')** Colorless oil. <sup>1</sup>H NMR (400 MHz, CDCl<sub>3</sub>): δ 7.60–7.50 (m, 3H), 7.40 (dd, *J* = 8.3, 7.1 Hz, 1H), 4.22 (q, *J* = 7.1 Hz, 2H), 4.02–3.91 (m, 3H), 3.72 (d, *J* = 9.9 Hz, 1H), 3.55 (s, 3H), 2.89 (dd, *J* = 16.2, 4.4 Hz, 1H), 2.75 (dd, *J* = 16.1, 10.1 Hz, 1H), 1.27 (t, *J* = 7.1 Hz, 3H), 1.03 (t, *J* = 7.1 Hz, 3H). <sup>13</sup>C NMR (101 MHz, CDCl<sub>3</sub>): δ 171.2, 167.6, 167.2, 141.8, 133.1, 132.0, 131.3, 129.4, 118.7, 112.7, 62.1, 61.8, 56.8, 52.0, 41.0, 38.1, 14.2, 13.9. HRMS (ESI): *m/z* calcd for C<sub>18</sub>H<sub>21</sub>NO<sub>6</sub>+Na<sup>+</sup>: 370.1267 [*M*+Na]<sup>+</sup>; found: 370.1262. HPLC: Daicel Chiralpak AD-H, hexane / 2-propanol (80/20), flow rate: 0.5 mL/min, λ = 210 nm, (τ<sub>minor</sub> = 17.291 min, τ<sub>major</sub> = 23.543 min).

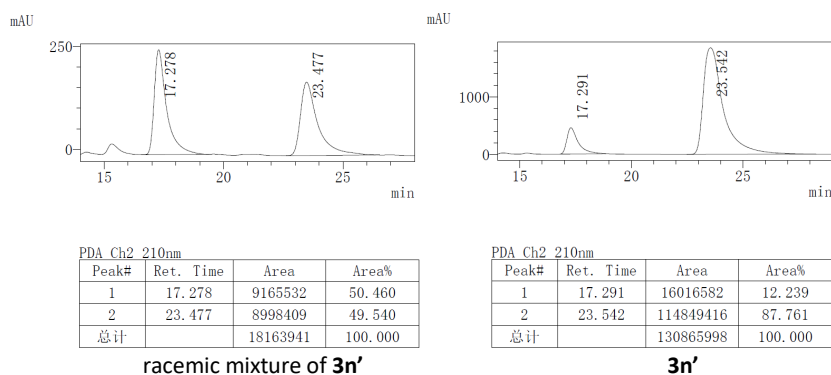

**(S,E)-1,1,5-triethyl 2-(4-hydroxy-3-methoxyphenyl)pent-4-ene-1,1,5-tricarboxylate (3o')** Yellow oil. <sup>1</sup>H NMR (400 MHz, CDCl<sub>3</sub>): δ 6.82 (d, *J* = 8.0 Hz, 1H), 6.68 (d, *J* = 7.7 Hz, 2H), 5.72 (d, *J* = 15.7 Hz, 1H), 5.53 (s, 1H), 4.22 (q, *J* = 7.1 Hz, 2H), 4.12 (q, *J* = 7.1 Hz, 2H), 4.02–3.91 (m, 2H), 3.85 (s, 3H), 3.64 (d, *J* = 10.5 Hz, 1H), 3.48 (td, *J* = 10.0, 4.4 Hz, 1H), 2.71–2.45 (m, 2H), 1.26 (dt, *J* = 18.5, 7.1 Hz, 6H), 1.00 (t, *J* = 7.1 Hz, 3H). <sup>13</sup>C NMR (101 MHz, CDCl<sub>3</sub>): δ 168.3, 167.7, 166.3, 146.5, 145.5, 144.8, 131.6, 123.6, 120.9, 114.5, 111.0, 61.8, 61.5, 60.4, 58.2, 56.1, 44.5, 36.9, 14.3, 14.2, 14.0. HRMS (ESI): *m/z* calcd for C<sub>21</sub>H<sub>28</sub>O<sub>8</sub>+Na<sup>+</sup>: 431.1682 [*M*+Na]<sup>+</sup>; found: 431.1677. HPLC: Daicel Chiralpak AD-H, hexane / 2-propanol (80/20), flow rate: 0.5 mL/min, λ = 254 nm, (τ<sub>minor</sub> = 19.516 min, τ<sub>major</sub> = 26.382 min).

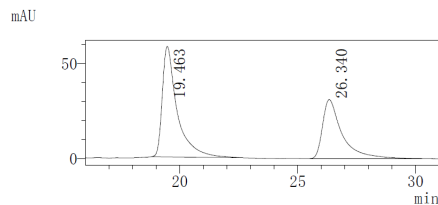

| Peak# | Ret. Time | Area    | Area%   |
|-------|-----------|---------|---------|
| 1     | 19.463    | 2541057 | 58.768  |
| 2     | 26.340    | 1782842 | 41.232  |
| 总计    |           | 4323899 | 100.000 |

racemic mixture of **3o'**

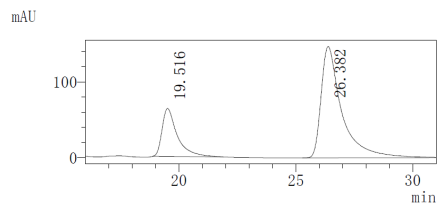

| Peak# | Ret. Time | Area     | Area%   |
|-------|-----------|----------|---------|
| 1     | 19.516    | 2845826  | 23.933  |
| 2     | 26.382    | 9044927  | 76.067  |
| 总计    |           | 11890752 | 100.000 |

**3o'**

**(*S,E*)-1,1-diethyl 5-methyl-2-propylpent-4-ene-1,1,5-tricarboxylate (3p')** Colorless oil.  $^1\text{H NMR}$  (400 MHz,  $\text{CDCl}_3$ ):  $\delta$  6.90 (dt,  $J = 15.6, 7.3$  Hz, 1H), 5.85 (d,  $J = 15.6$  Hz, 1H), 4.19 (q,  $J = 7.1$  Hz, 4H), 3.73 (s, 3H), 3.39 (d,  $J = 6.5$  Hz, 1H), 2.45–2.24 (m, 3H), 1.39–1.30 (m, 4H), 1.29–1.24 (m, 6H), 0.89 (q,  $J = 5.4, 4.5$  Hz, 3H).  $^{13}\text{C NMR}$  (101 MHz,  $\text{CDCl}_3$ ):  $\delta$  168.8, 168.7, 166.9, 146.9, 123.3, 61.5, 61.4, 54.8, 51.6, 37.5, 34.0, 33.5, 20.1, 14.2, 14.2. **HRMS** (ESI):  $m/z$  calcd for  $\text{C}_{16}\text{H}_{26}\text{O}_6 + \text{Na}^+$ : 337.1627 [ $M + \text{Na}$ ] $^+$ ; found: 337.1621. **HPLC**: Daicel Chiralpak AD-H, hexane / 2-propanol (99.5/0.5), flow rate: 0.5 mL /min,  $\lambda = 254$  nm, ( $\tau_{\text{minor}} = 31.141$  min,  $\tau_{\text{major}} = 34.089$  min).

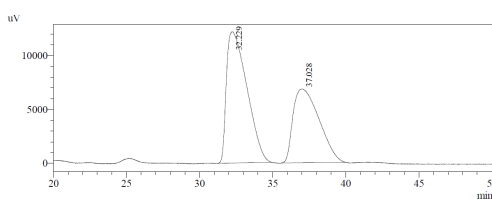

| Peak# | Ret. Time | Area    | Height | Area %  | Height % |
|-------|-----------|---------|--------|---------|----------|
| 1     | 32.229    | 1183482 | 12194  | 58.217  | 64.038   |
| 2     | 37.028    | 849389  | 6848   | 41.783  | 35.962   |
| Total |           | 2032871 | 19043  | 100.000 | 100.000  |

racemic mixture of **3p'**

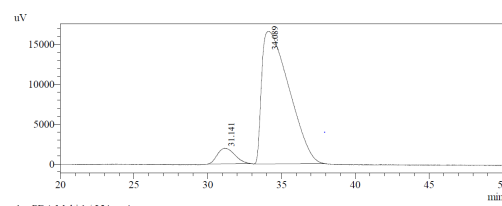

| Peak# | Ret. Time | Area    | Height | Area %  | Height % |
|-------|-----------|---------|--------|---------|----------|
| 1     | 31.141    | 161250  | 1964   | 7.019   | 10.561   |
| 2     | 34.089    | 2156147 | 16635  | 92.981  | 89.439   |
| Total |           | 2297397 | 18599  | 100.000 | 100.000  |

**3p'**

## Chemoenzymatic synthesis of (+)-femoxetine

Optimized conditions were implemented for the bio-transformation on the preparative scale (200 mL) and performed starting from the product **3a** (10 mM), methylamine (200 mM, in buffer adjusted to pH 8.0 with HCl), purified IR361 (50  $\mu\text{M}$ ), D-glucose (50 mM),  $\text{NADP}^+$  (0.5 mM), GDH (960 U) and Tris-HCl buffer (100 mM, pH 8.0) with 5% (v/v) DMSO. The reaction mixture was incubated at 30  $^\circ\text{C}$  with 180 r.p.m. shaking, and was monitored by GC-MS. After completion of the reaction, the mixture was extracted with ethyl acetate ( $3 \times 50$  mL) with centrifugation ( $6,000 \times g$ , 10 min) to improve the separation of the two phases. The organic layers were combined, dried over anhydrous sodium sulfate, filtered, and concentrated under *vacuo*. The residue was purified by column chromatography (hexane/ethyl acetate = 2:1) to provide **7** (177 mg, 34% yield) as colorless oil.  $[\alpha]_D^{24.5} = +12.20$  ( $c$  0.5,  $\text{CH}_2\text{Cl}_2$ ).  $^1\text{H NMR}$  (400 MHz,  $\text{CDCl}_3$ ):  $\delta$  7.31 (t,  $J = 7.3$  Hz, 2H), 7.25–7.16 (m,



3H), 4.05 (qd,  $J = 7.1, 2.8$  Hz, 2H), 3.52 (t,  $J = 11.2$  Hz, 2H), 3.48–3.37 (m, 1H), 3.33 (dd,  $J = 16.9, 3.8$  Hz, 1H), 3.00 (s, 3H), 2.10 (dd,  $J = 8.8, 4.5$  Hz, 2H), 1.06 (t,  $J = 7.1$  Hz, 3H).  $^{13}\text{C}$  NMR (101 MHz,  $\text{CDCl}_3$ ):  $\delta$  170.2, 166.0, 141.5, 128.9, 127.4, 127.0, 61.2, 56.5, 49.1, 42.8, 35.0, 29.5, 14.1. HRMS (ESI):  $m/z$  calcd for  $\text{C}_{15}\text{H}_{20}\text{NO}_3^+$ : 262.1443  $[M+H]^+$ ; found: 262.1439.

Compound **7** (68 mg, 0.26 mmol) in THF (3 mL) was added dropwise to a stirred slurry of lithium aluminumhydride (237 mg, 6.25 mmol) in THF (5.5 mL) at 0 °C. The reaction mixture was warmed to room temperature and then heated to reflux overnight. After completion of the reaction, the mixture was cooled to room temperature, water (1 mL) was added dropwise. After stirring for 10 min, aqueous sodium hydroxide (2 M, 3 mL) was added to the mixture. After stirring for another 10 min, the mixture was poured into saturated Rochelle's salt solution (30 mL). The mixture was extracted with ethyl acetate ( $4 \times 20$  mL) and dichloromethane ( $3 \times 15$  mL). The organic phases were combined, washed with 1 M NaOH and brine, dried over anhydrous sodium sulfate, filtered, and concentrated under *vacuo* to give the crude reduction product **5**. The crude product was dissolved in THF (2 mL), and triphenylphosphine (82 mg, 0.31 mmol) was added to the solution. The reaction mixture was cooled to 0 °C and DIAD (63 mg, 62  $\mu\text{L}$ , 0.31 mmol) was added dropwise. The reaction mixture was left to stir for another 10 min at 0 °C before 4-methoxyphenol (65 mg, 0.52 mmol) in THF (1 mL) was added dropwise. The mixture was stirred for another 10 min, warmed to room temperature, and then heated at 50 °C for 2 h. After this time the reaction mixture was cooled to room temperature, concentrated, and redissolved in dichloromethane. The solution was washed with aqueous NaOH (2 M), and extracted with dichloromethane ( $3 \times 15$  mL). The organic extracts were combined, dried over anhydrous sodium sulfate, filtered, and concentrated under *vacuo*. The residue was purified by column chromatography ( $\text{MeOH} / \text{CH}_2\text{Cl}_2 = 1:20$ , silica gel) to afford compound **4** (38 mg, 47% yield over two steps) as yellow oil.  $[\alpha]_D^{24.9} = +29.40$  ( $c$  0.5, MeOH).  $^1\text{H}$  NMR (400 MHz,  $\text{CDCl}_3$ ):  $\delta$  7.29–7.26 (m, 2H), 7.24–7.15 (m, 3H), 6.75 (d,  $J = 9.1$  Hz, 2H), 6.67 (d,  $J = 9.1$  Hz, 2H), 3.73 (s, 3H), 3.62 (dd,  $J = 9.4, 3.0$  Hz, 1H), 3.53–3.45 (m, 1H), 3.25 (d,  $J = 11.4$  Hz, 1H), 2.99 (d,  $J = 10.3$  Hz, 1H), 2.45 (td,  $J = 11.6, 4.3$  Hz, 1H), 2.37 (s, 3H), 2.34–2.27 (m, 1H), 2.12–2.00 (m, 2H), 1.94 (dd,  $J = 12.4, 3.8$  Hz, 1H), 1.86 (d,  $J = 3.6$  Hz, 1H).  $^{13}\text{C}$  NMR (101 MHz,  $\text{CDCl}_3$ ):  $\delta$  153.8, 153.2, 144.1, 128.7, 127.6, 126.7, 115.5, 114.6, 69.6, 59.8, 56.4, 55.8, 46.6, 44.4, 42.0, 34.4. HRMS (ESI):  $m/z$  calcd for  $\text{C}_{20}\text{H}_{26}\text{NO}_2^+$ : 312.1964  $[M+H]^+$ ; found: 312.1958.

#### IV. References

- [1] E. Zandvoort, B. J. Baas, W. J. Quax, G. J. Poelarends, *ChemBioChem* **2011**, *12*, 602–609.
- [2] (a) S. L. Stamps, M. C. Fitzgerald, C. P. Whitman, *Biochemistry* **1998**, *37*, 10195–10202; (b) J. B. Lubetsky, M. Swope, C. Dealwis, P. Blake, E. Lolis, *Biochemistry* **1999**, *38*, 7346–7354.
- [3] G. Odh, A. Hindemith, A. M. Rosengren, E. Rosengren, H. Rorsman, *Biochem. Biophys. Res. Co.* **1993**, *197*, 619–624.
- [4] (a) A. GARRIDO-PERTIERRA, R. A. COOPER, *Eur. J. Biochem.* **1981**, *117*, 581–584; (b) H. S. Subramanya, D. I. Roper, Z. Dauter, E. J. Dodson, G. J. Davies, K. S. Wilson, D. B. Wigley, *Biochemistry*

- 1996**, *35*, 792–802.
- [5] G. A. Aleku, S. P. France, H. Man, J. Mangas-Sanchez, S. L. Montgomery, M. Sharma, F. Leipold, S. Hussain, G. Grogan, N. J. Turner, *Nat. Chem.* **2017**, *9*, 961–969.
- [6] J. R. Marshall, P. Yao, S. L. Montgomery, J. D. Finnigan, T. W. Thorpe, R. B. Palmer, J. Mangas-Sanchez, R. A. M. Duncan, R. S. Heath, K. M. Graham, D. J. Cook, S. J. Charnock, N. J. Turner, *Nat. Chem.* **2021**, *13*, 140–148.
- [7] C. Guo, M. Saifuddin, T. Saravanan, M. Sharifi, G. J. Poelarends, *ACS Catal.* **2019**, *9*, 4369–4373.
- [8] Y. Wang, P. Li, X. Liang, J. Ye, *Adv. Synth. Catal.* **2008**, *350*, 1383–1389.
- [9] S. Brandau, A. Landa, J. Franzén, M. Marigo, K. A. Jørgensen, *Angew. Chem., Int. Ed.* **2006**, *45*, 4305–4309.
- [10] G.-L. Zhao, W.-W. Liao, A. Córdova, *Tetrahedron Lett.* **2006**, *47*, 4929–4932.
- [11] L. Scott, Y. Nakano, C. Zhang, D. W. Lupton, *Angew. Chem., Int. Ed.* **2018**, *57*, 10299–10303.

## V. NMR spectra

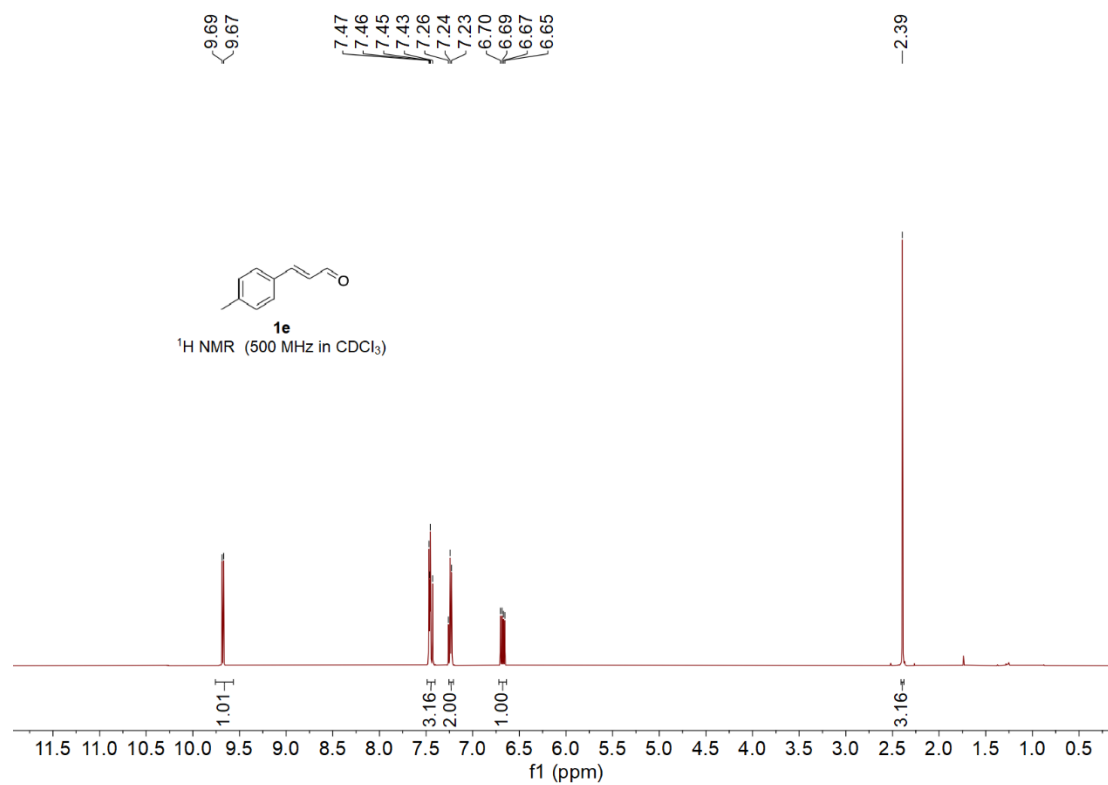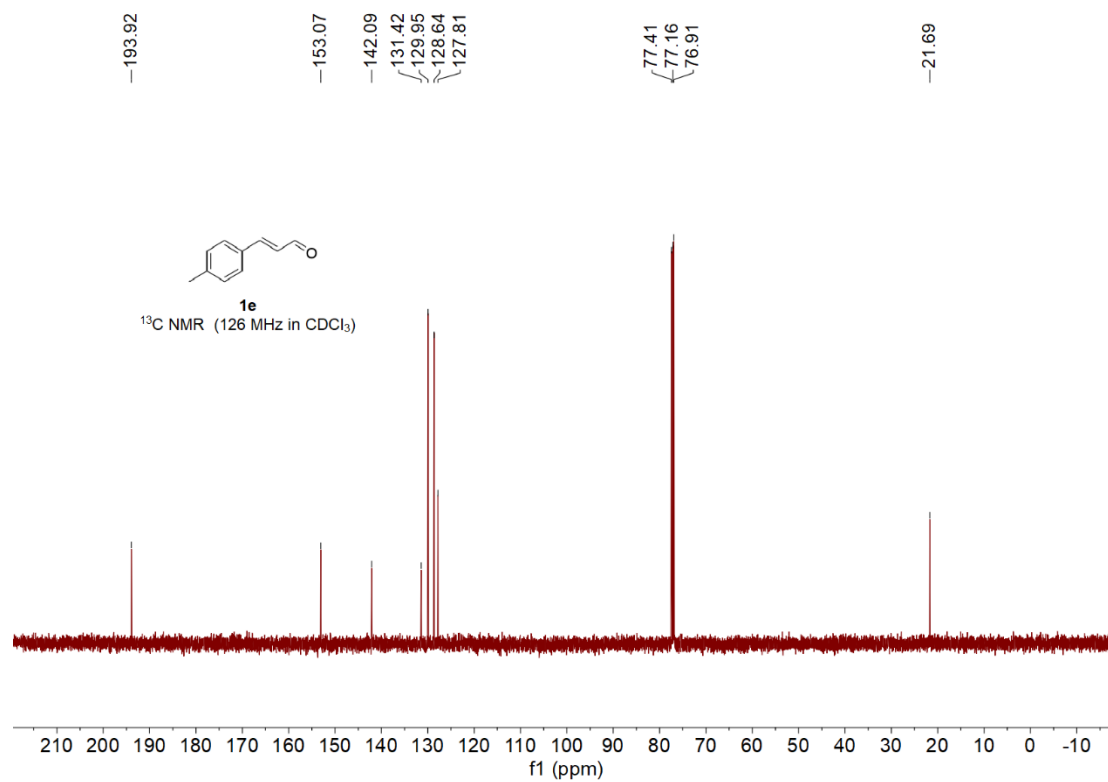

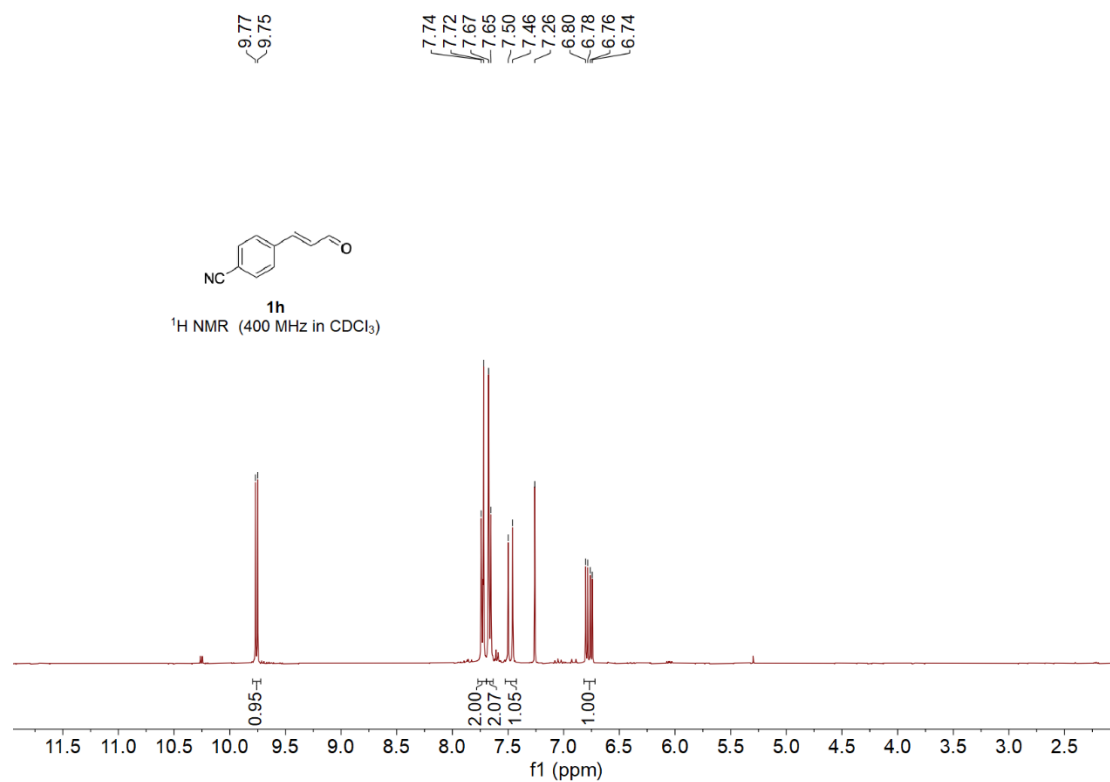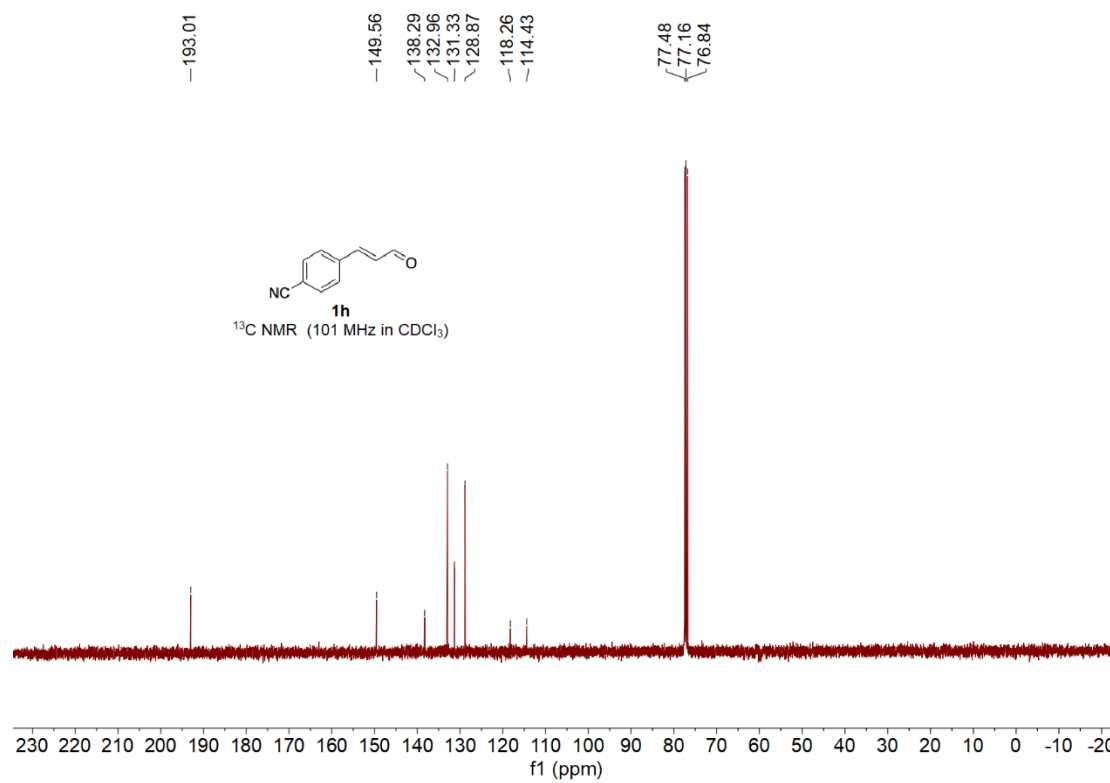

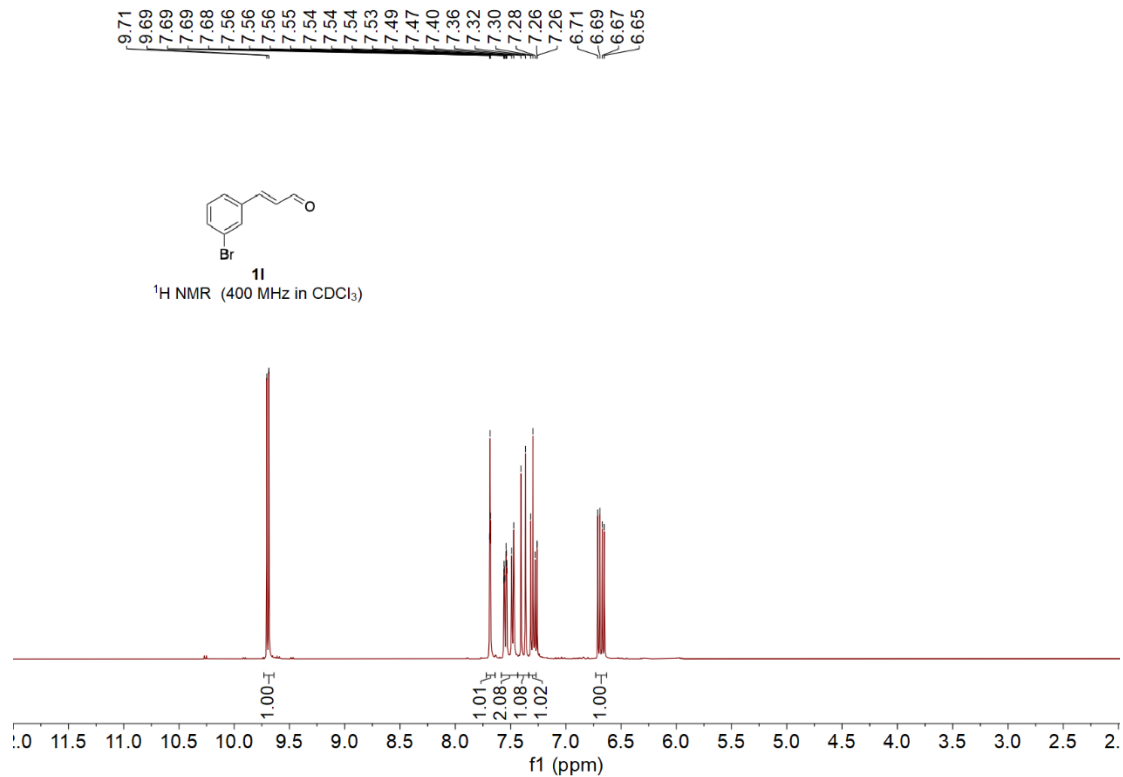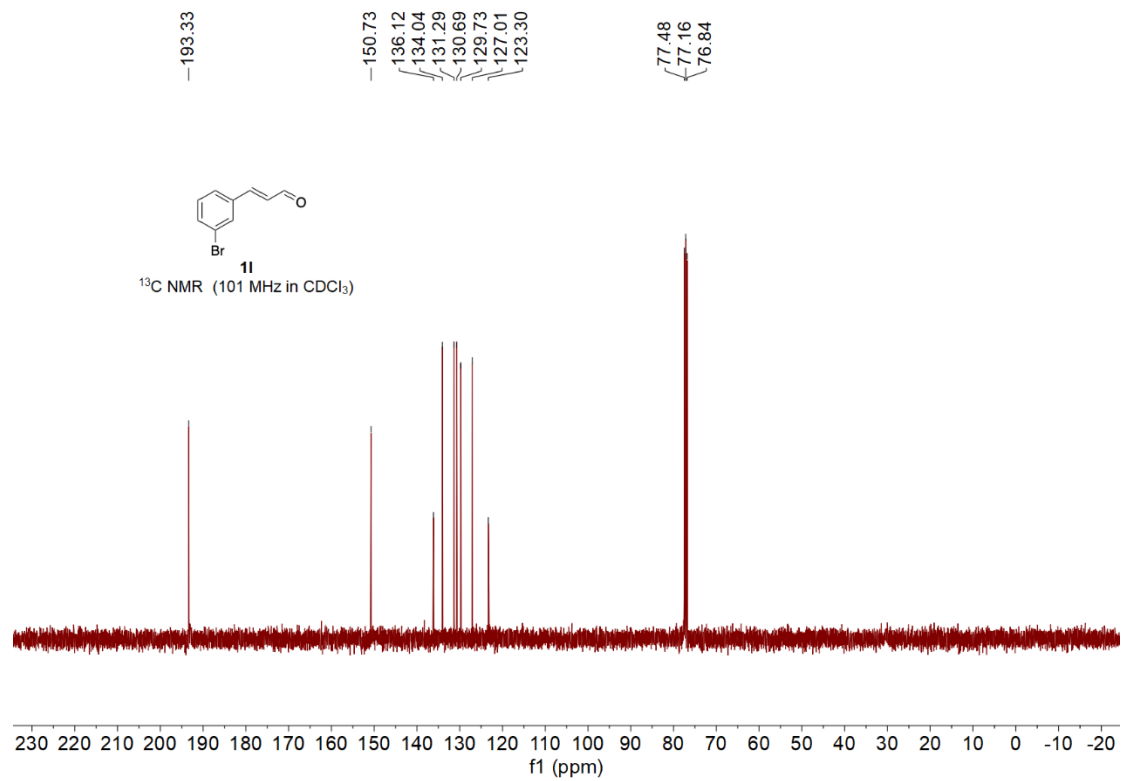

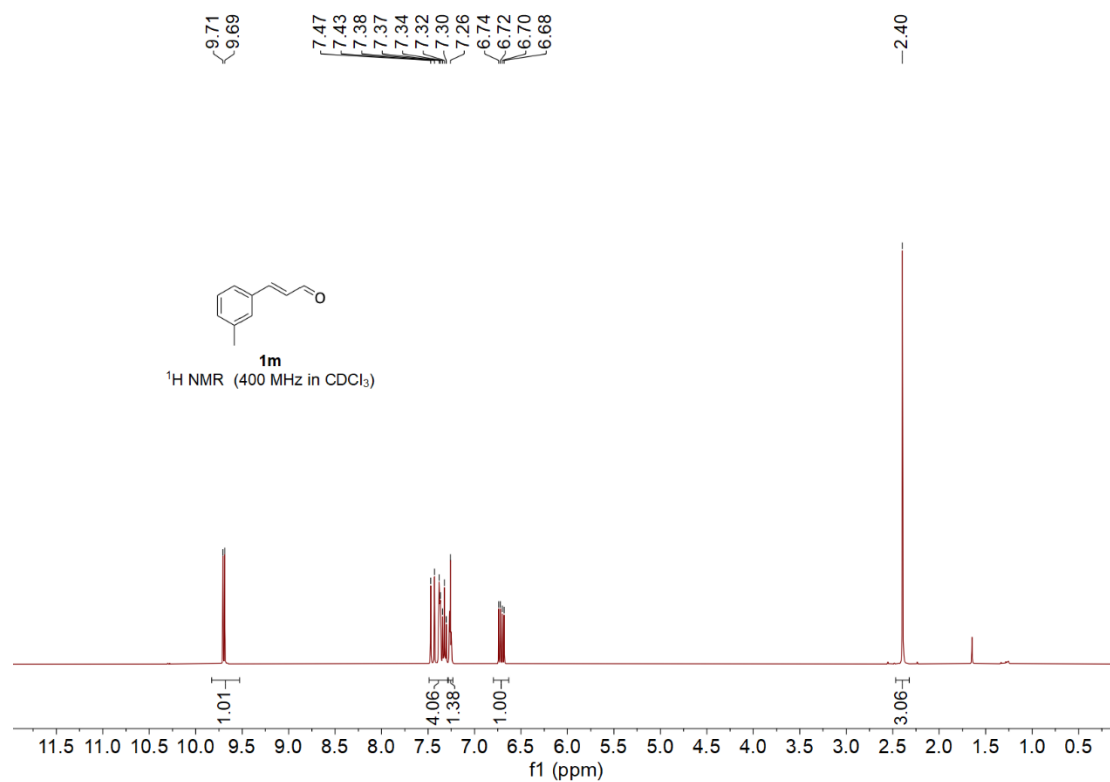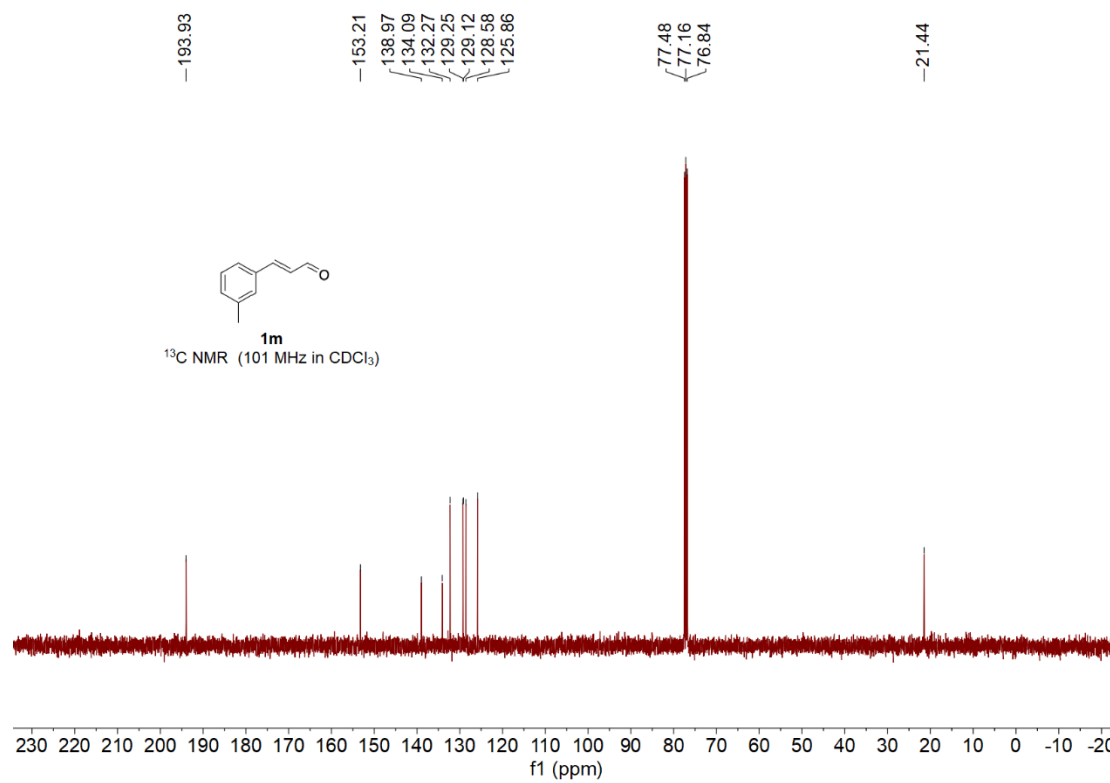

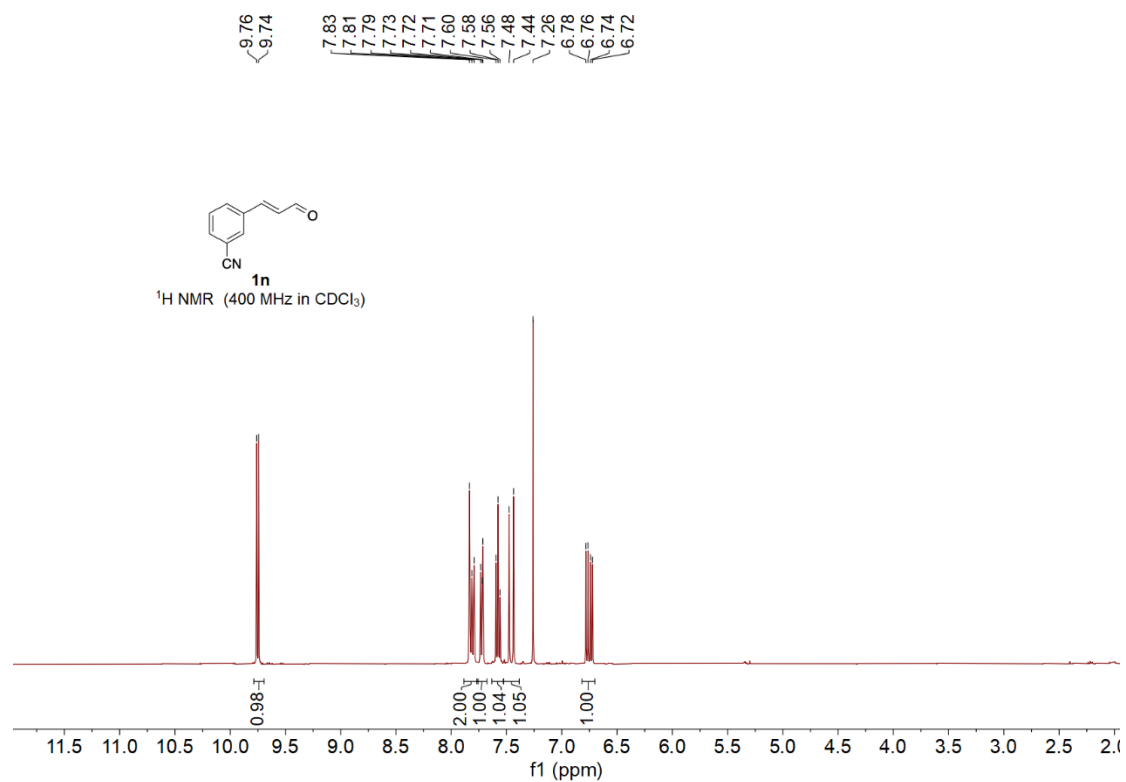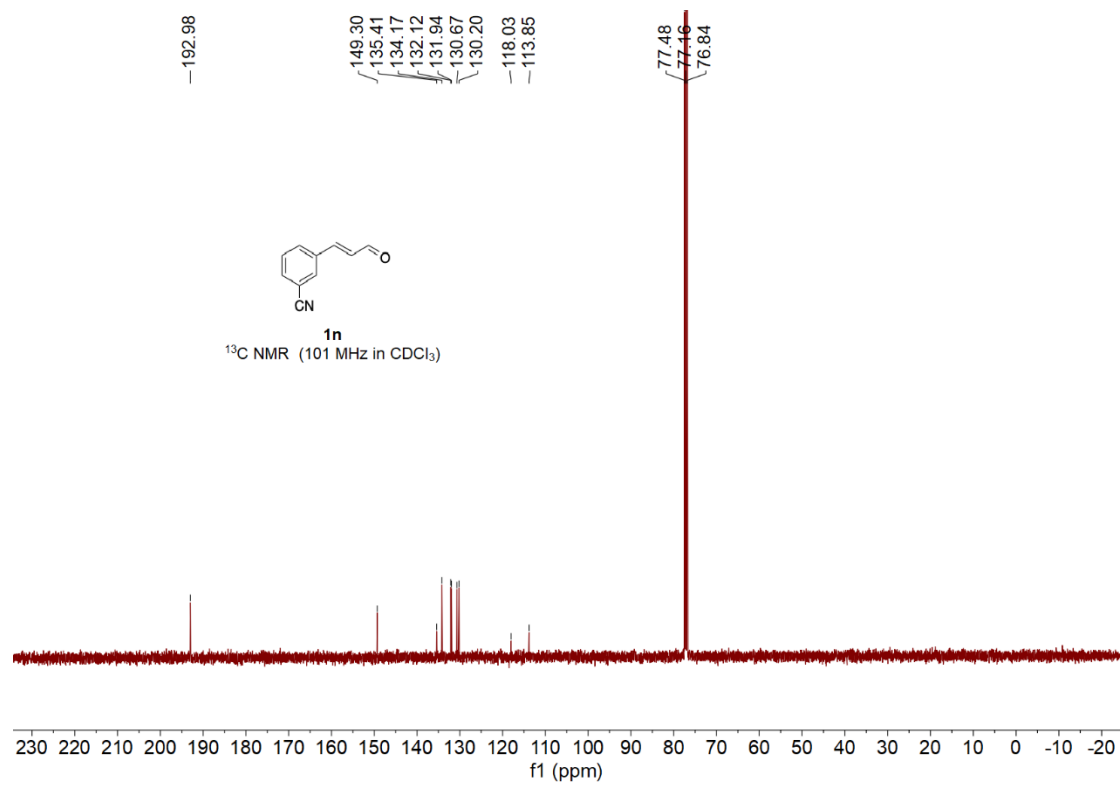

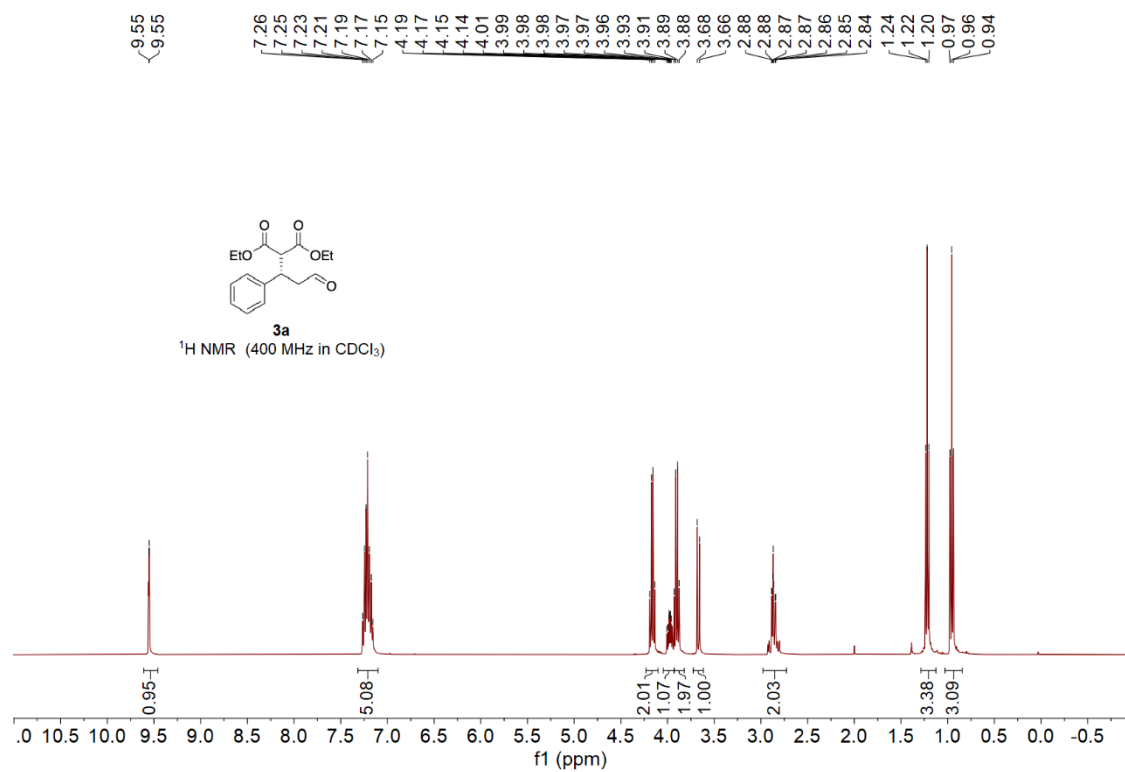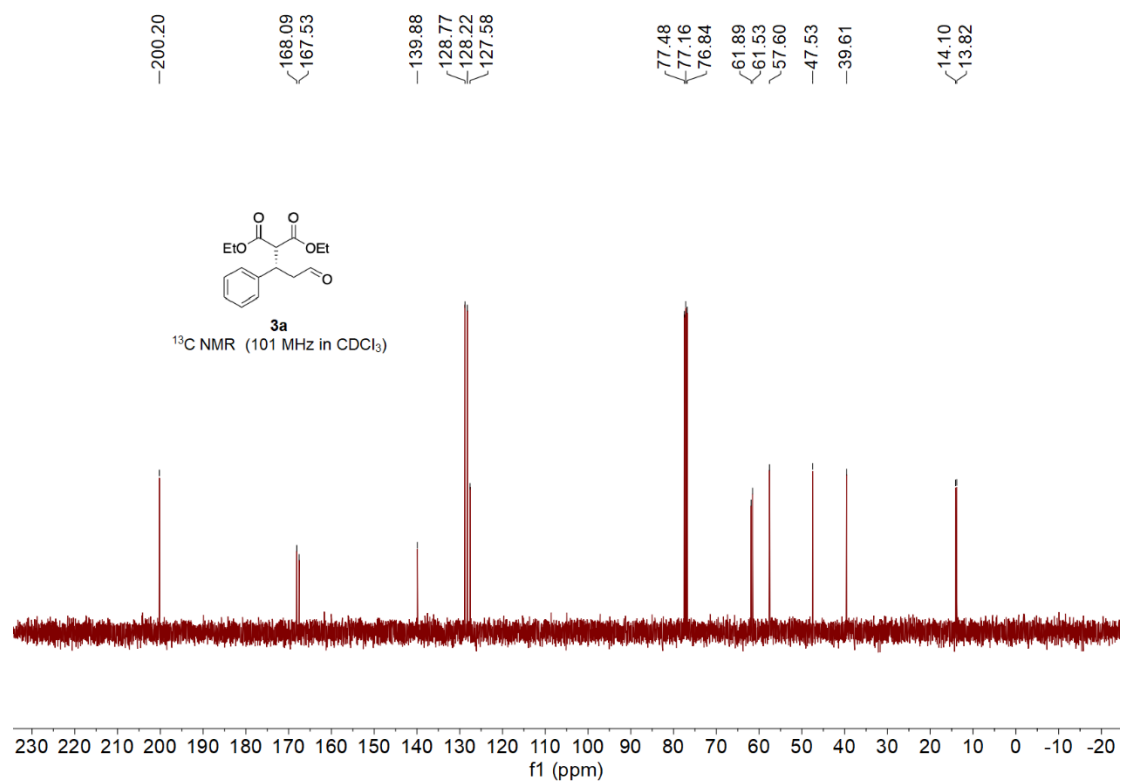



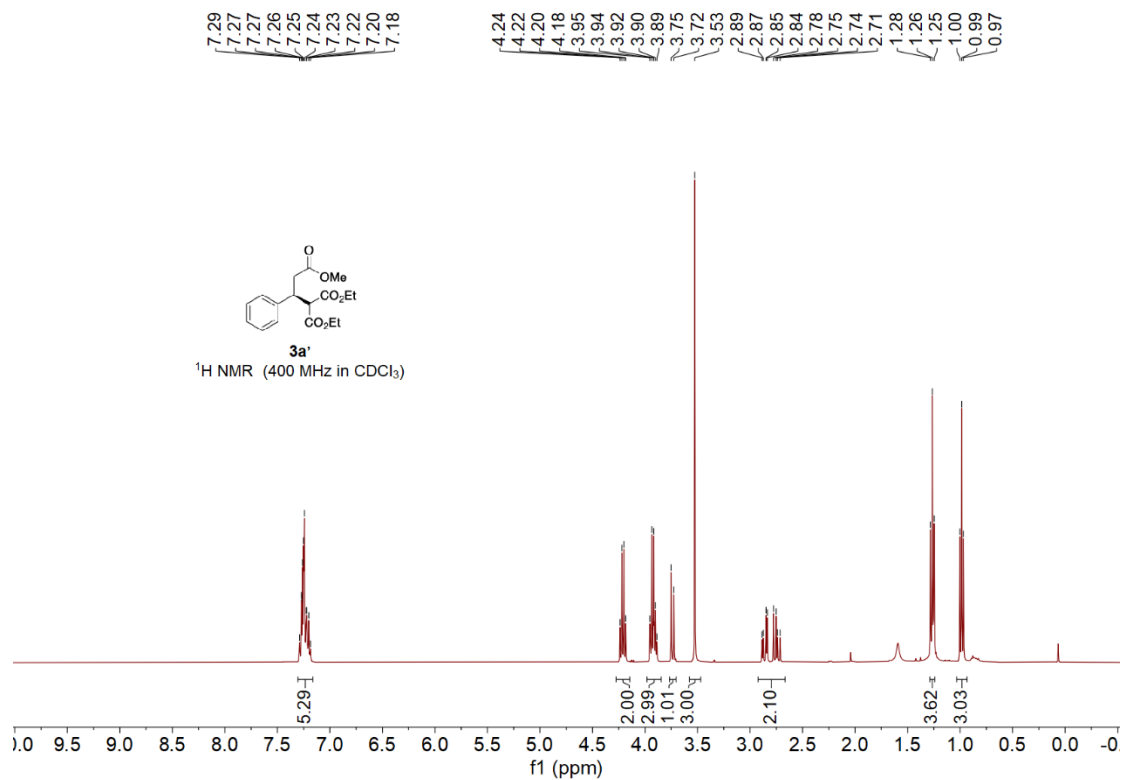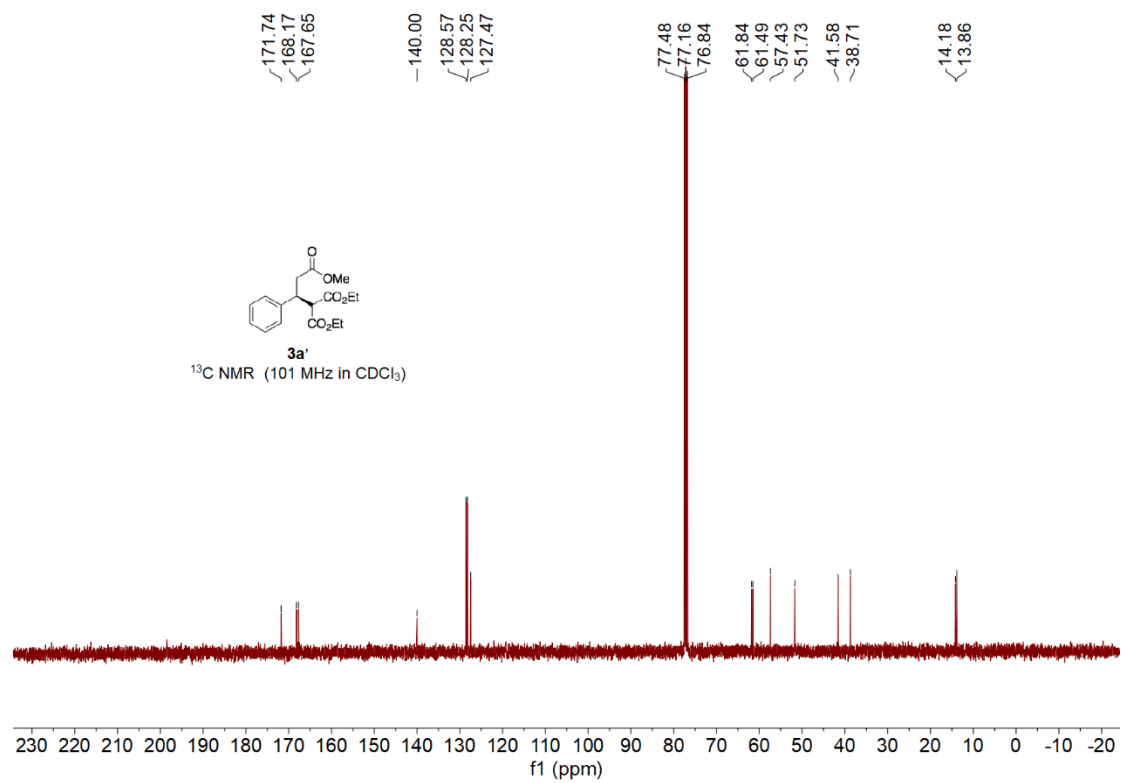

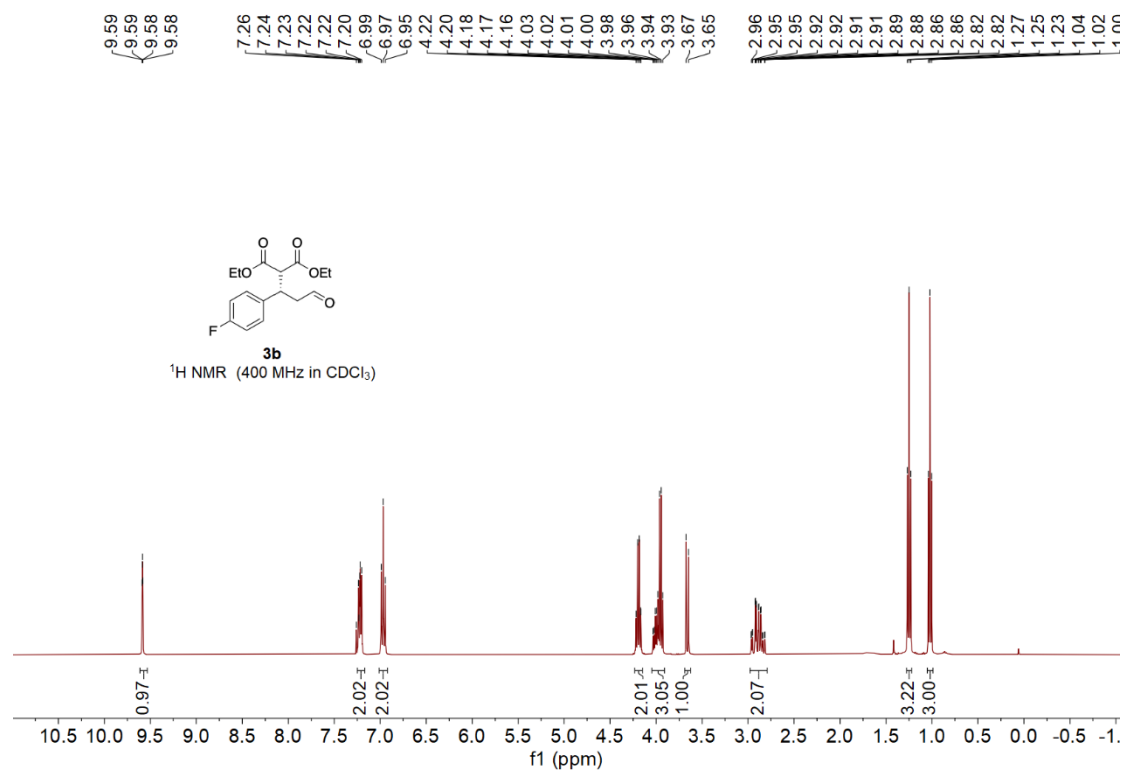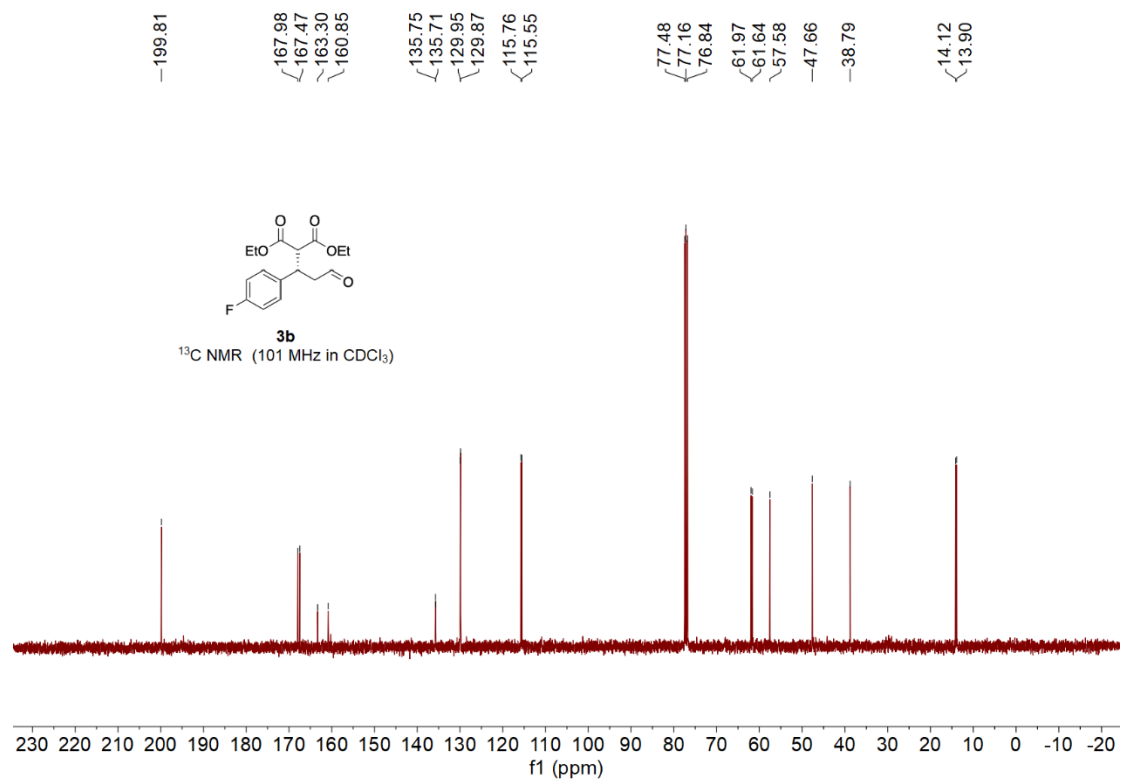

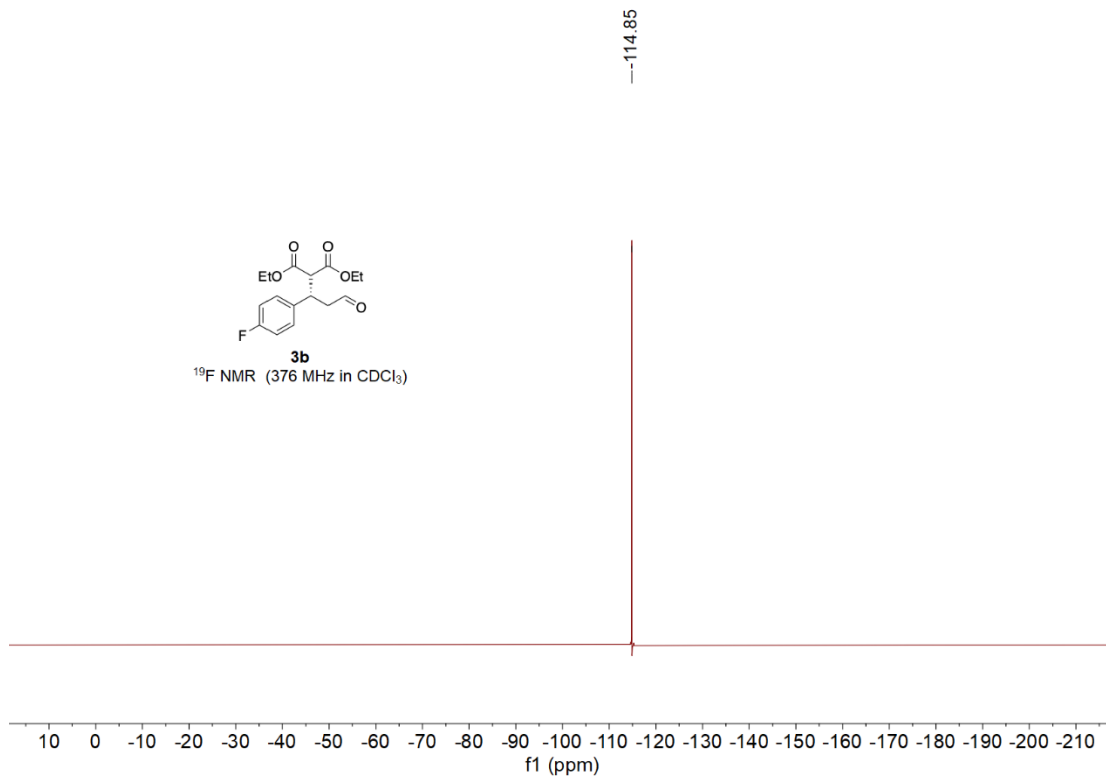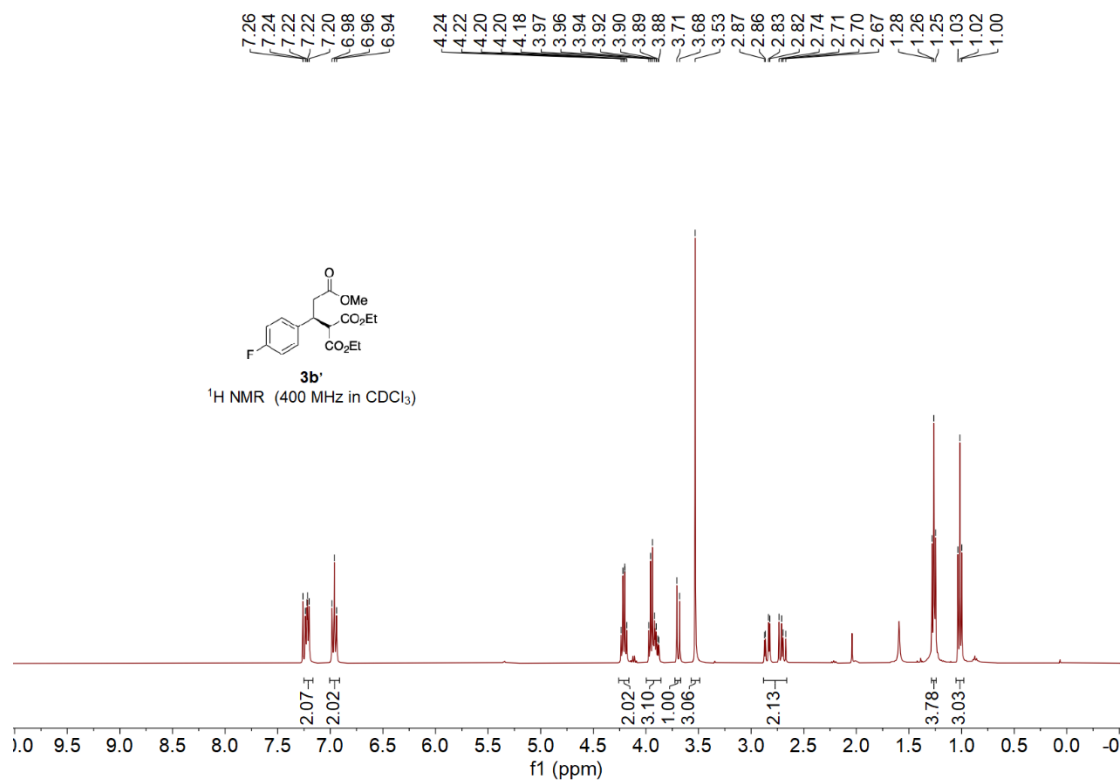

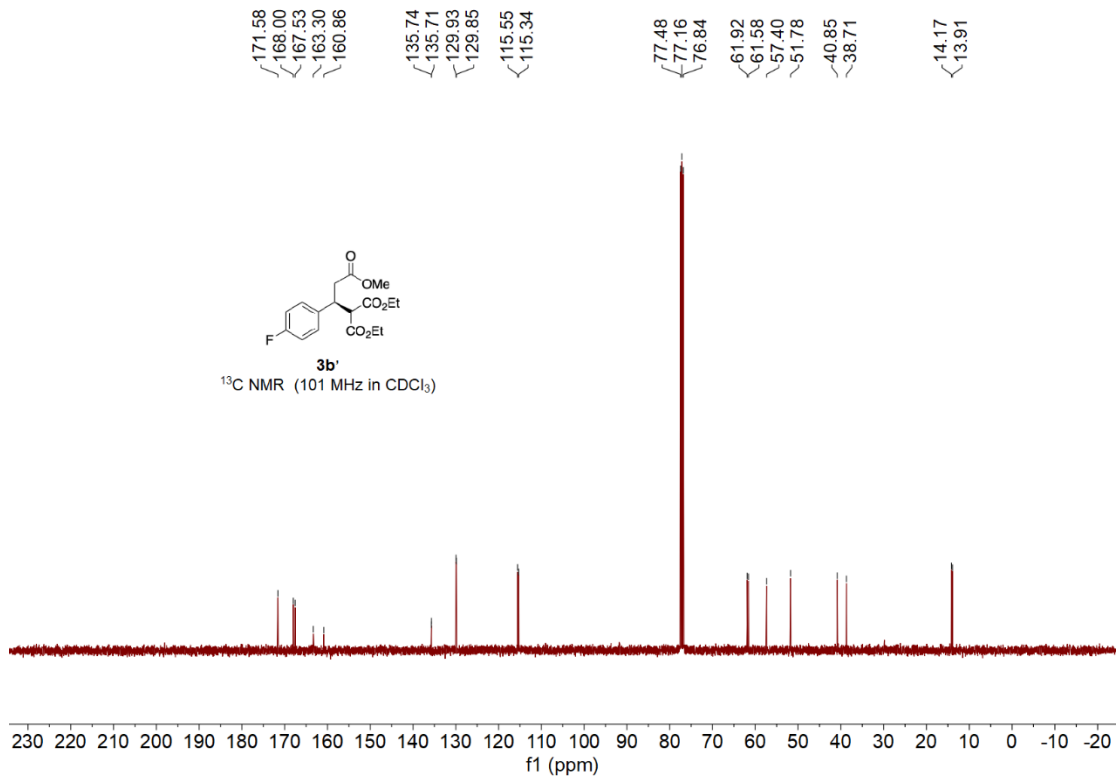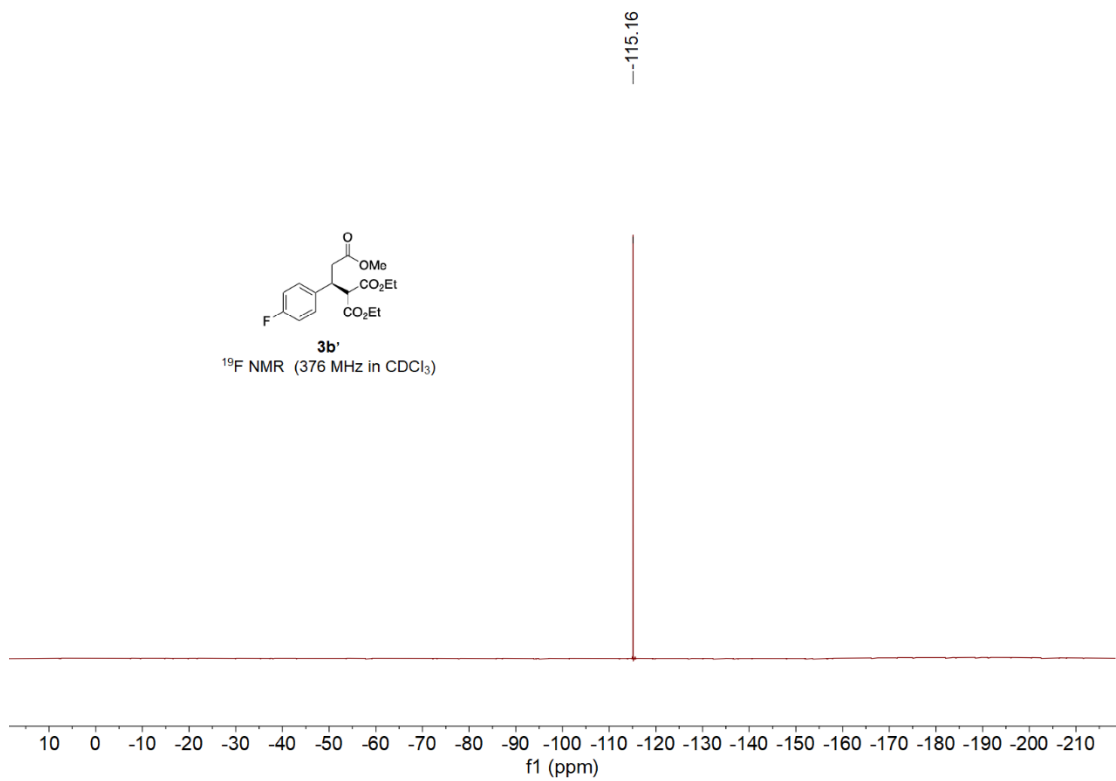

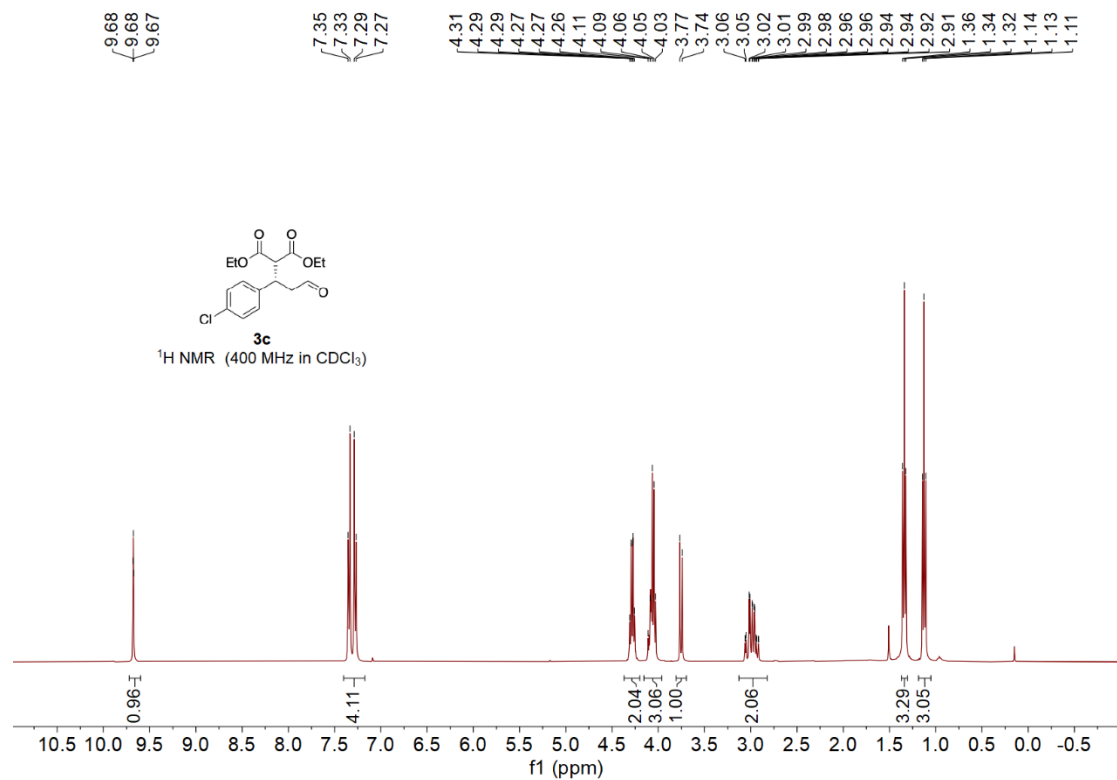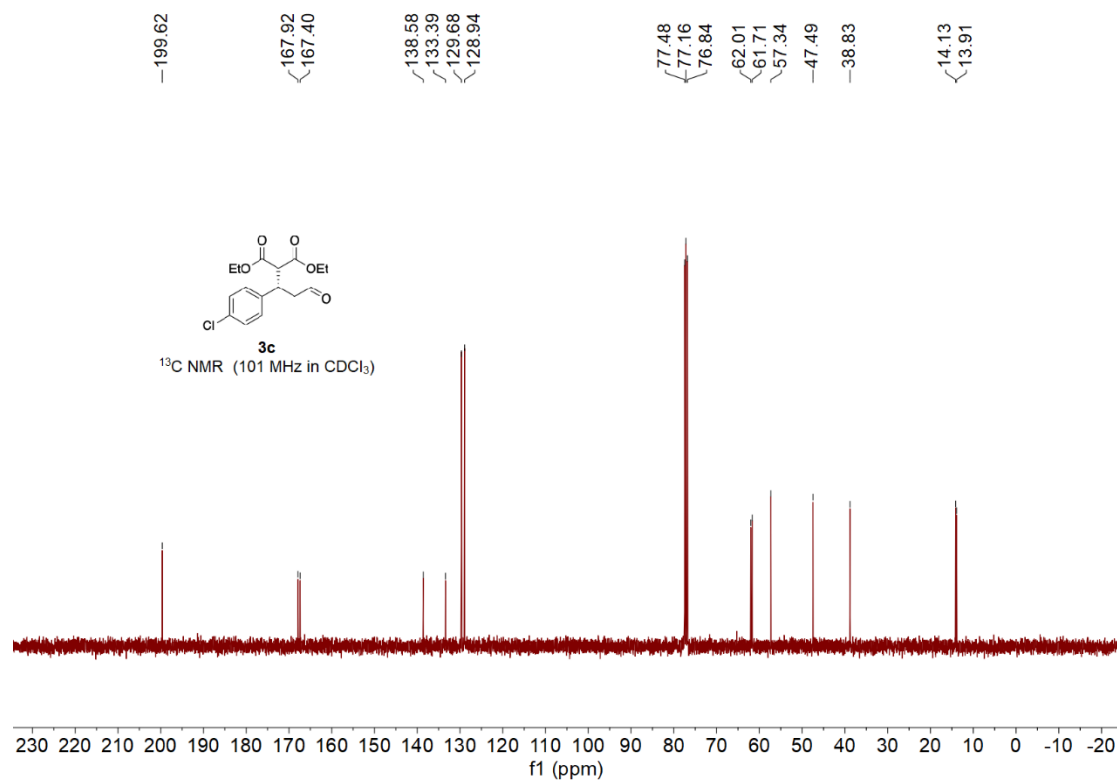

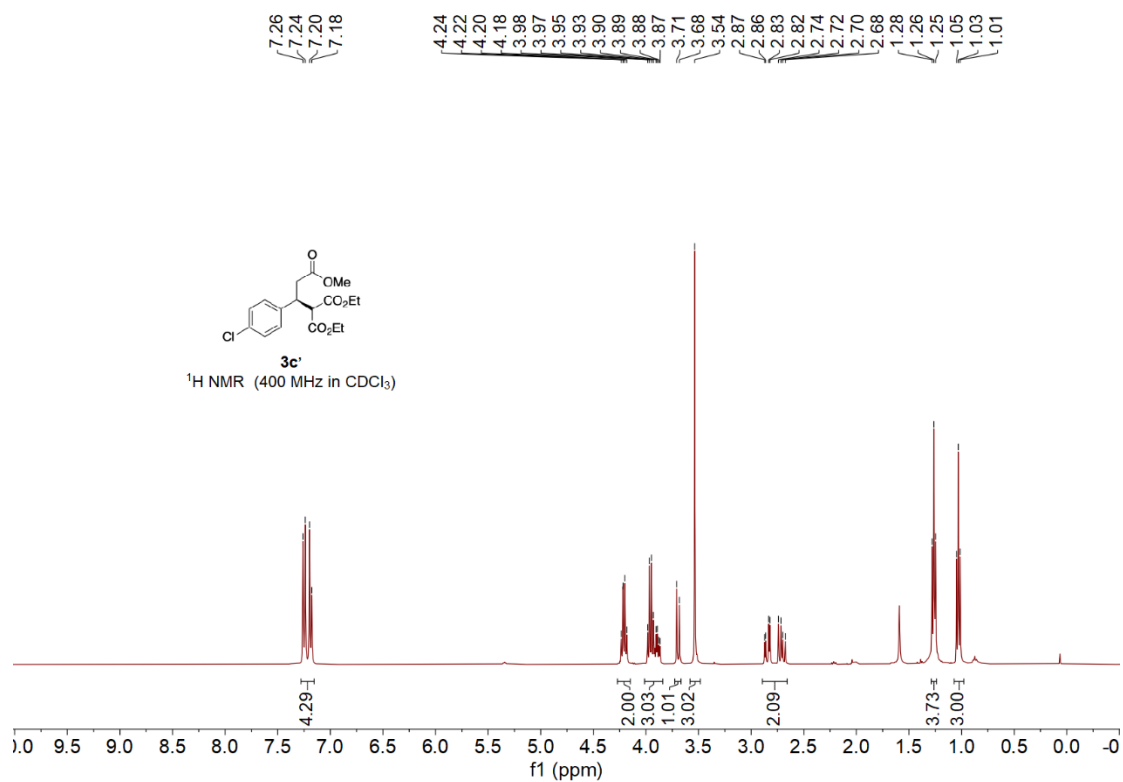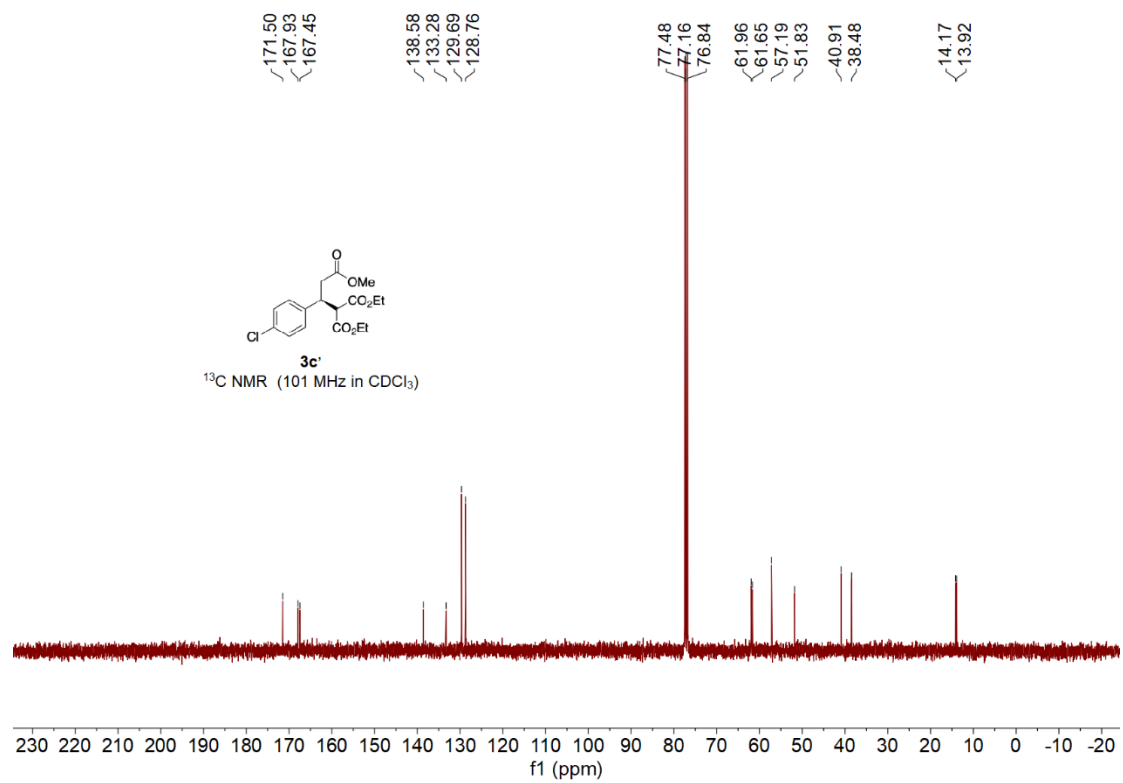

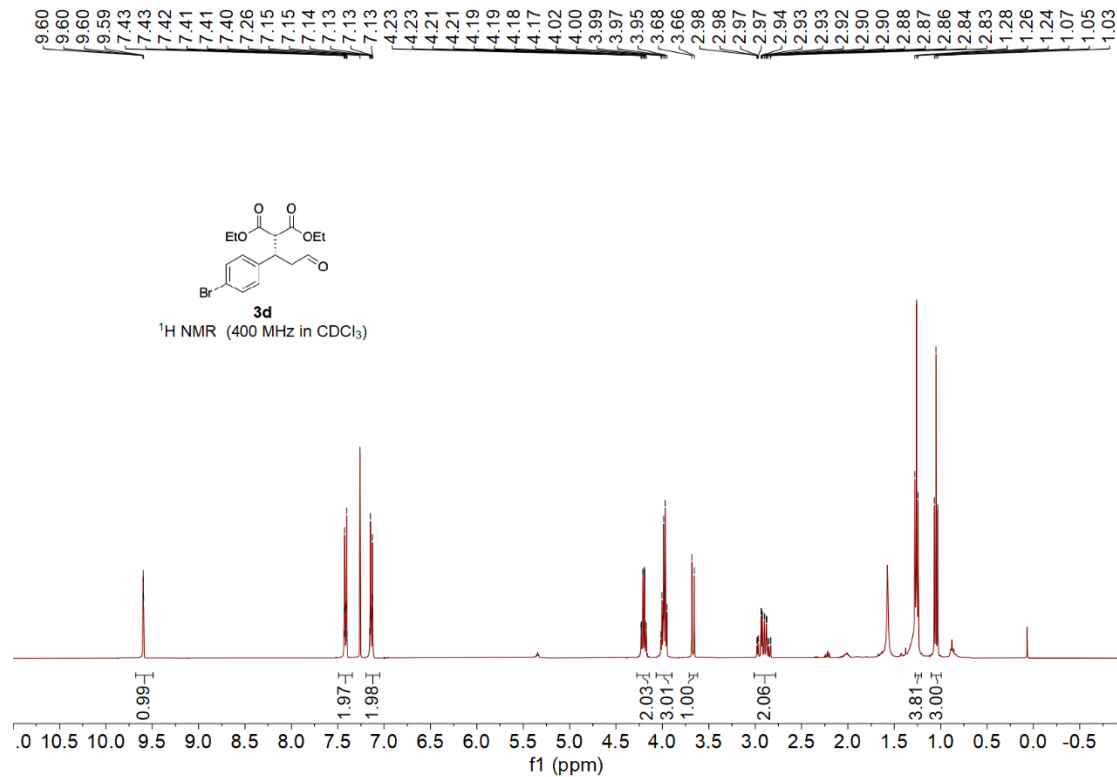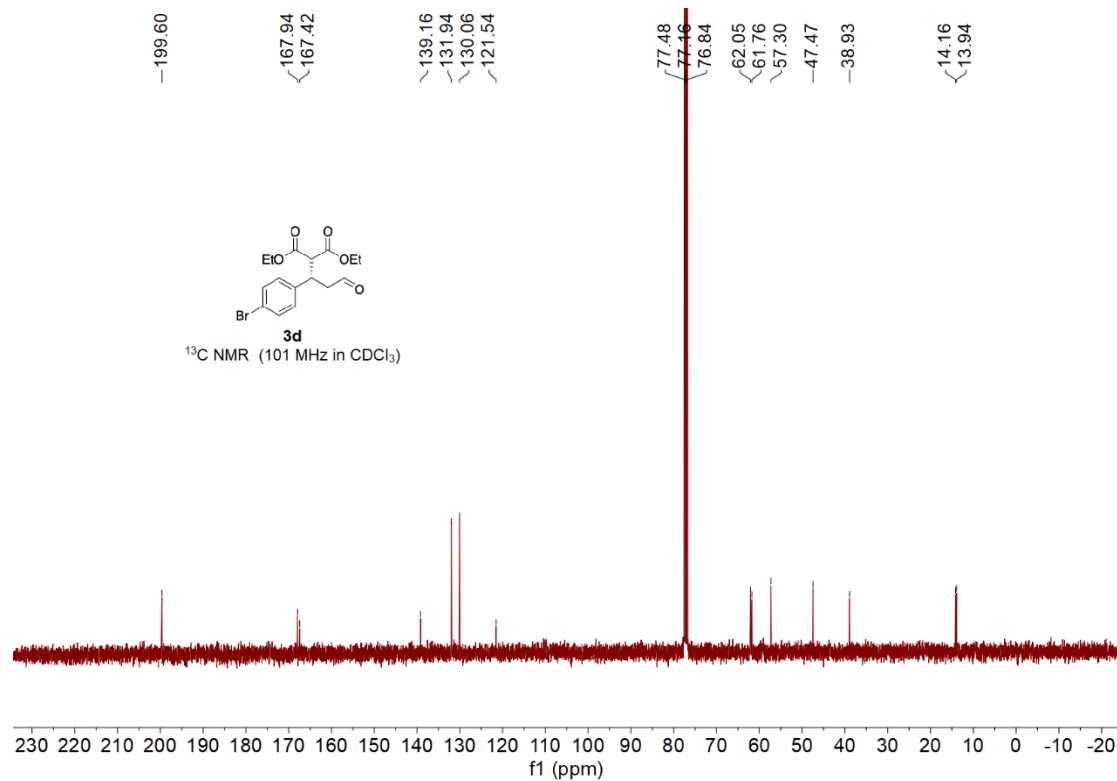

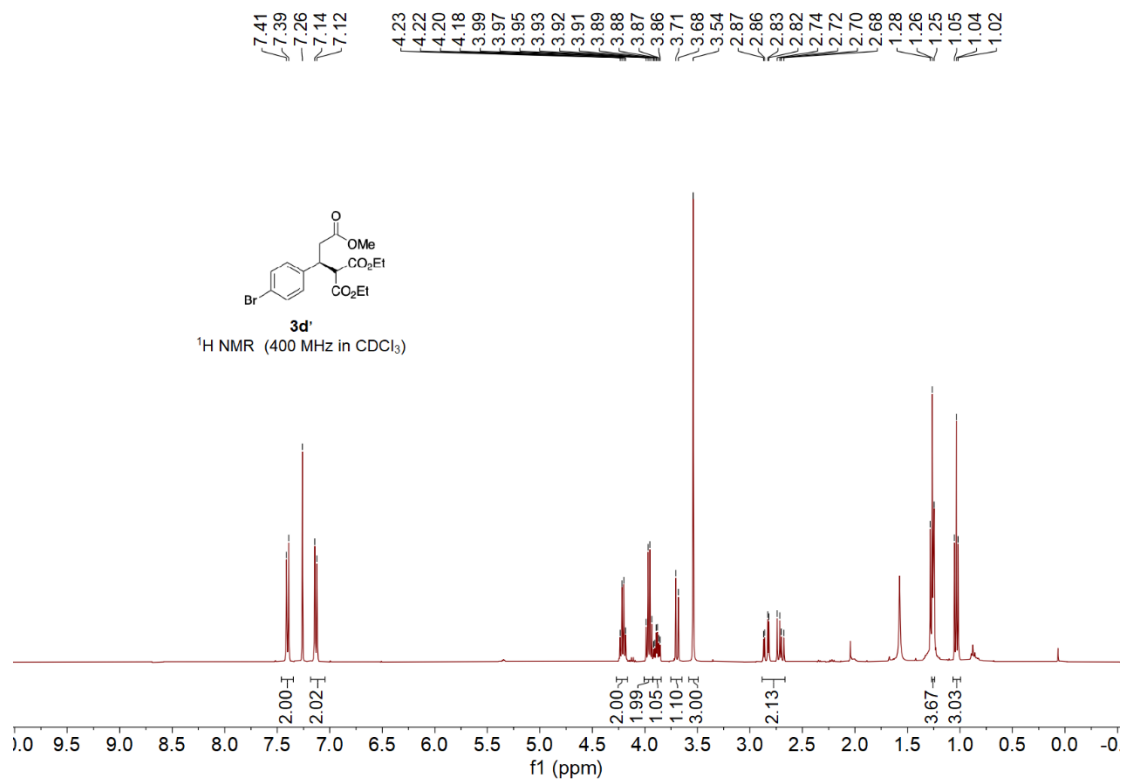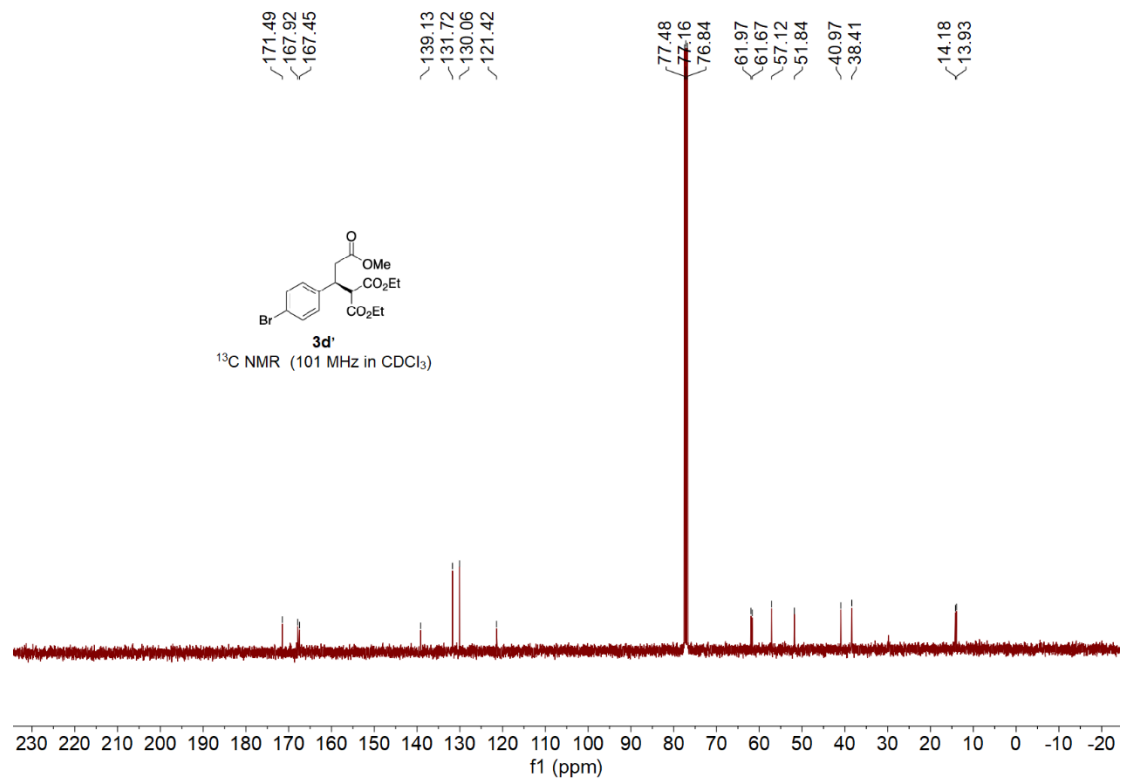



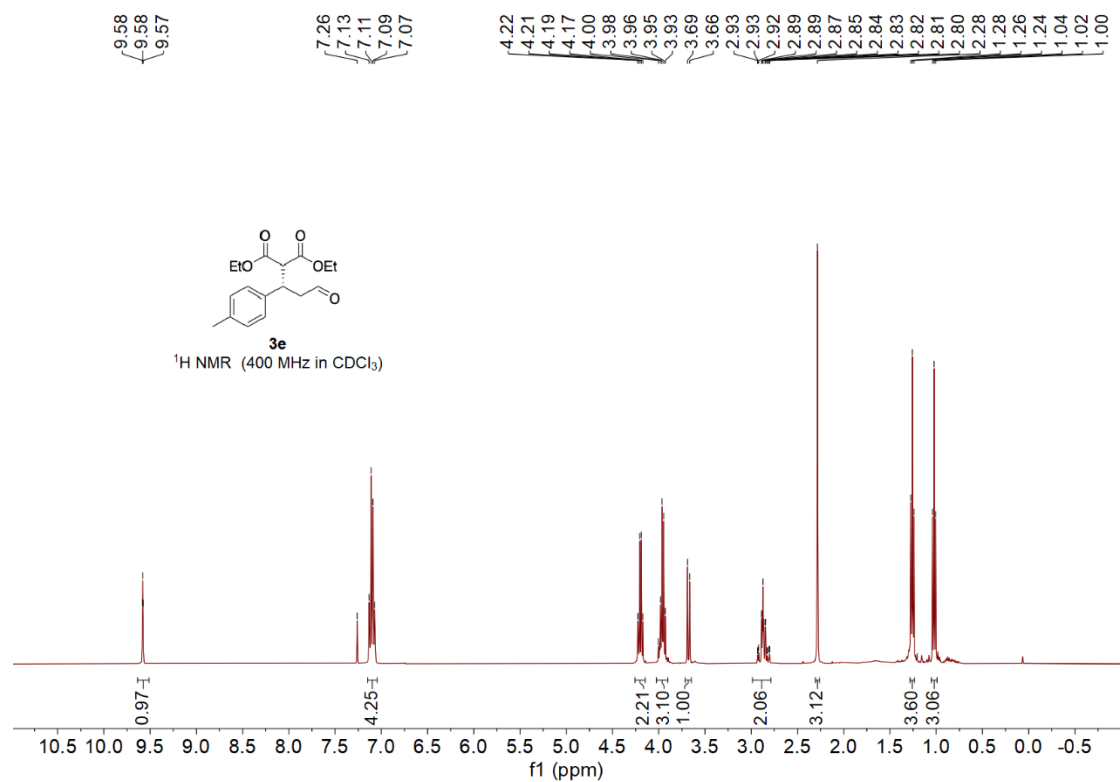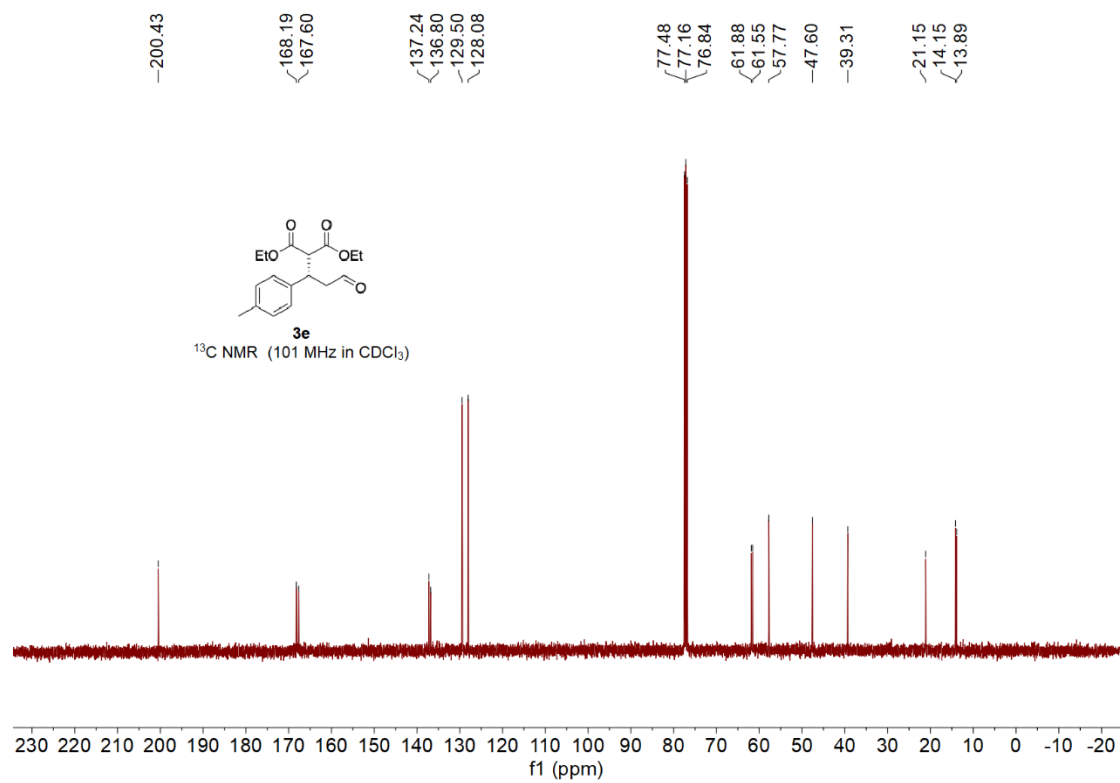

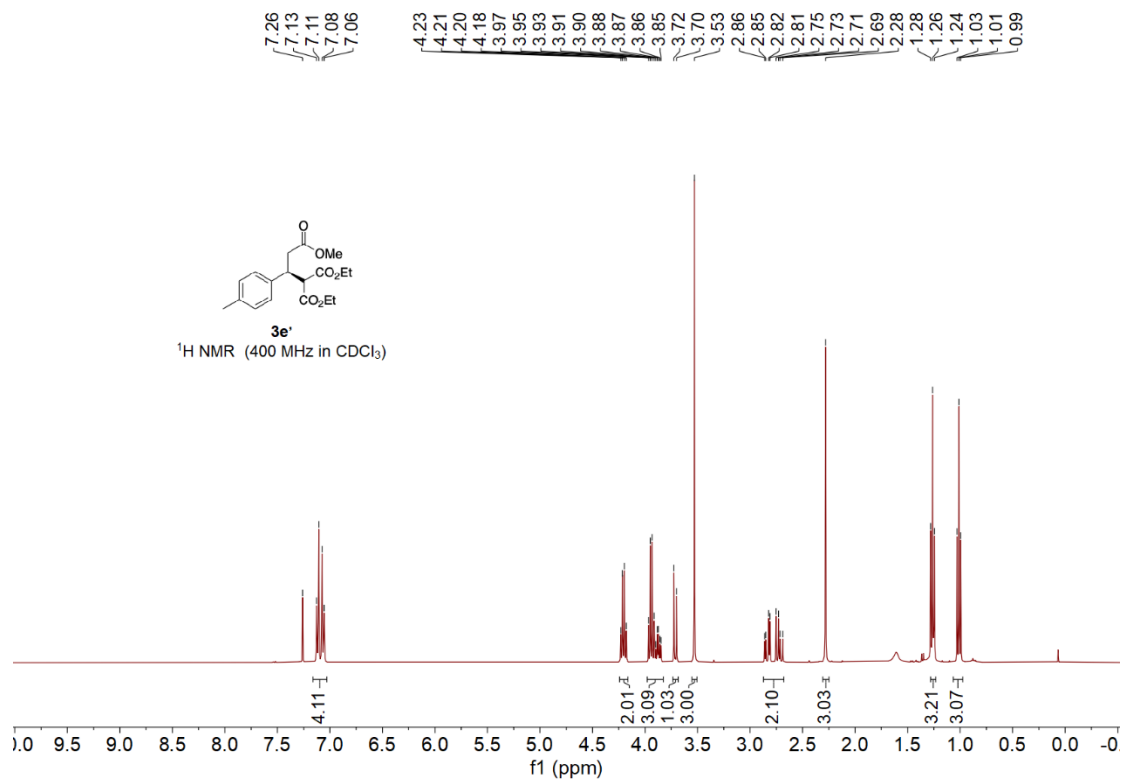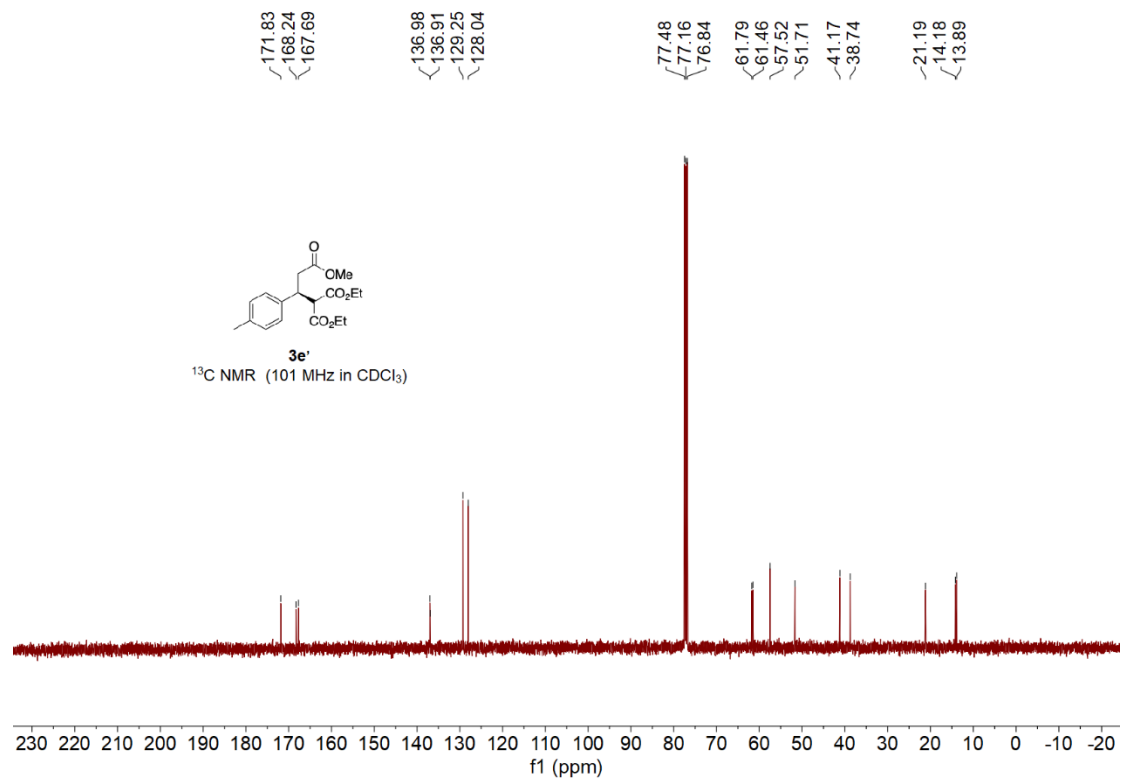

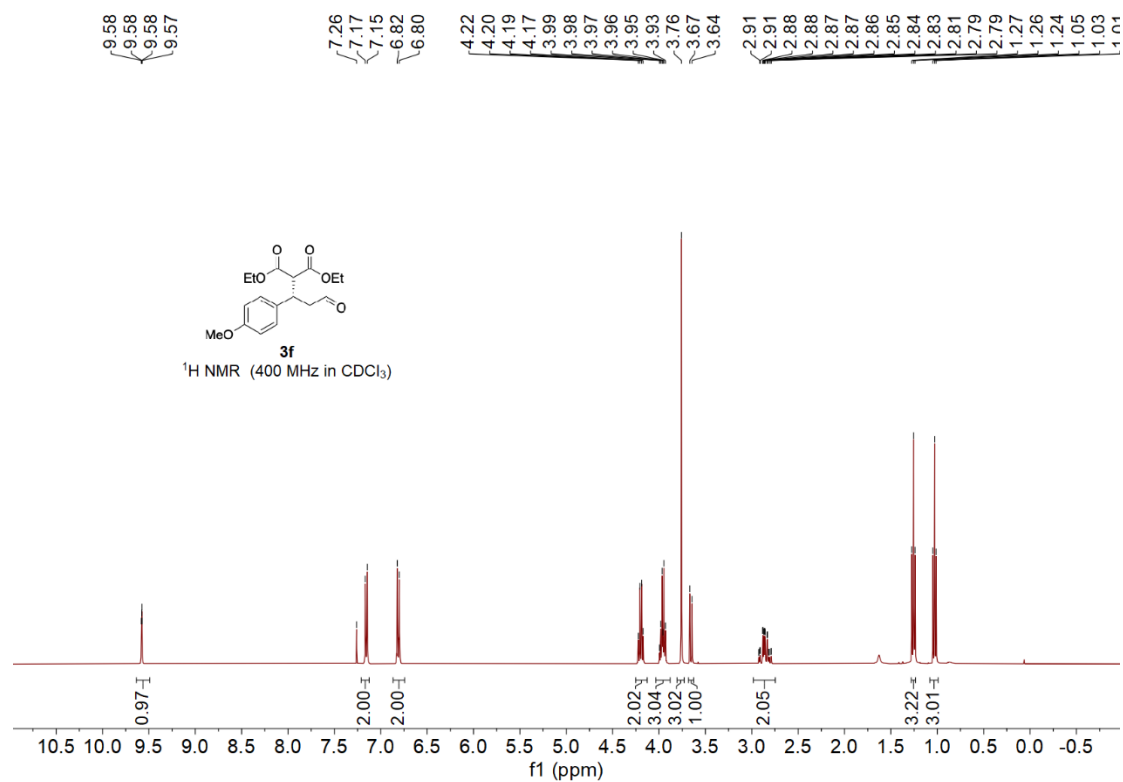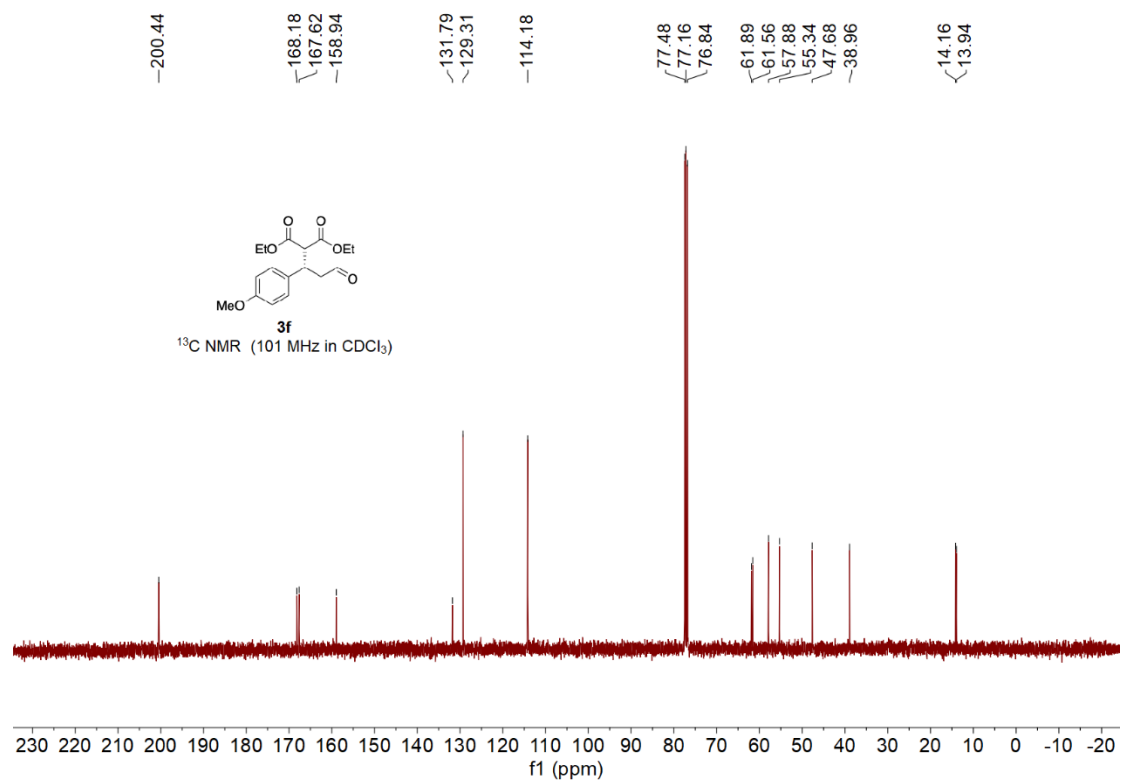

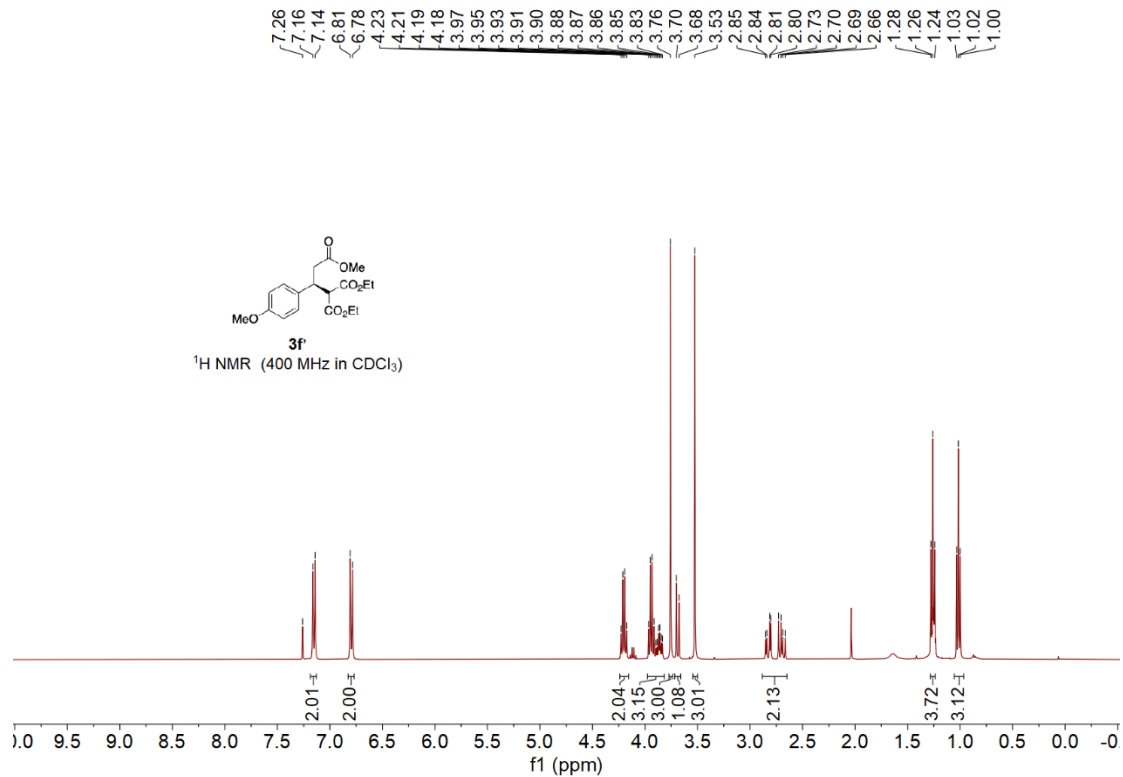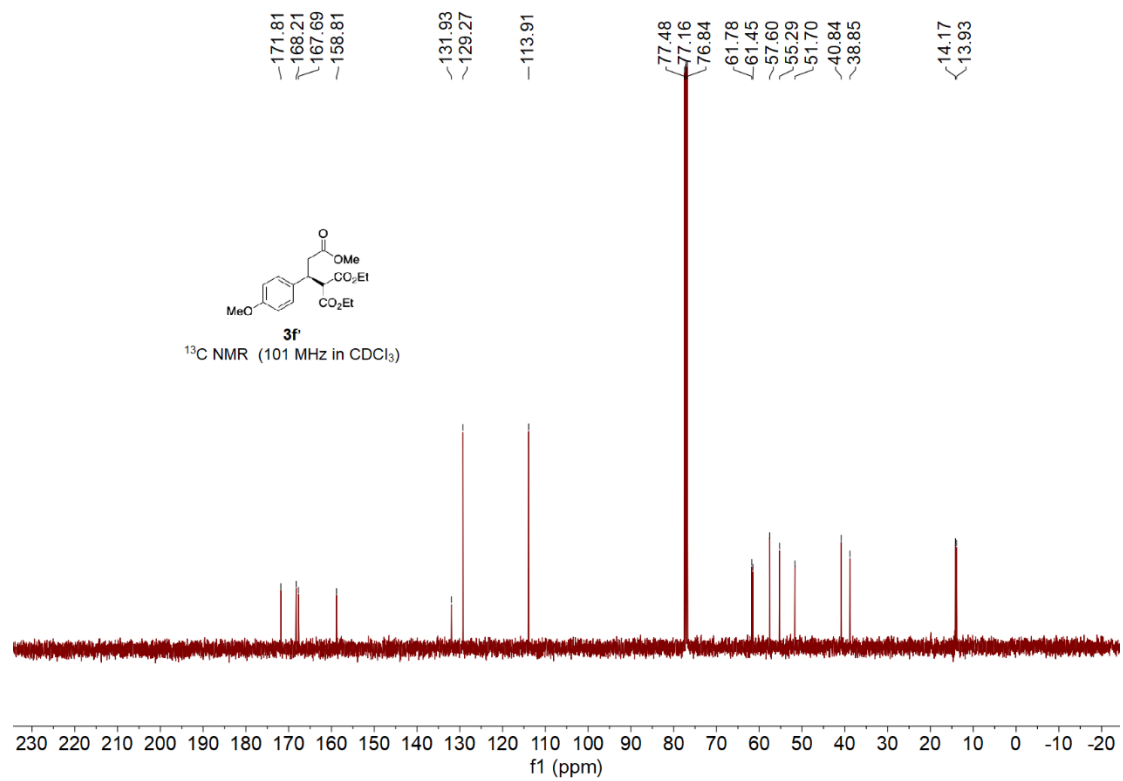

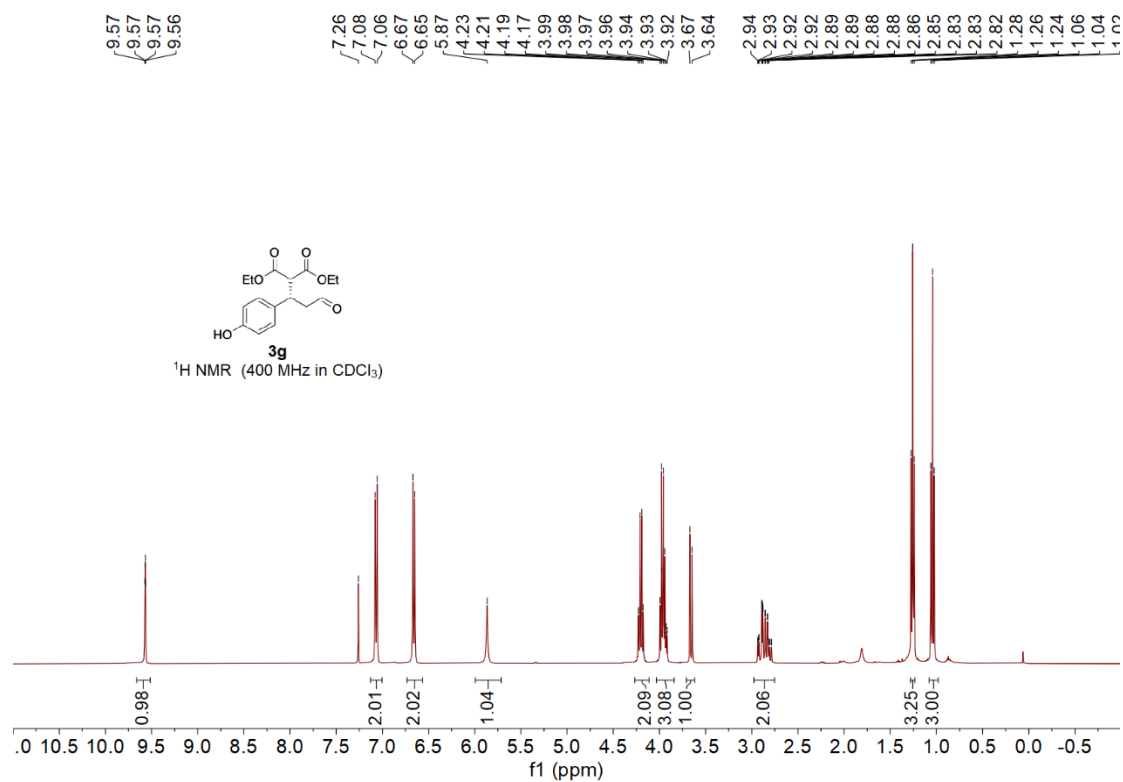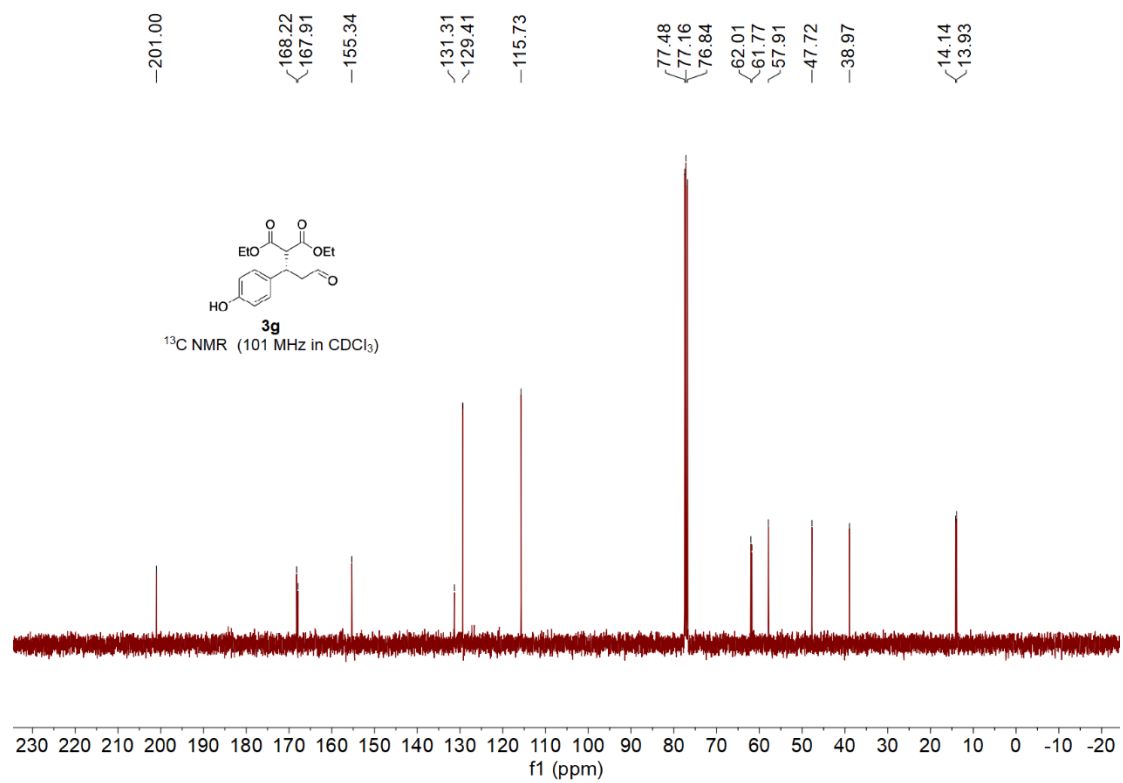

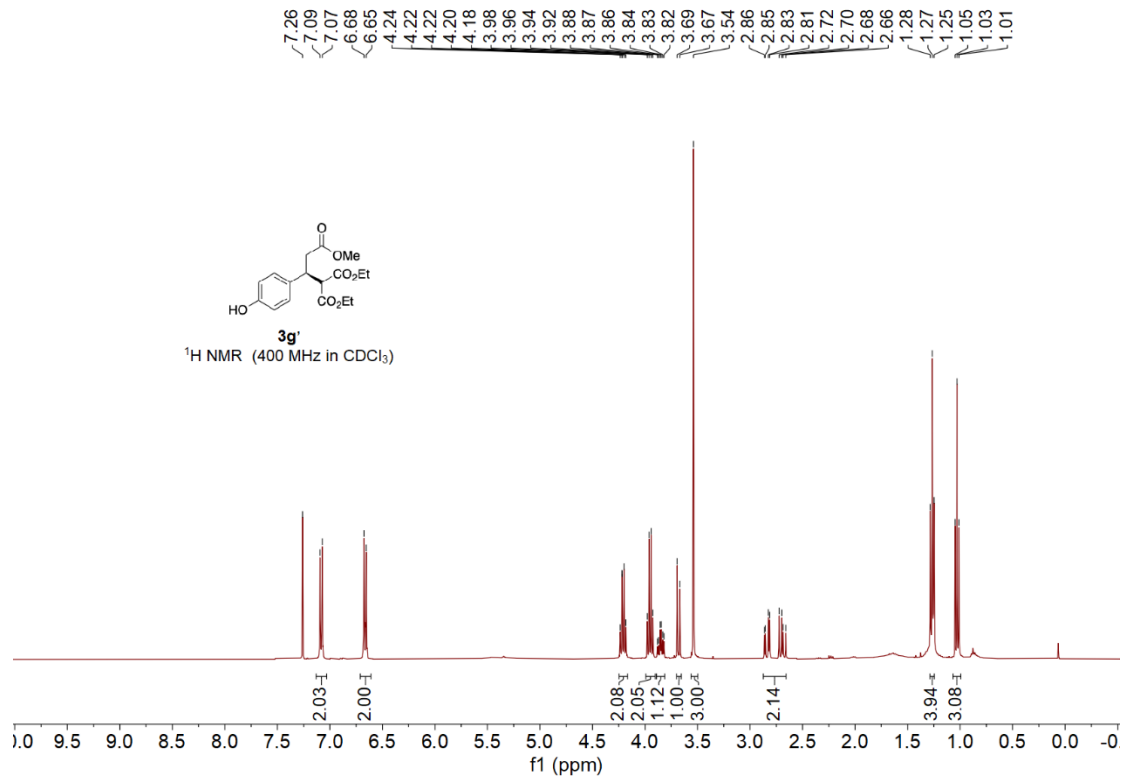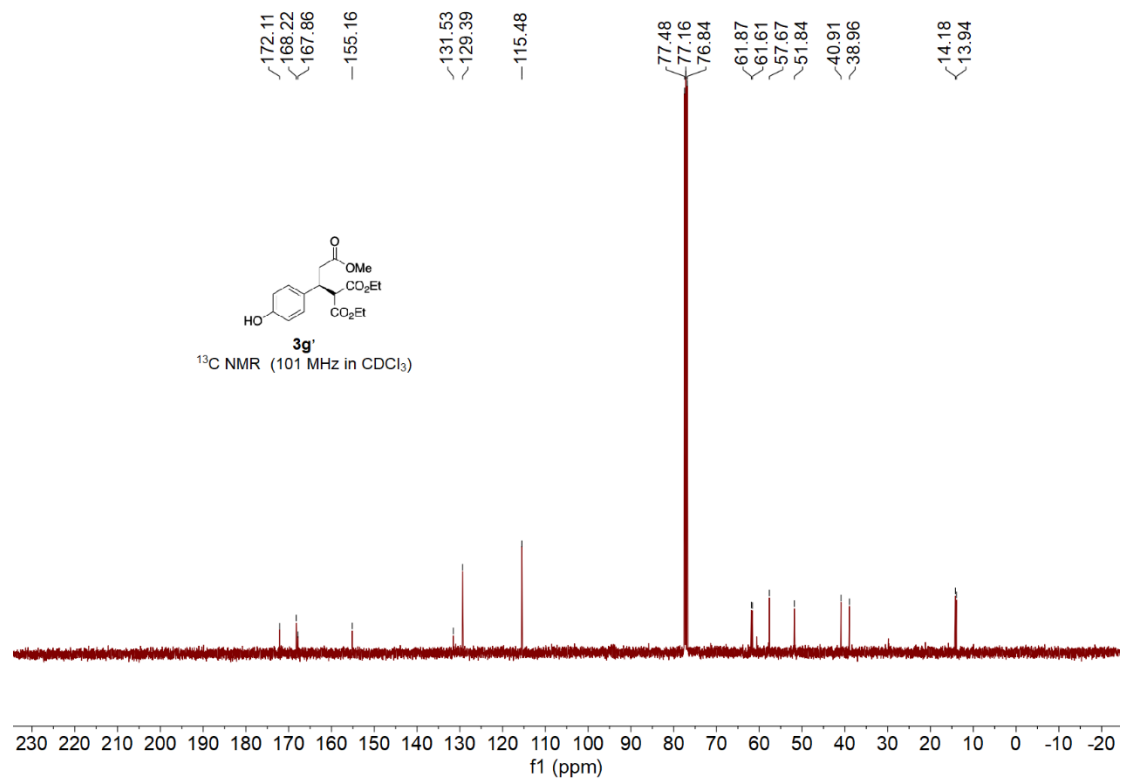

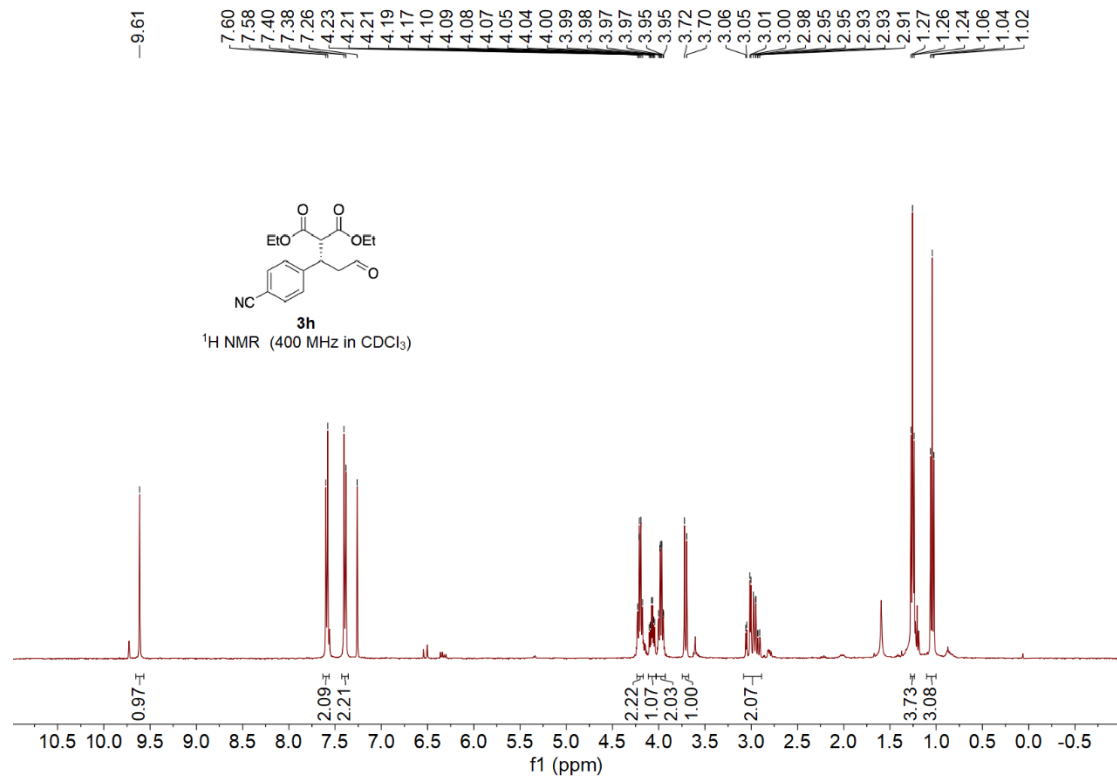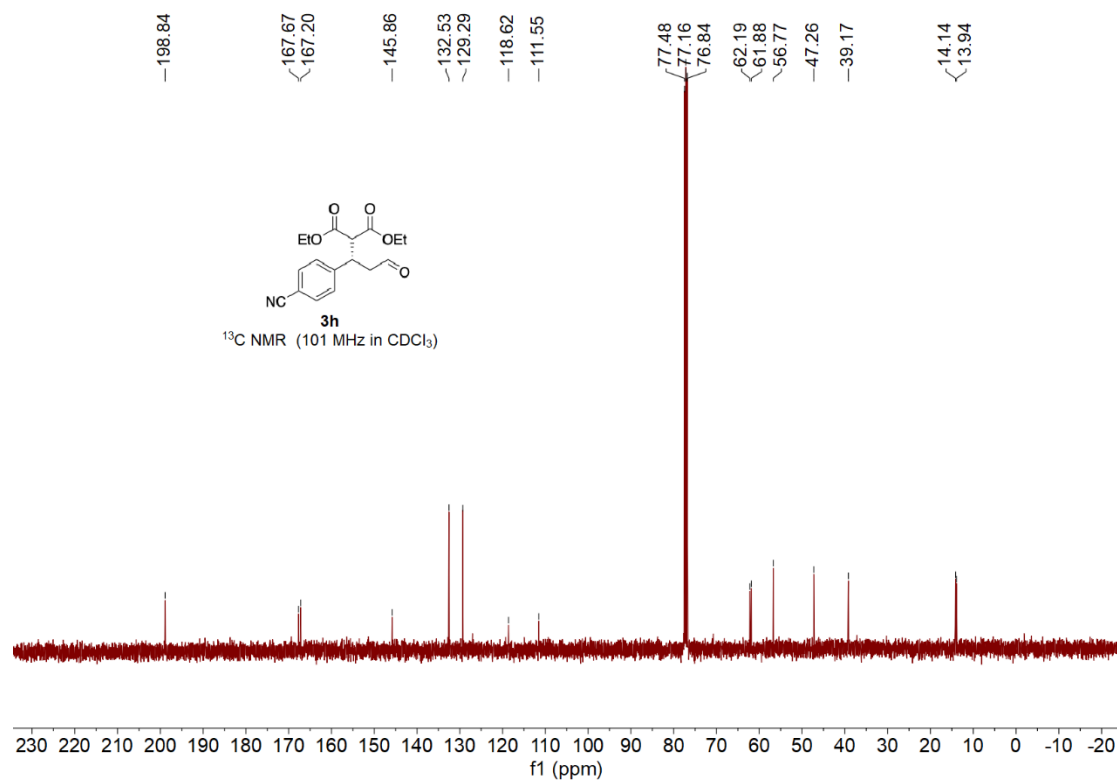

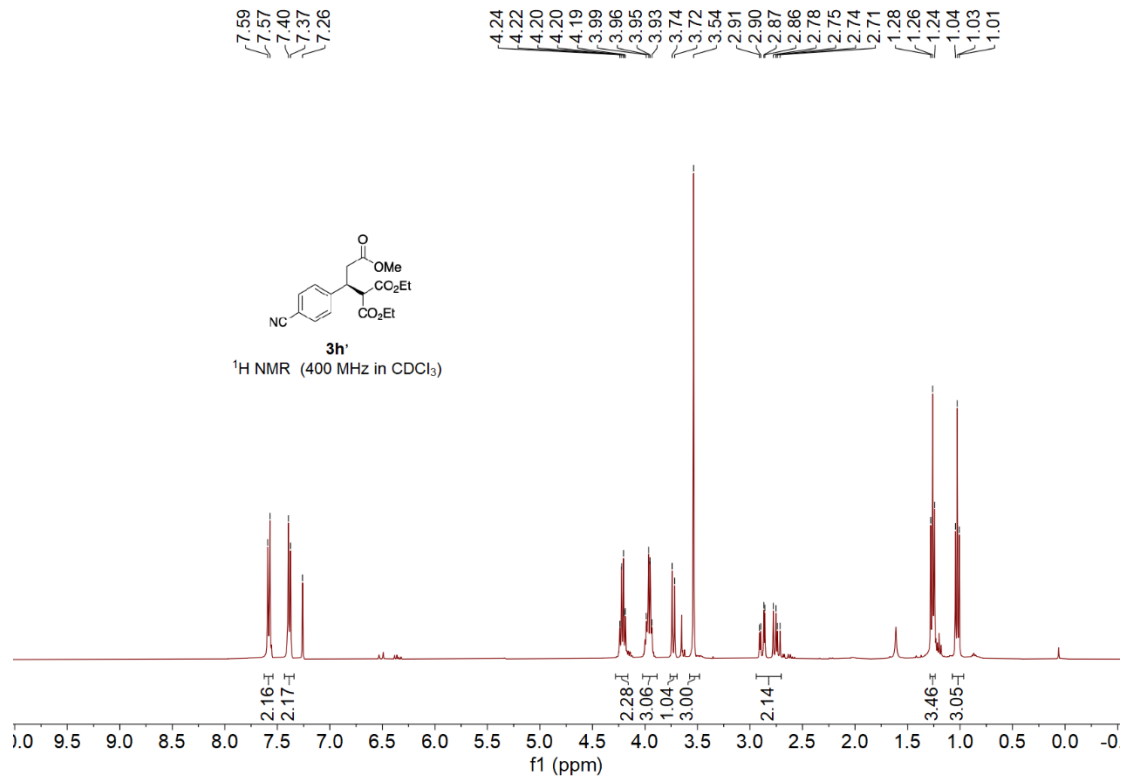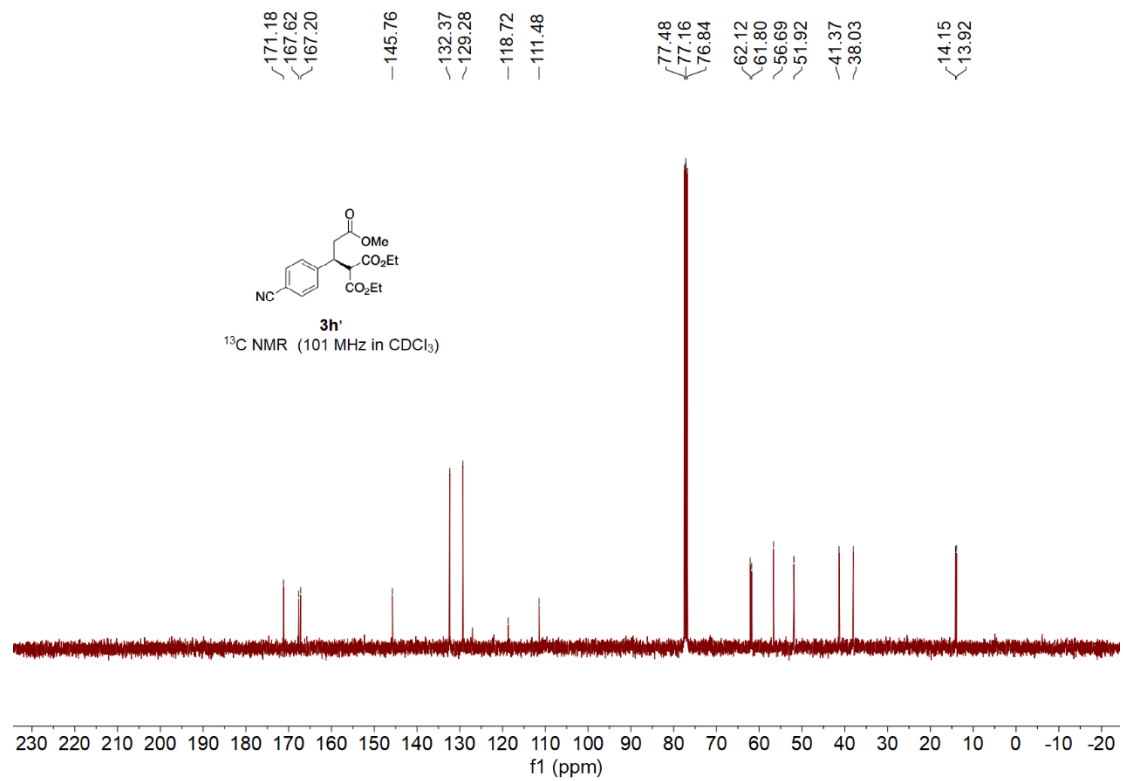



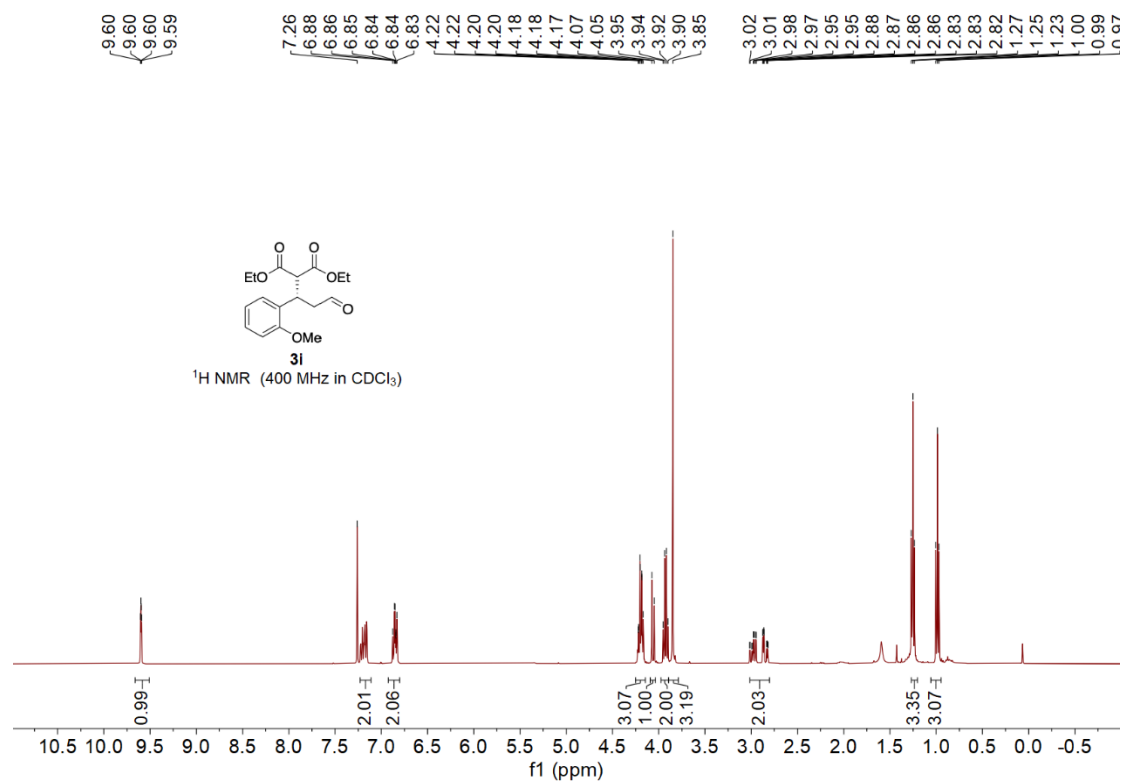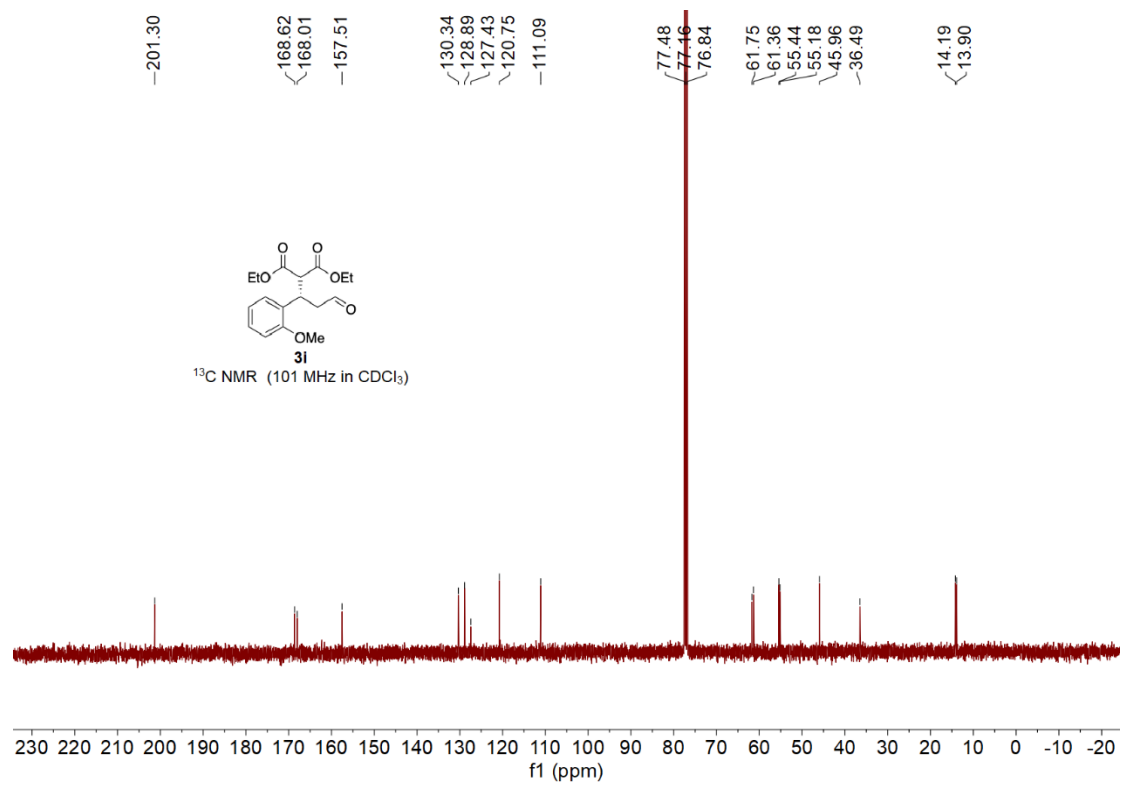

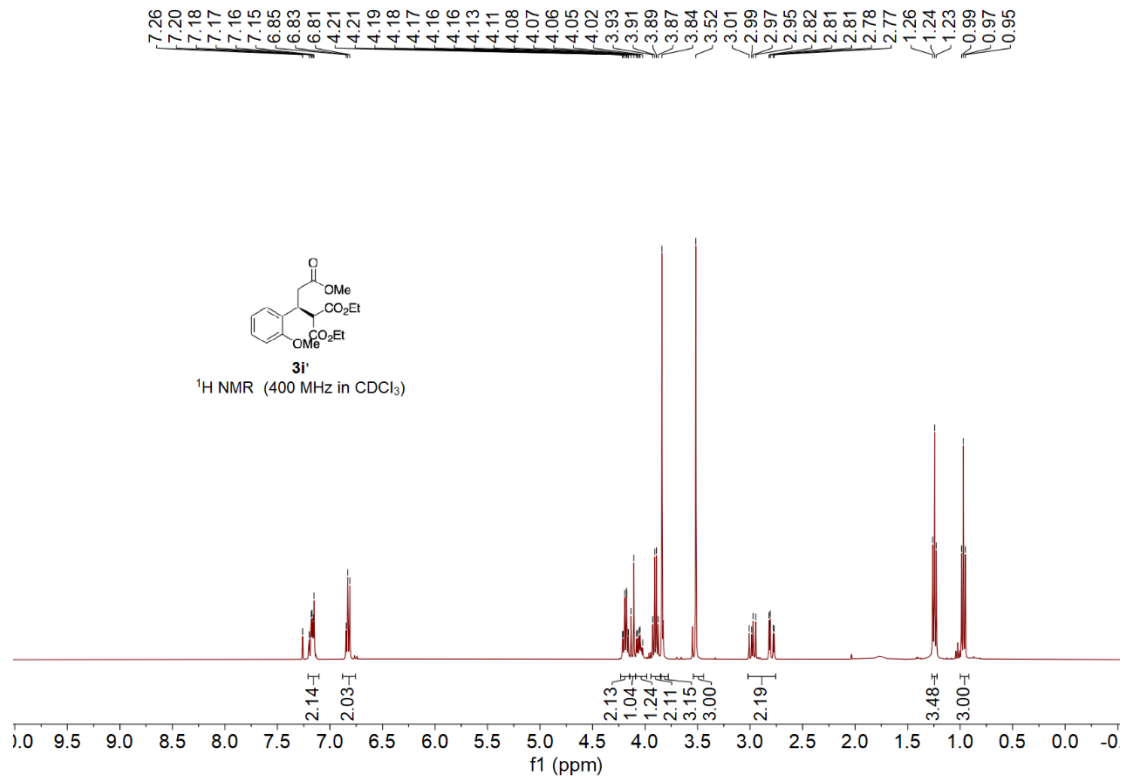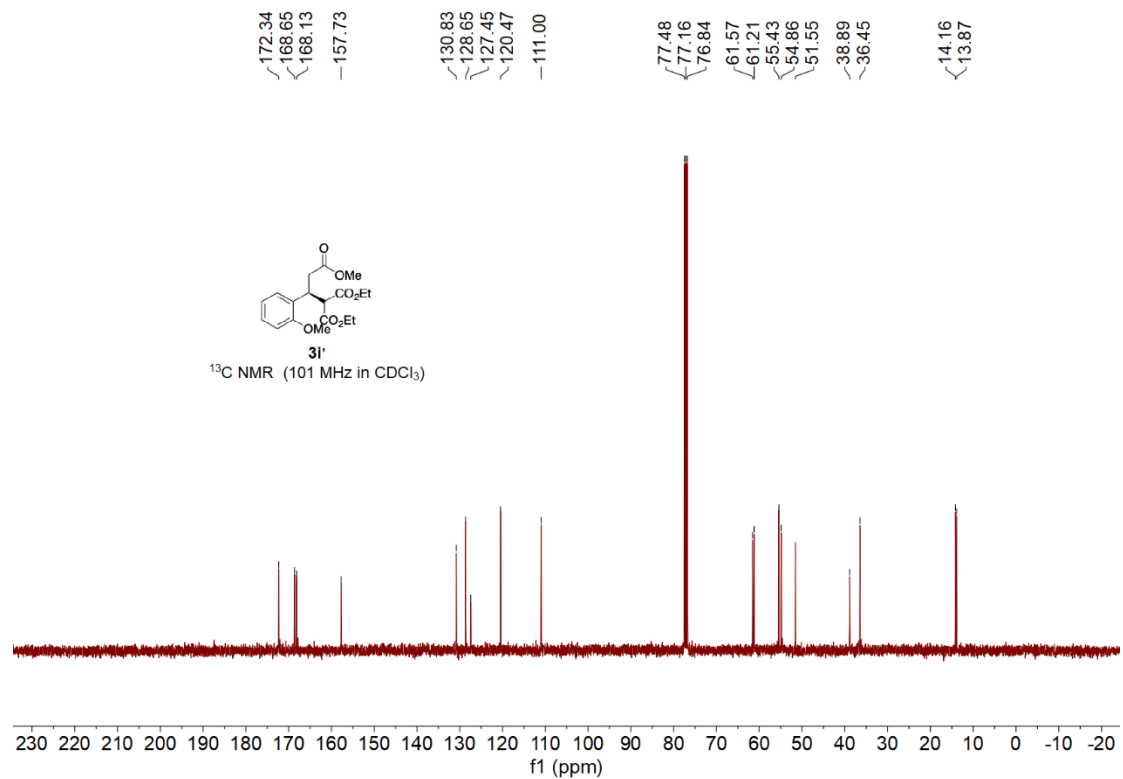

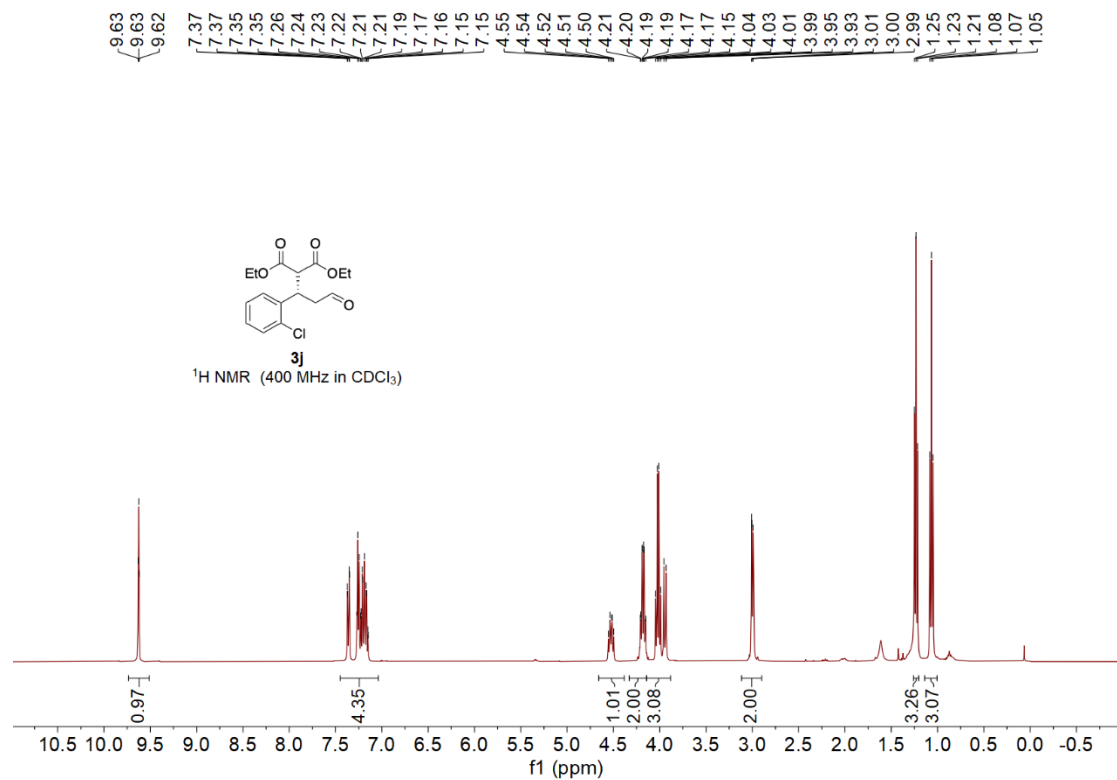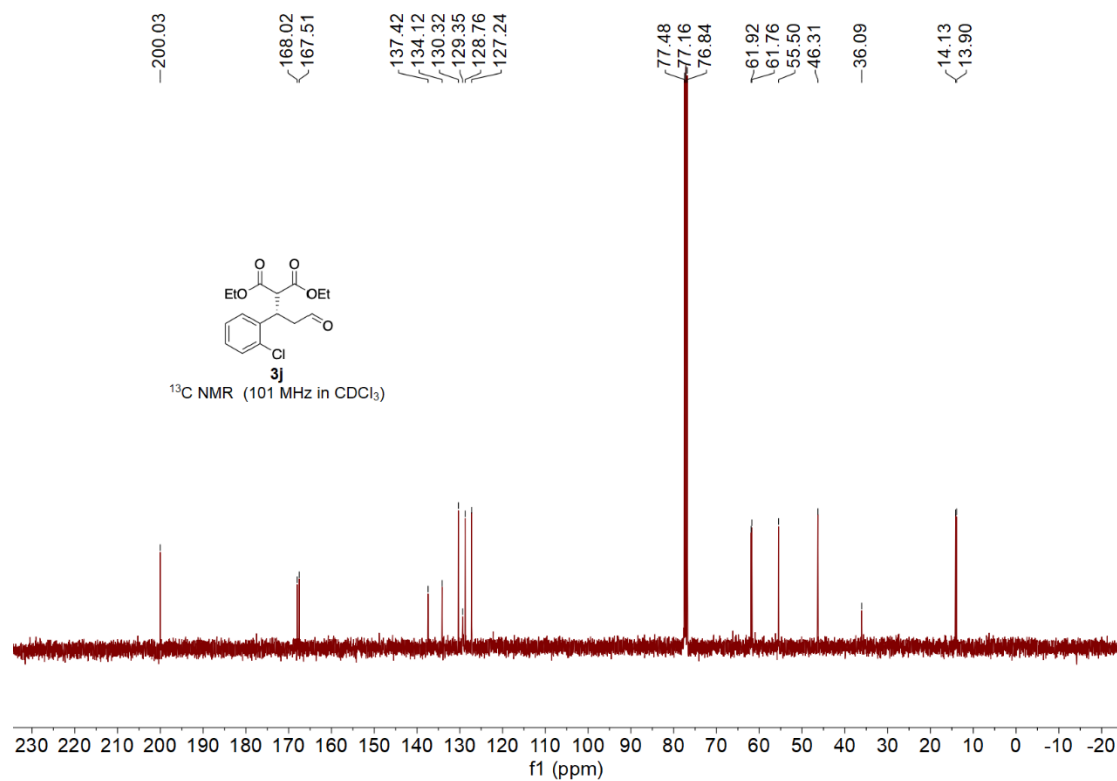

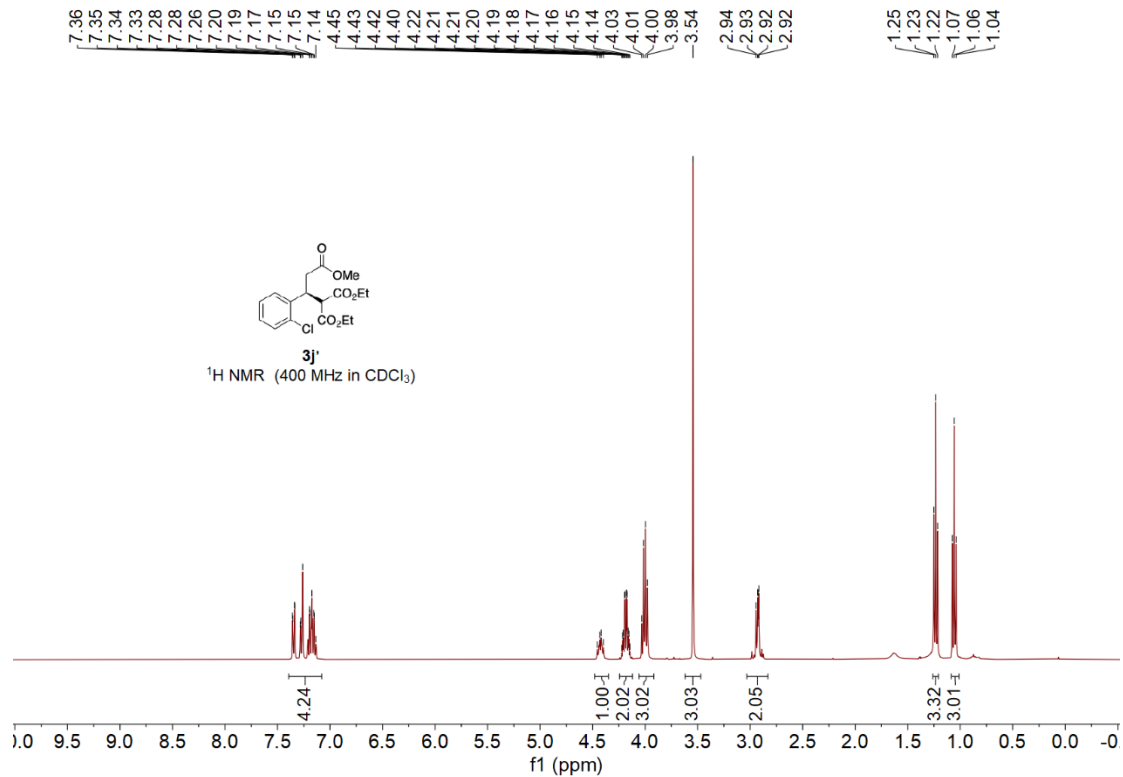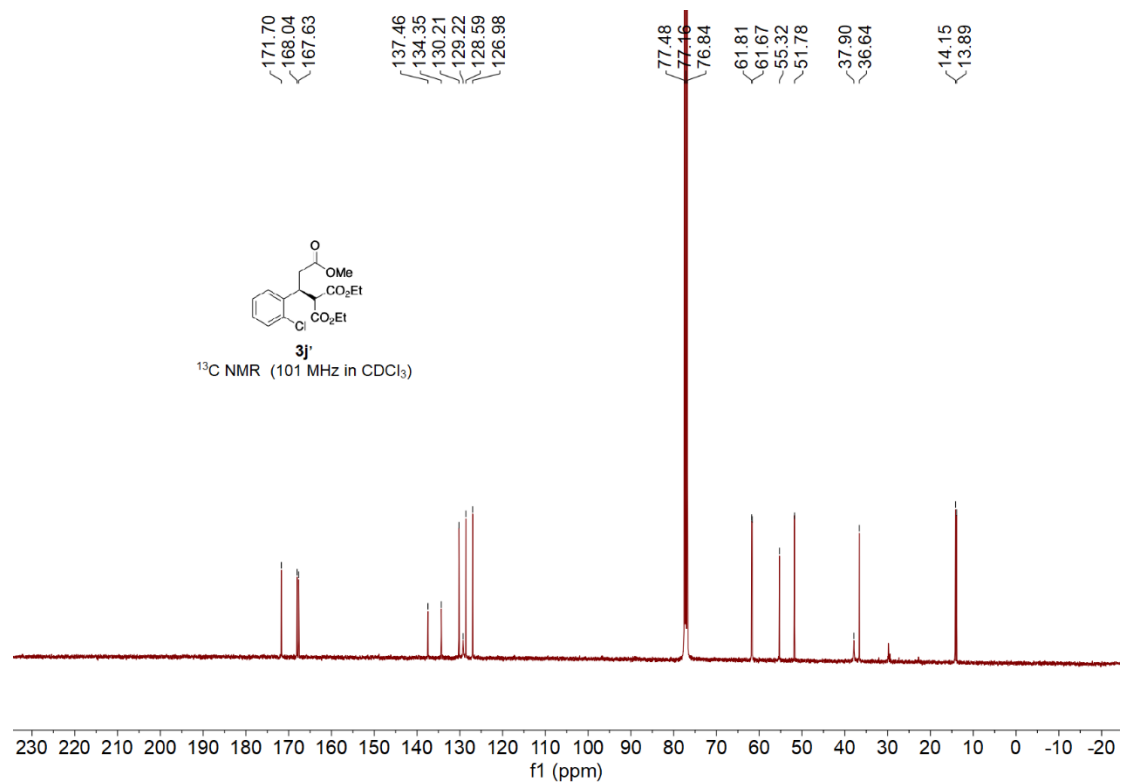

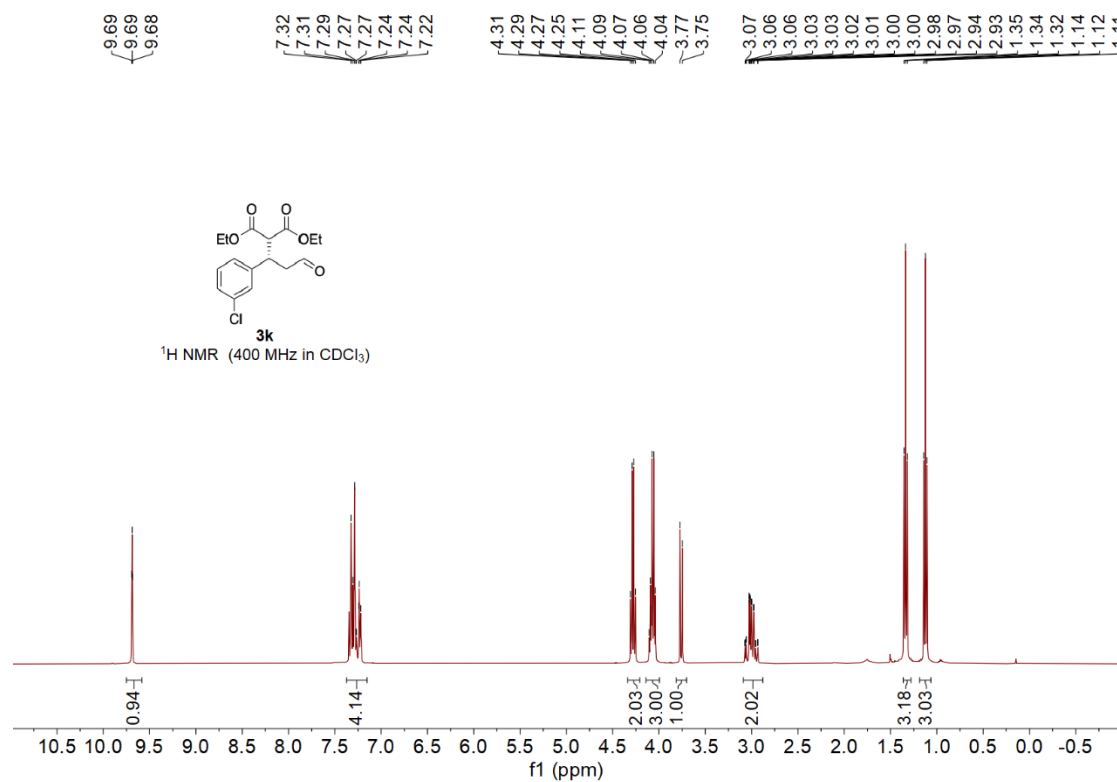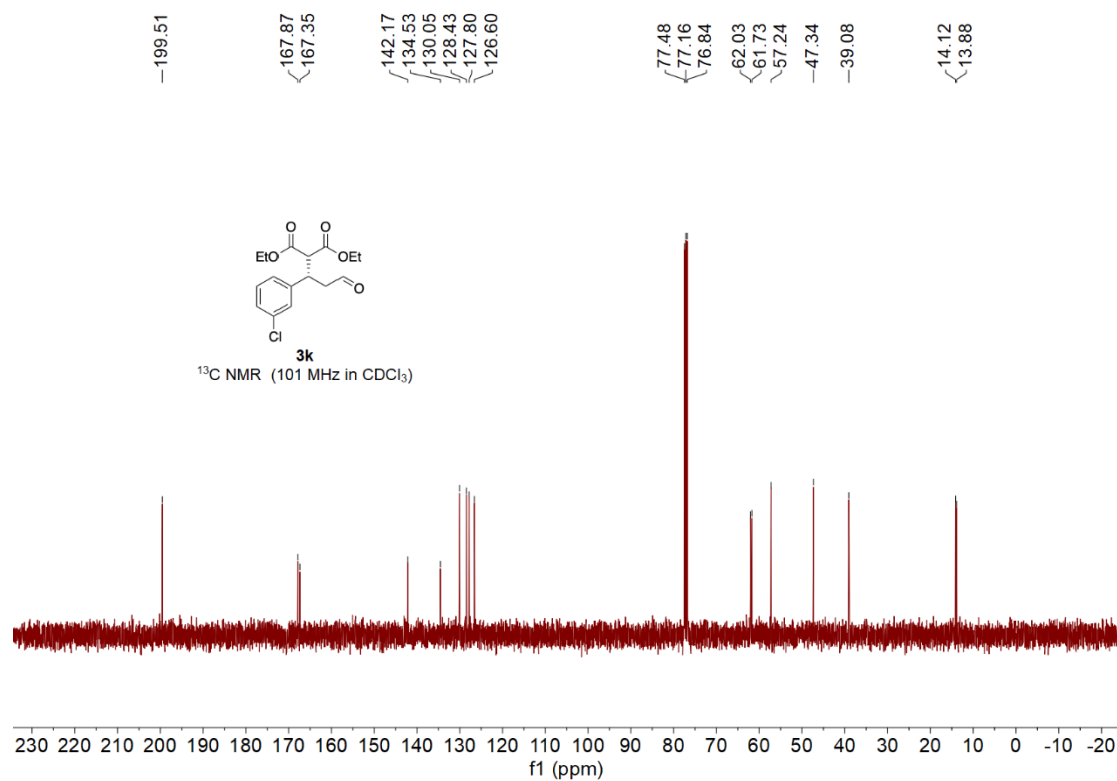

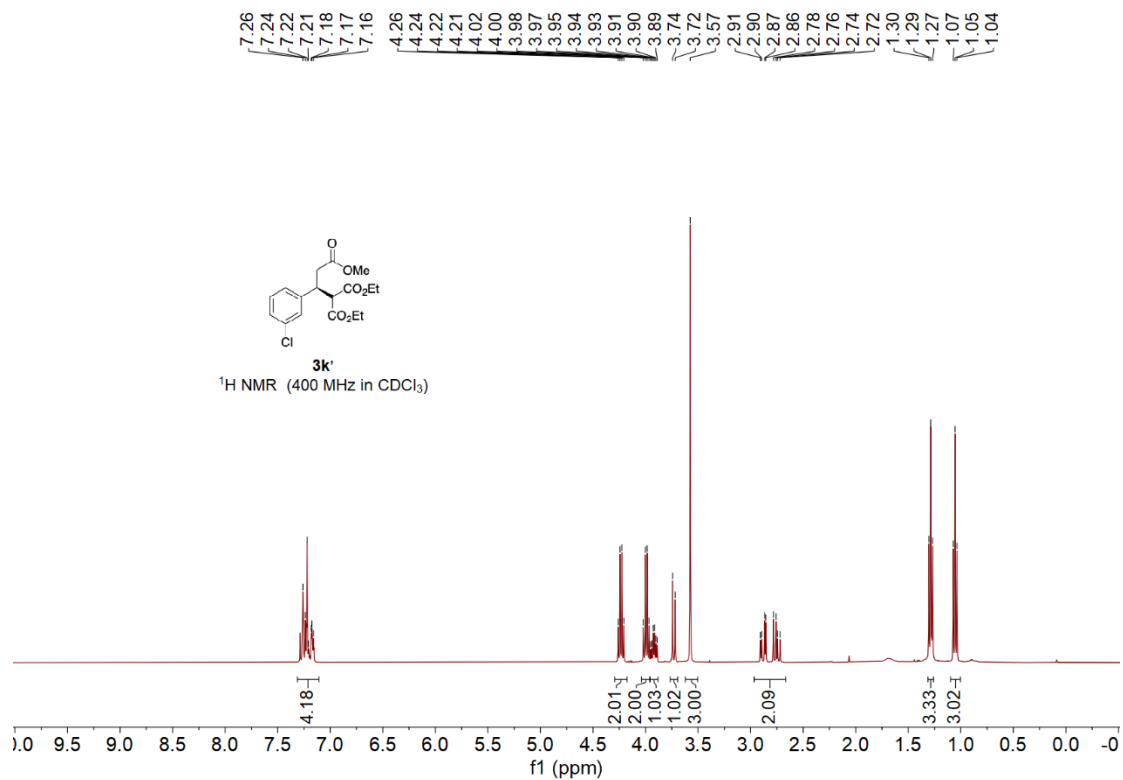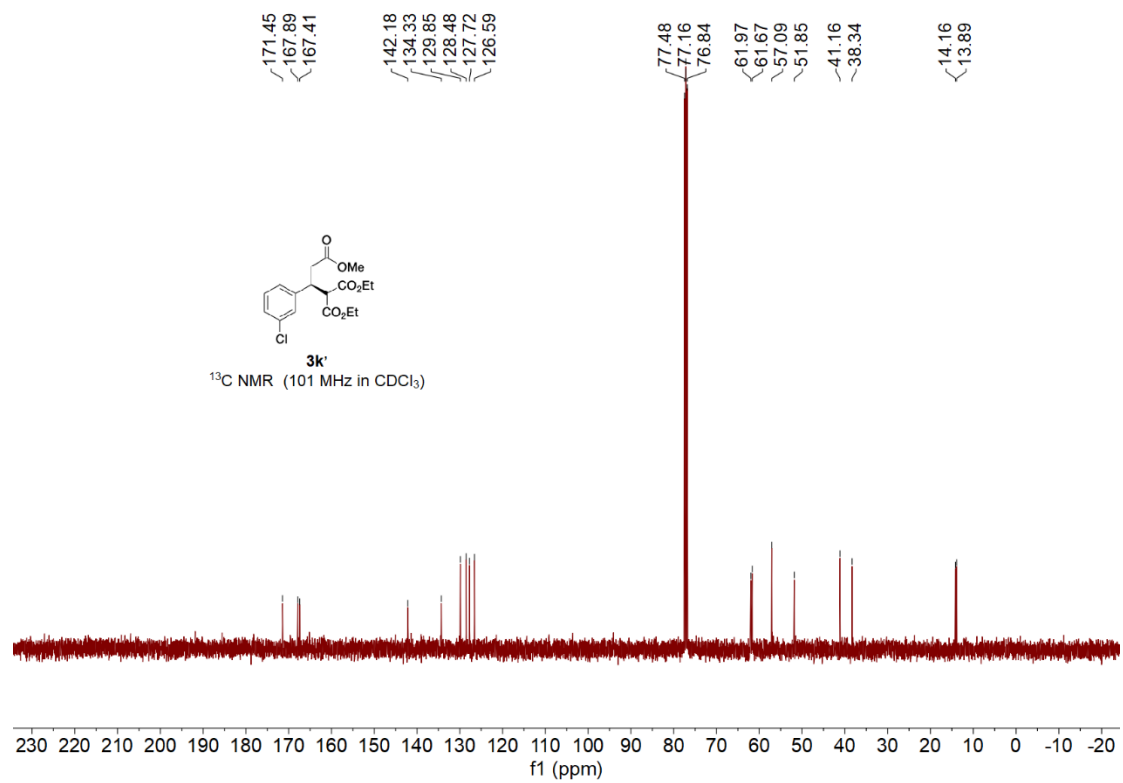

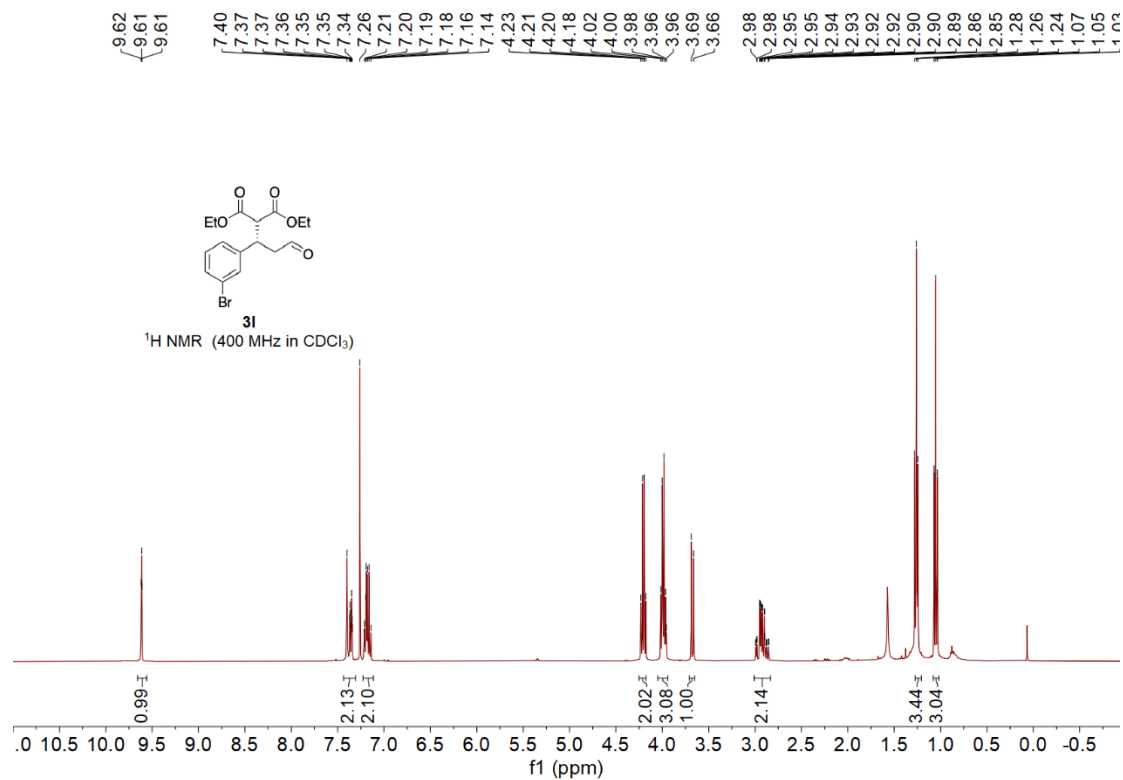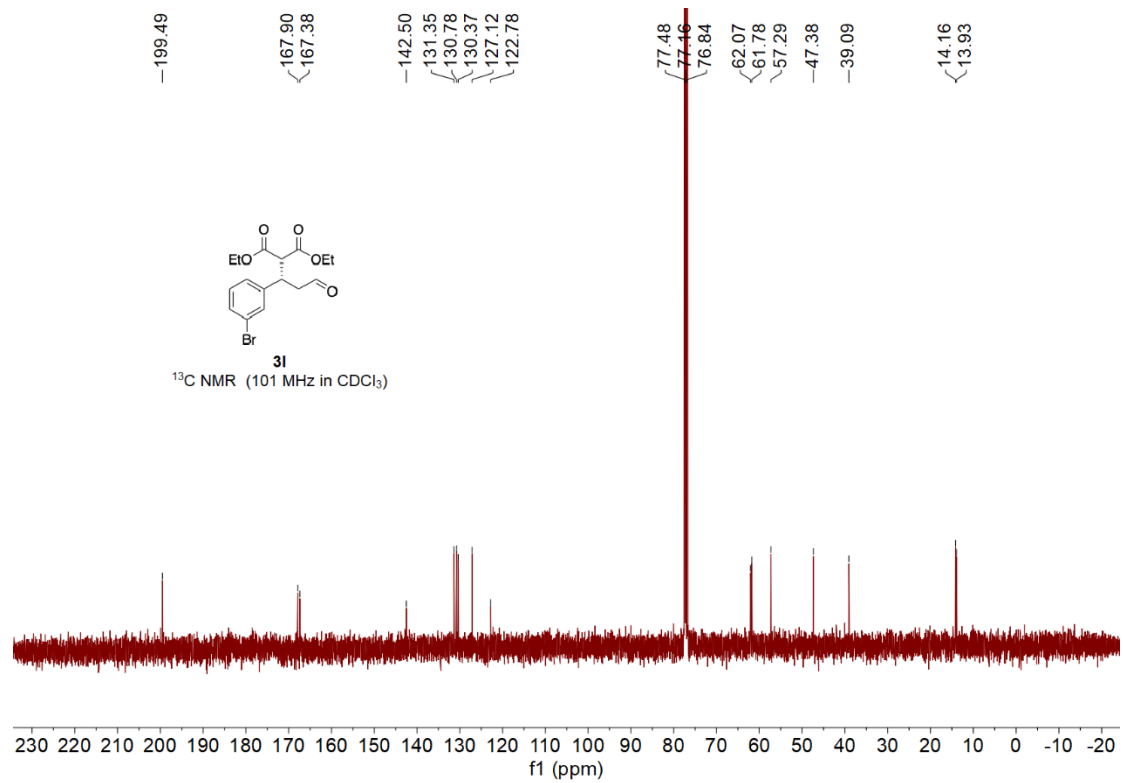

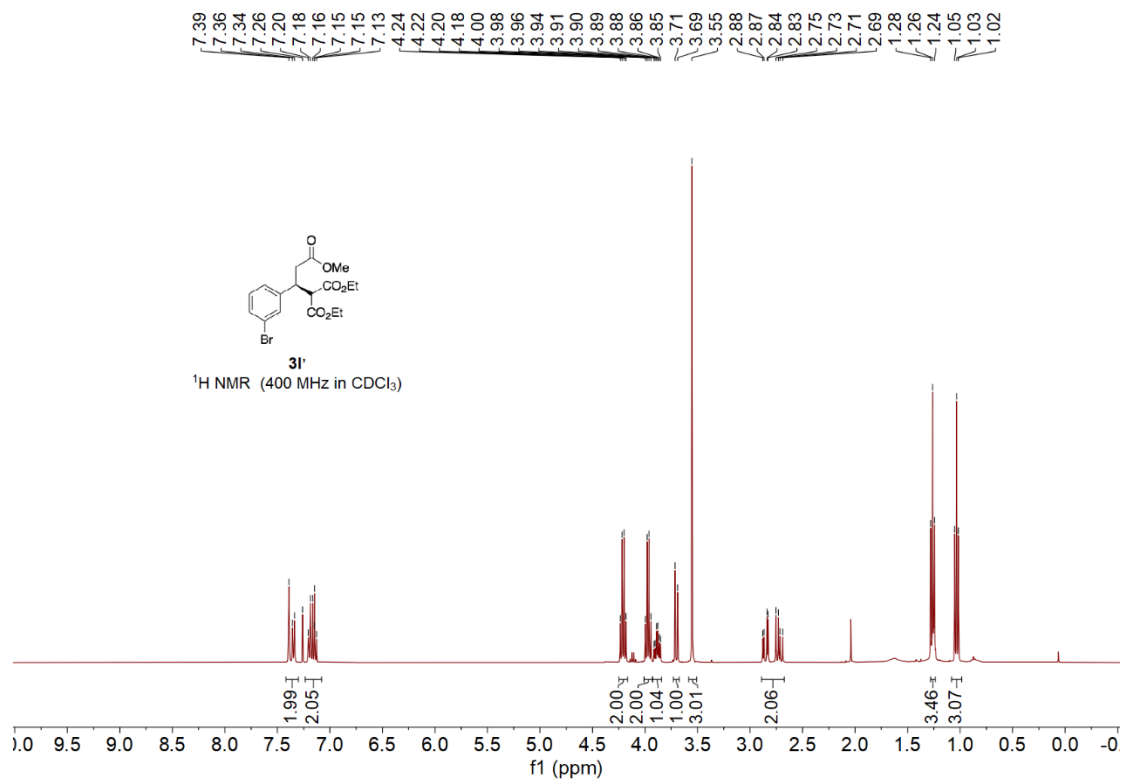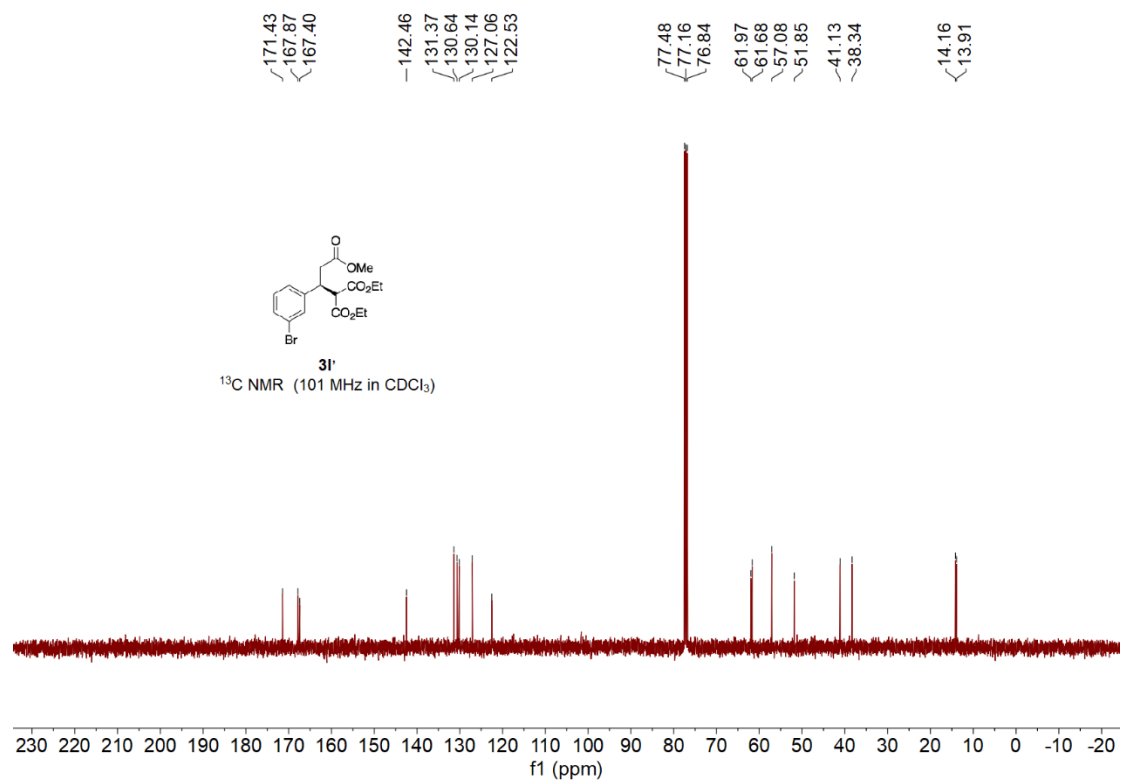



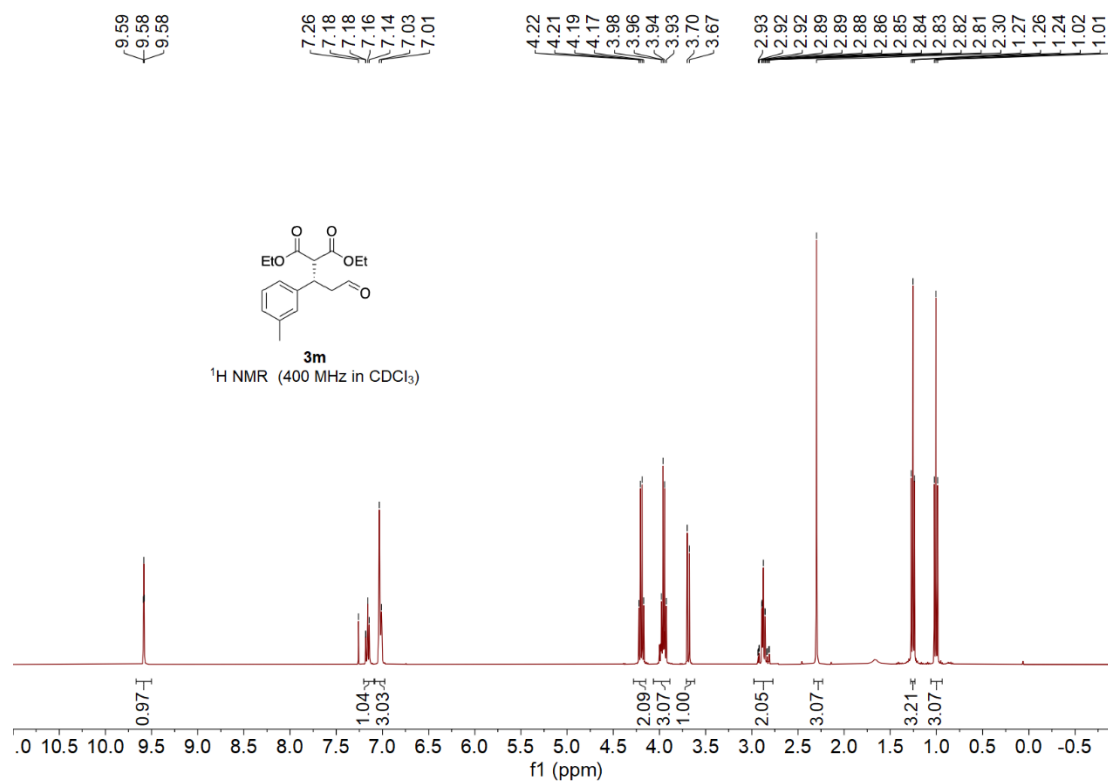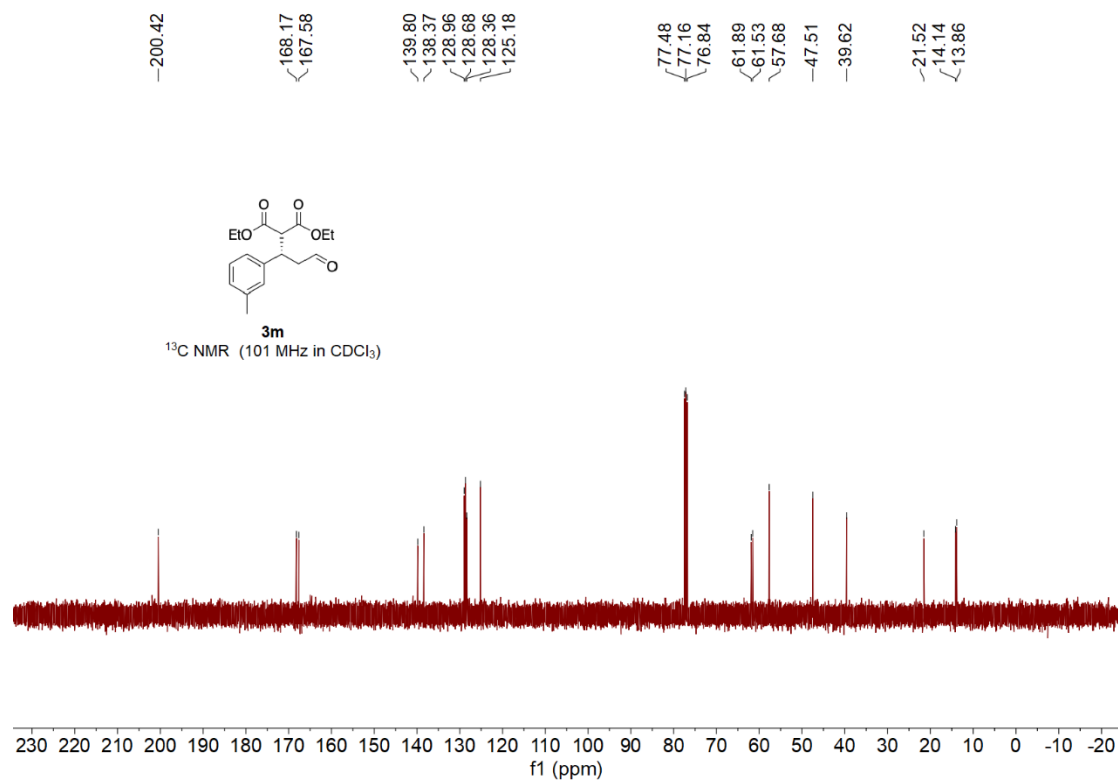

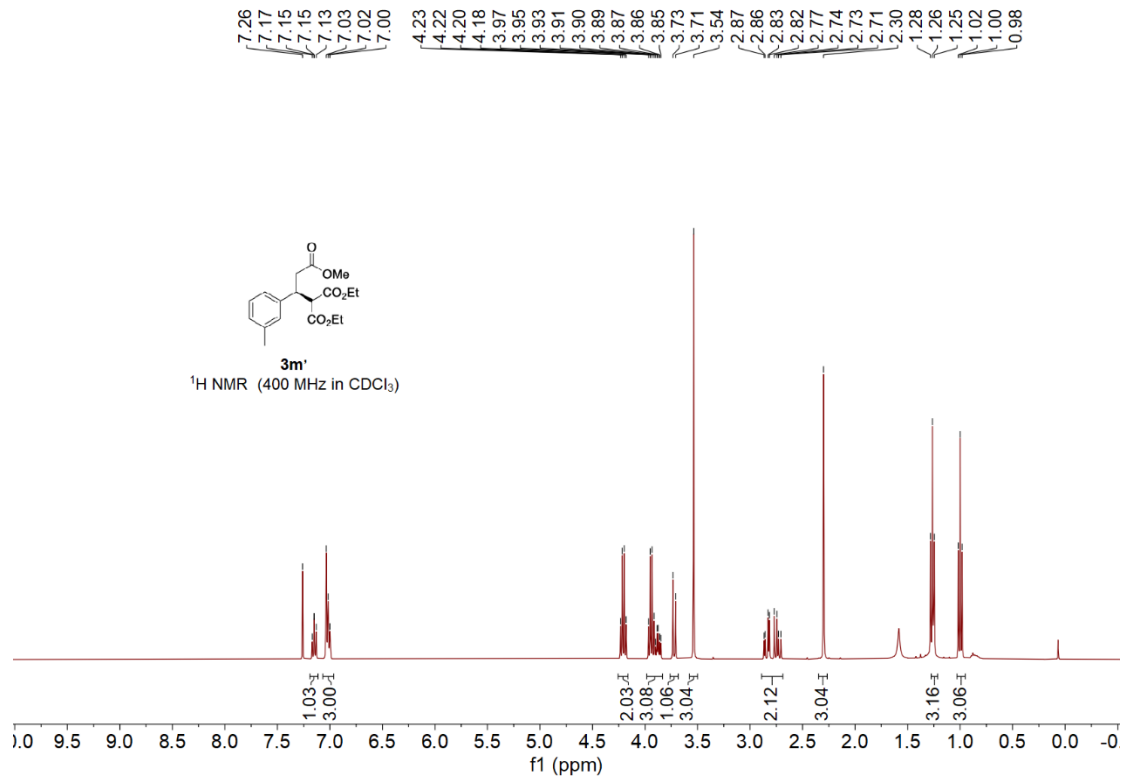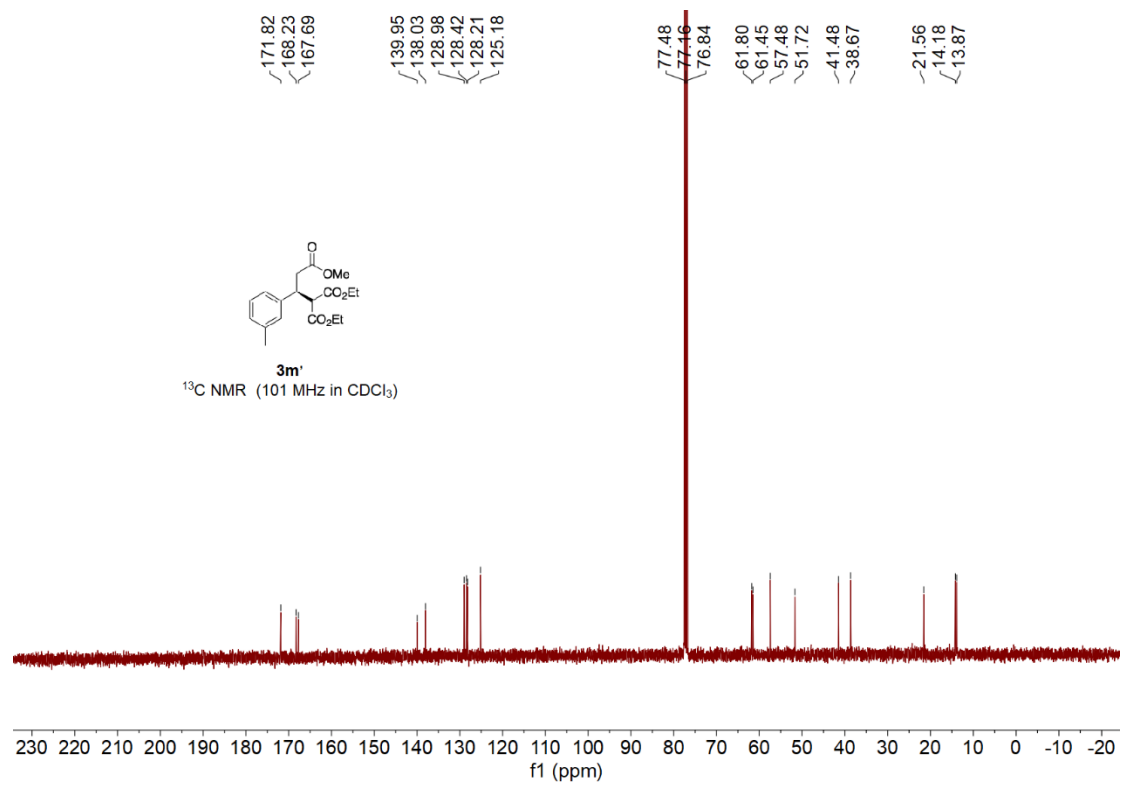

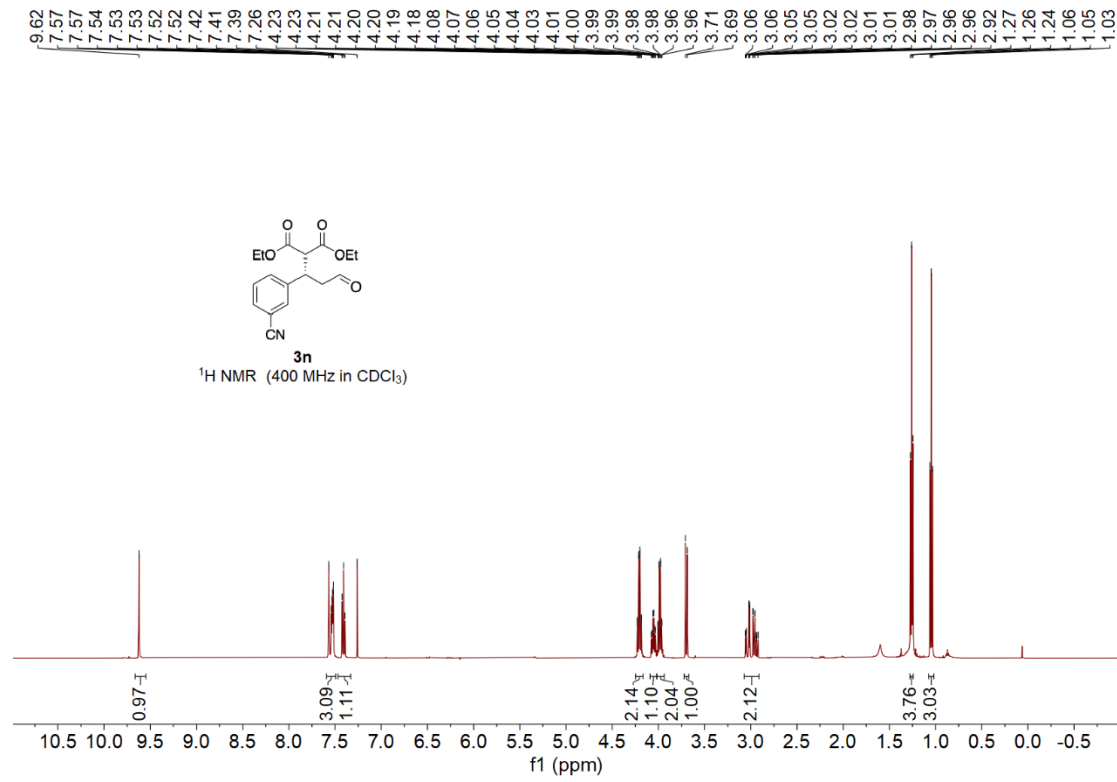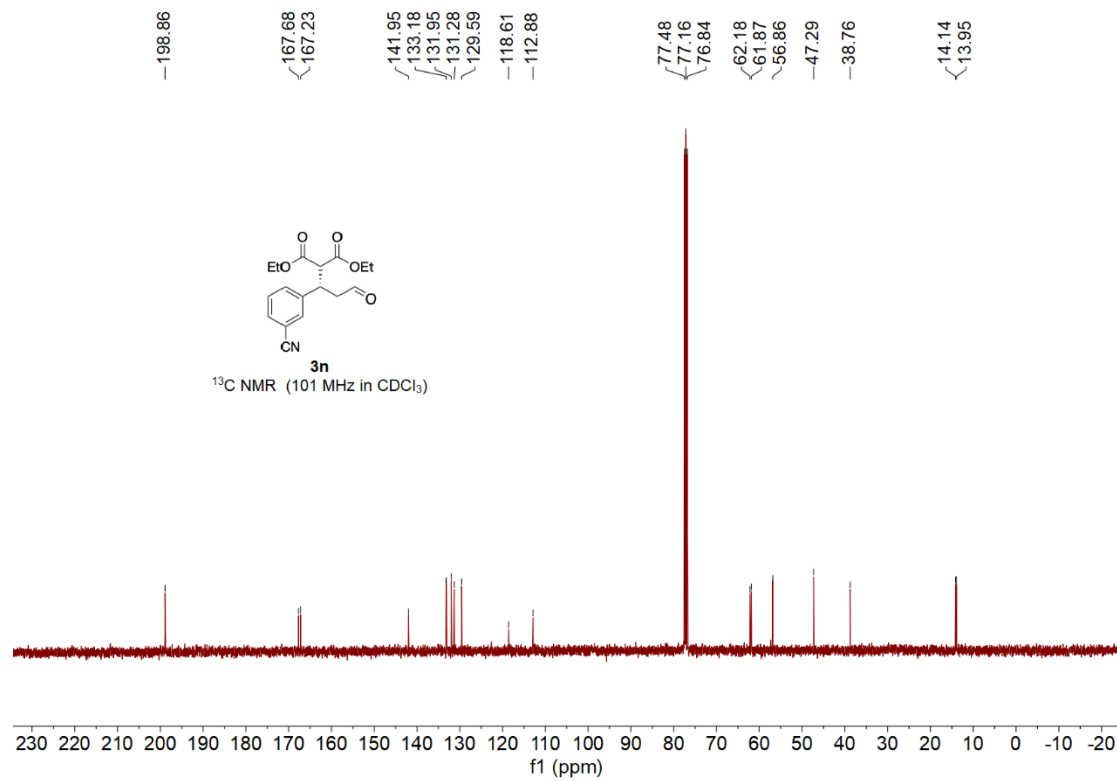

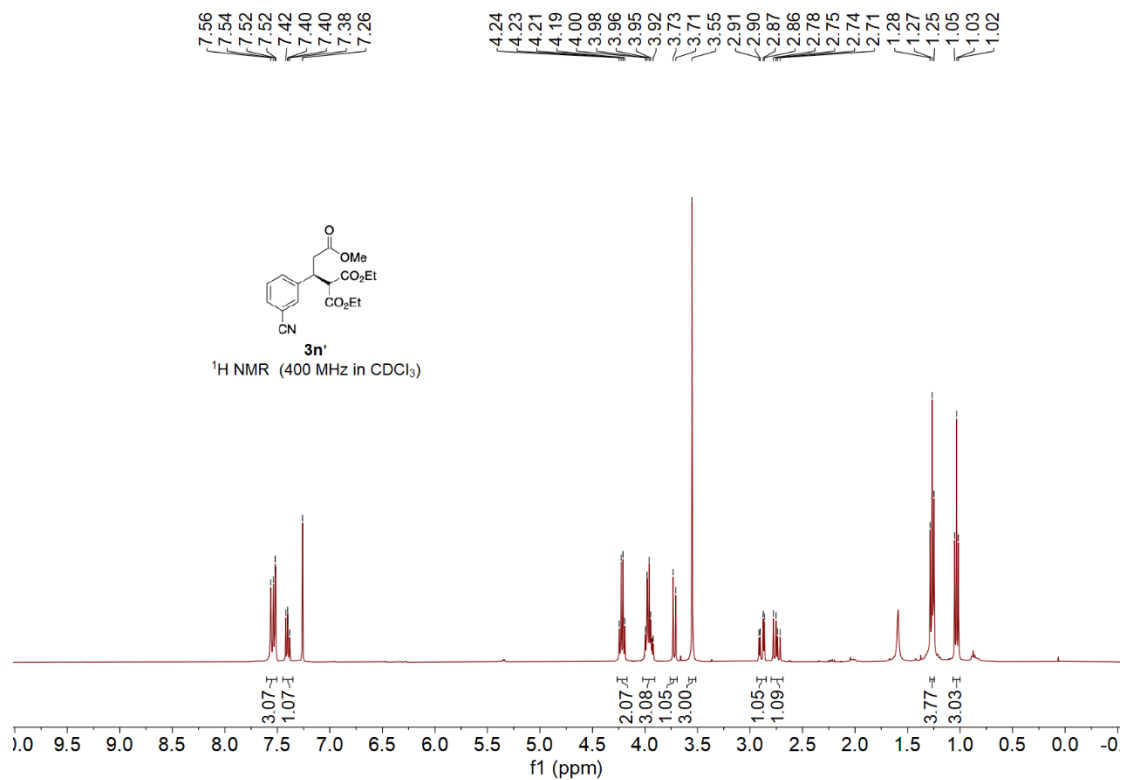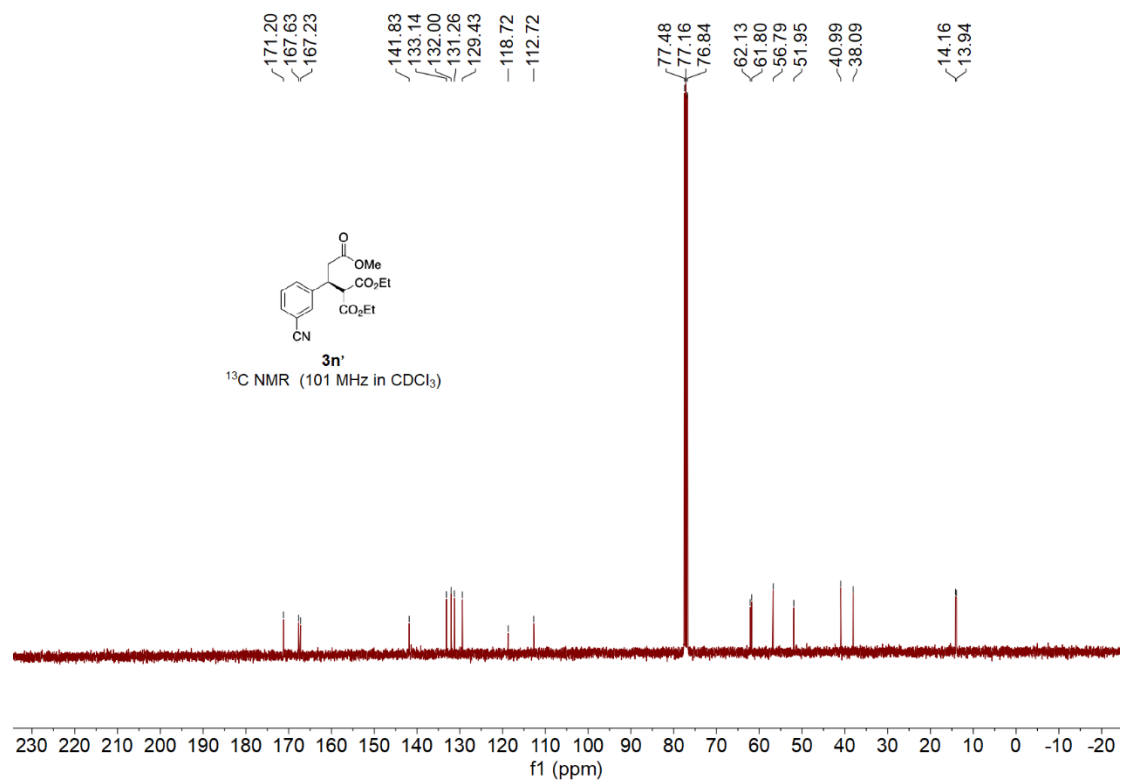

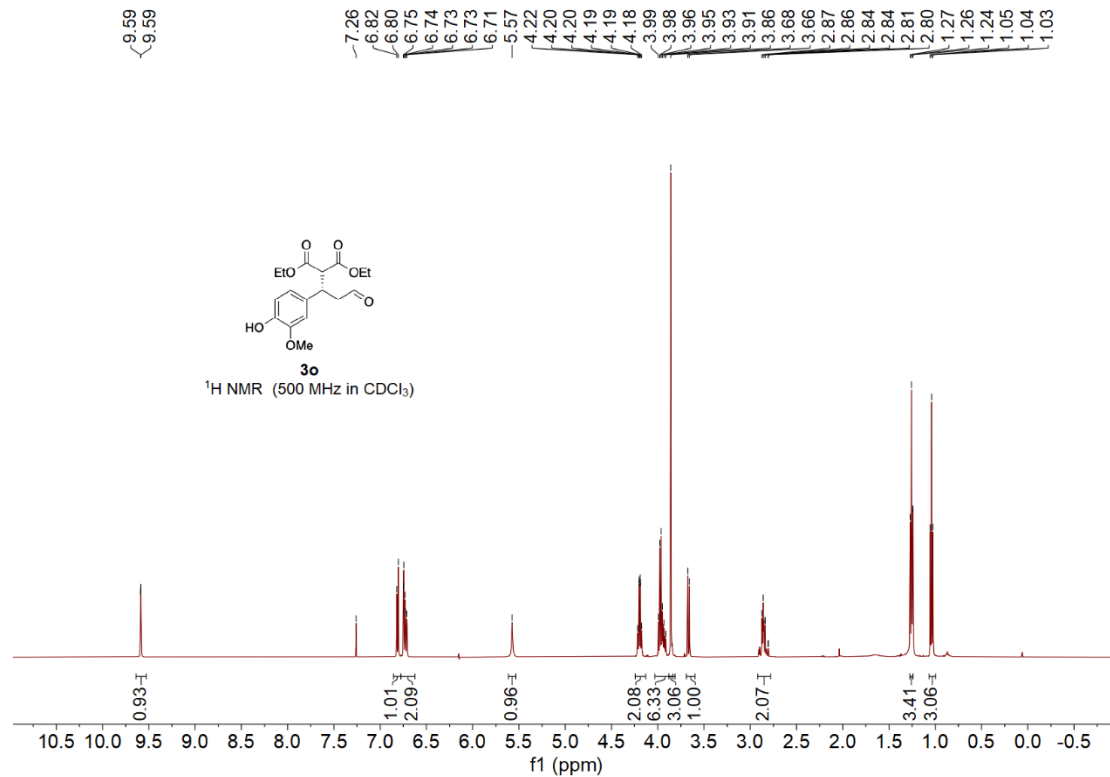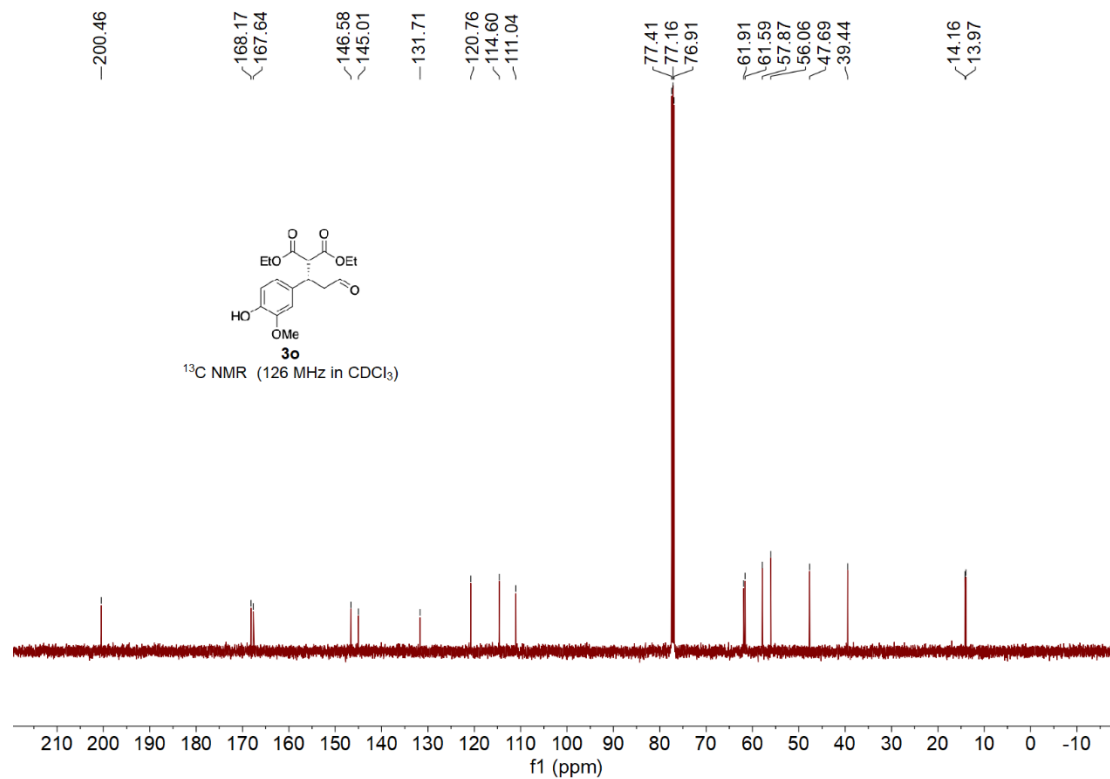

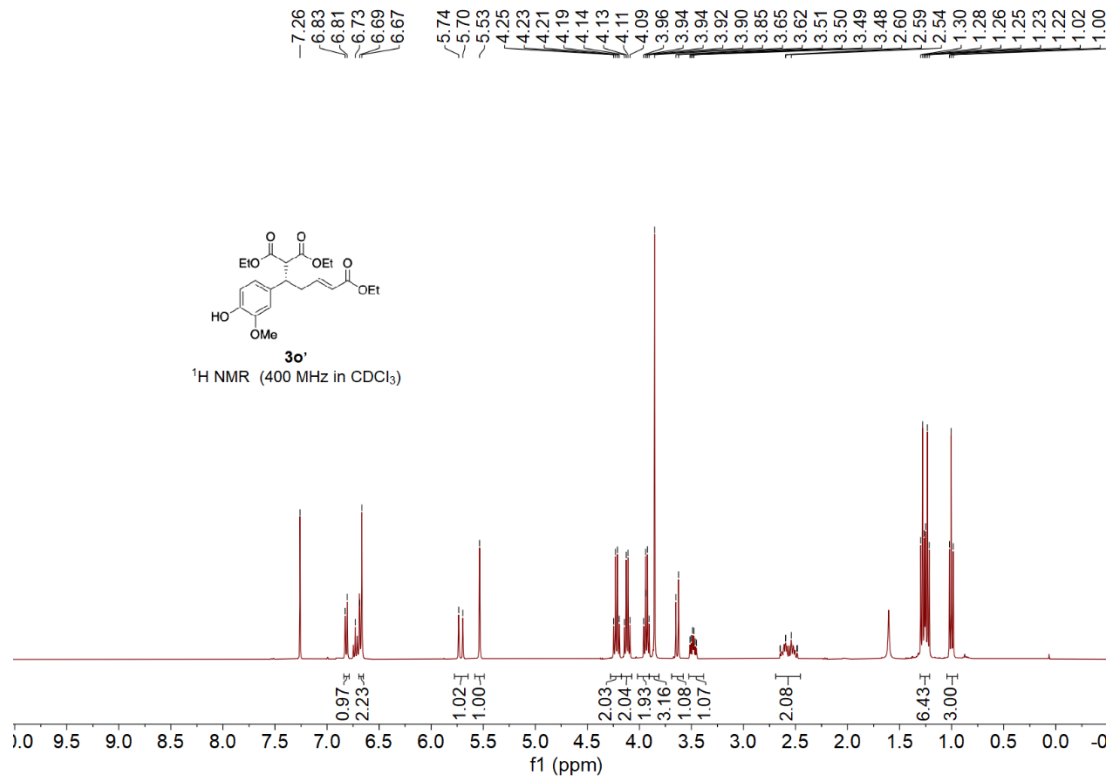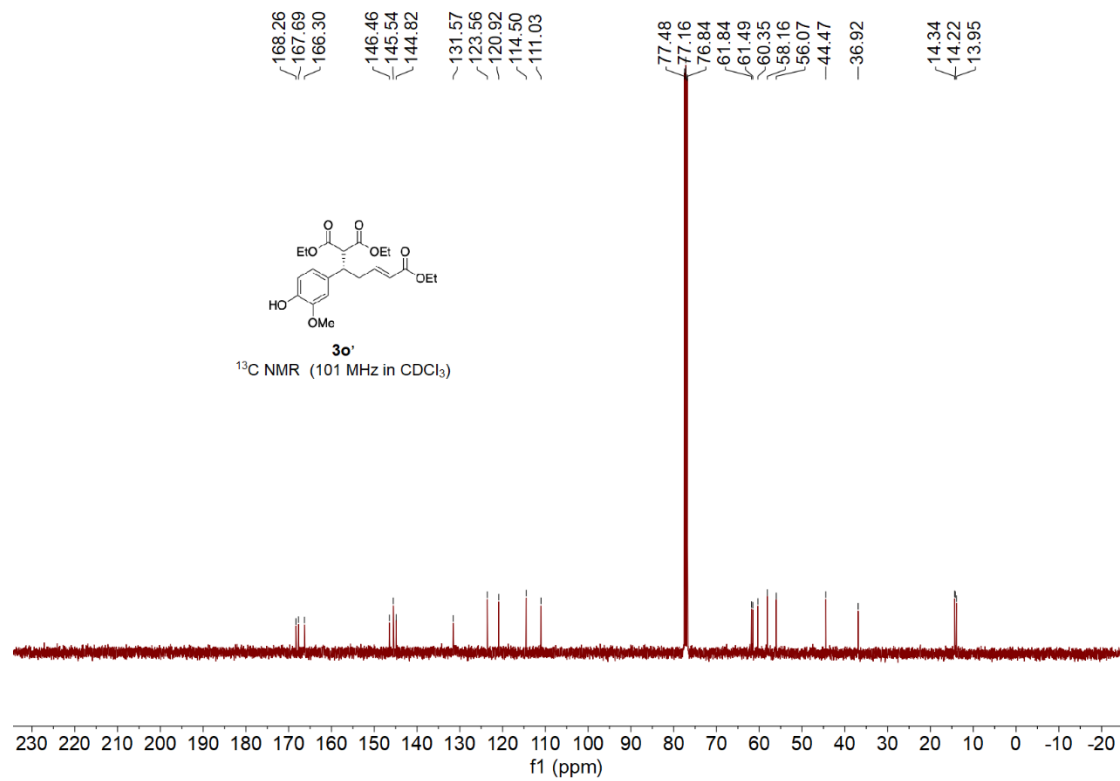

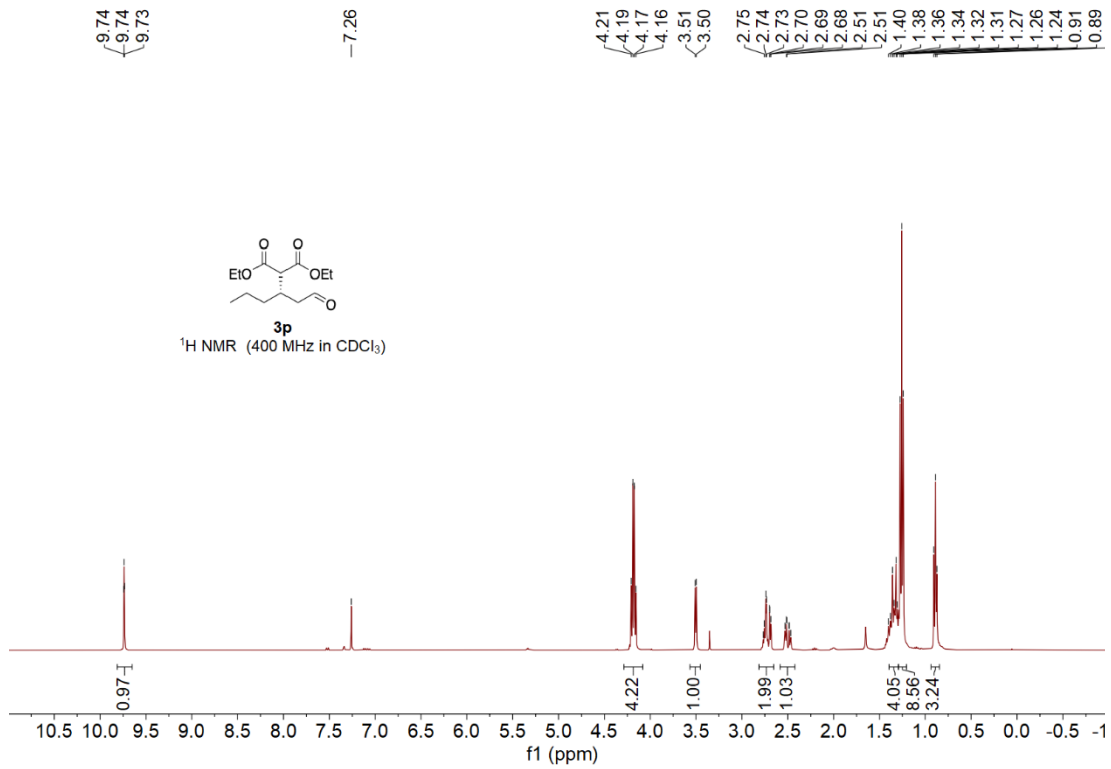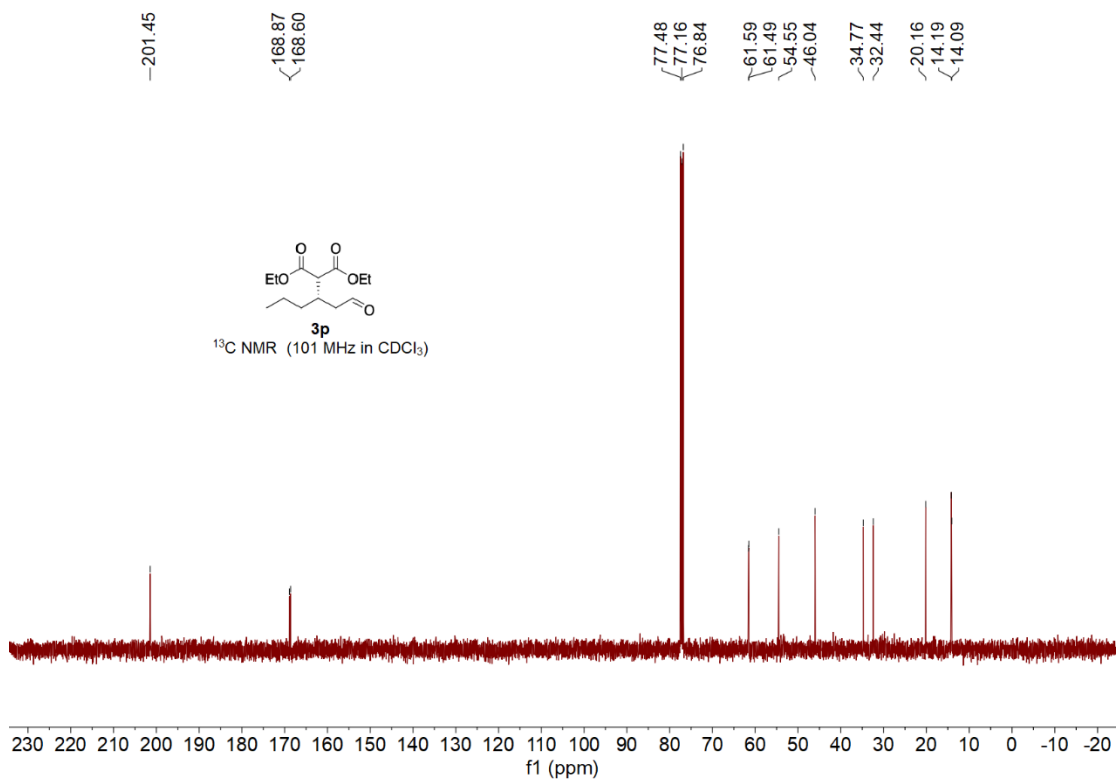

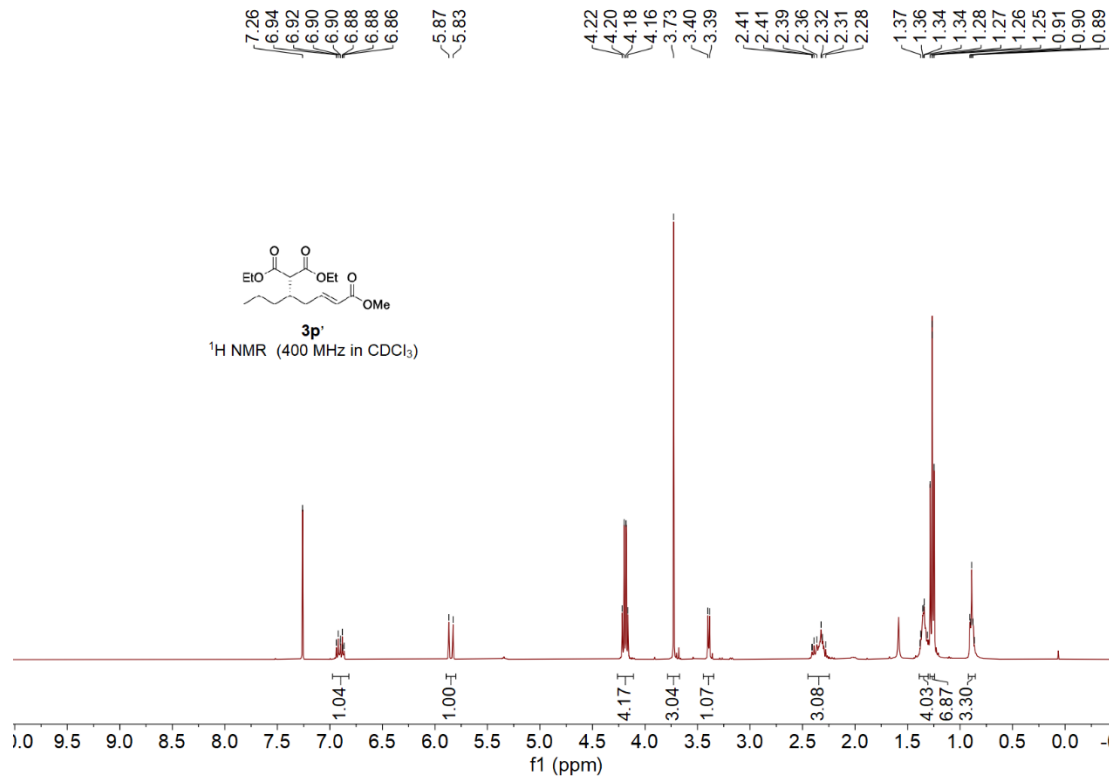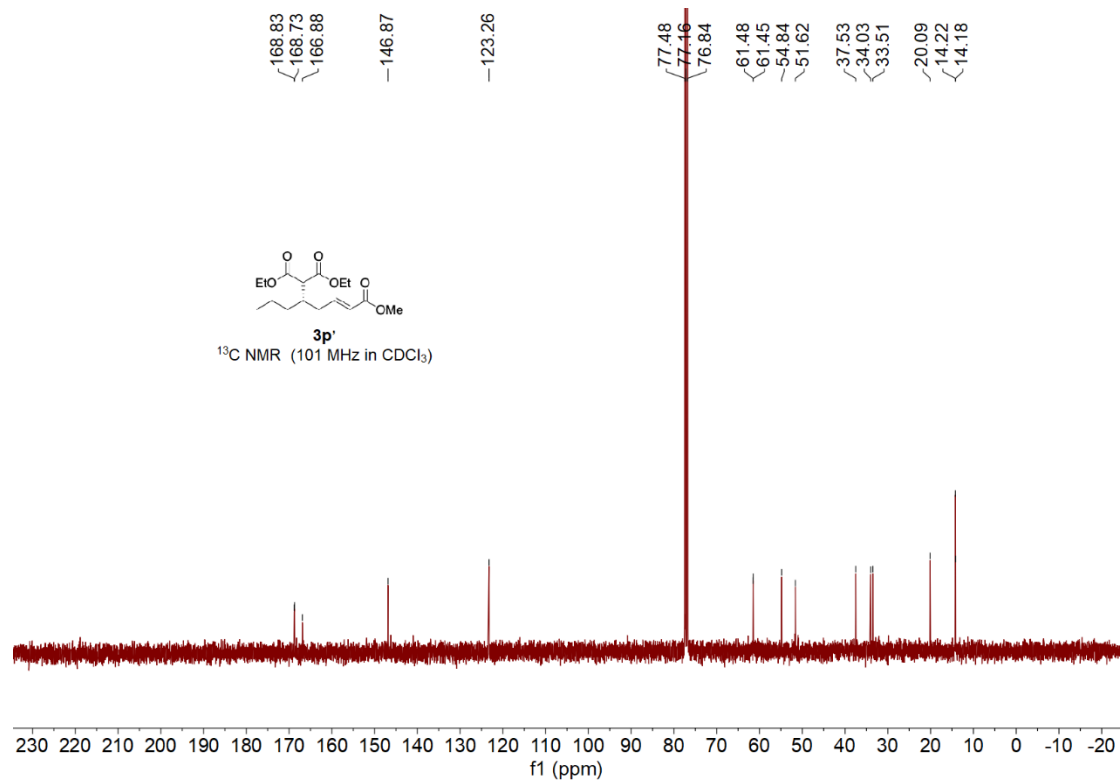



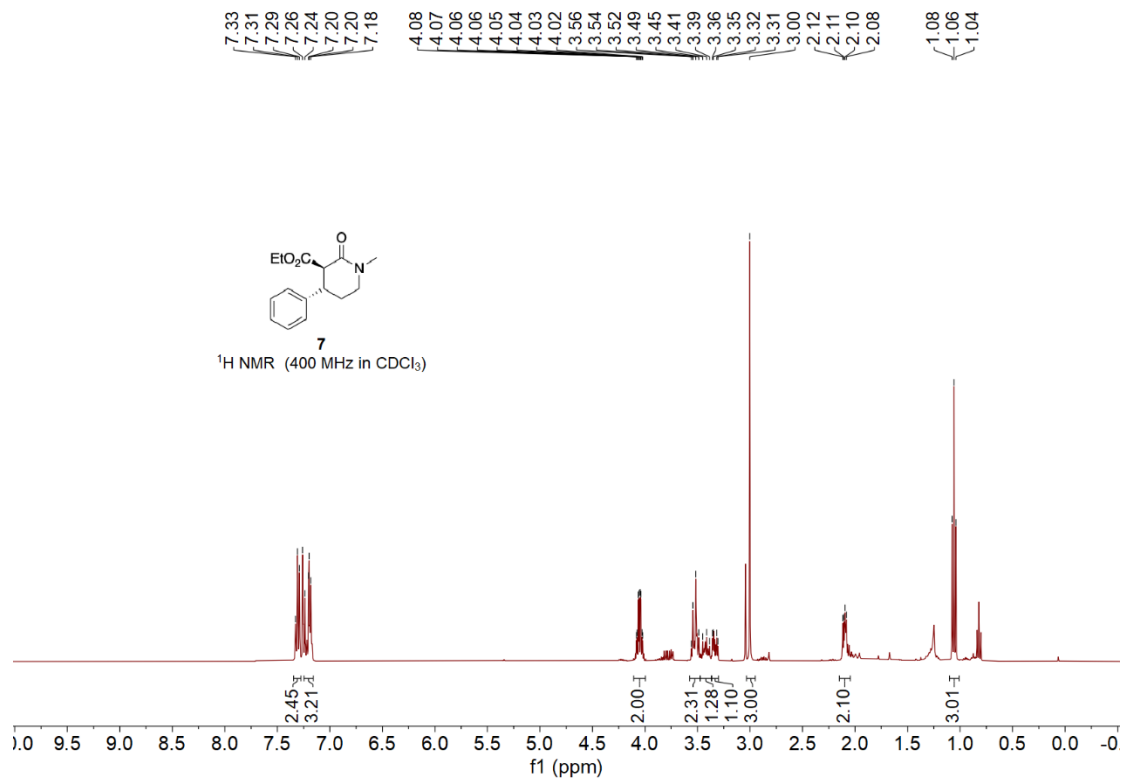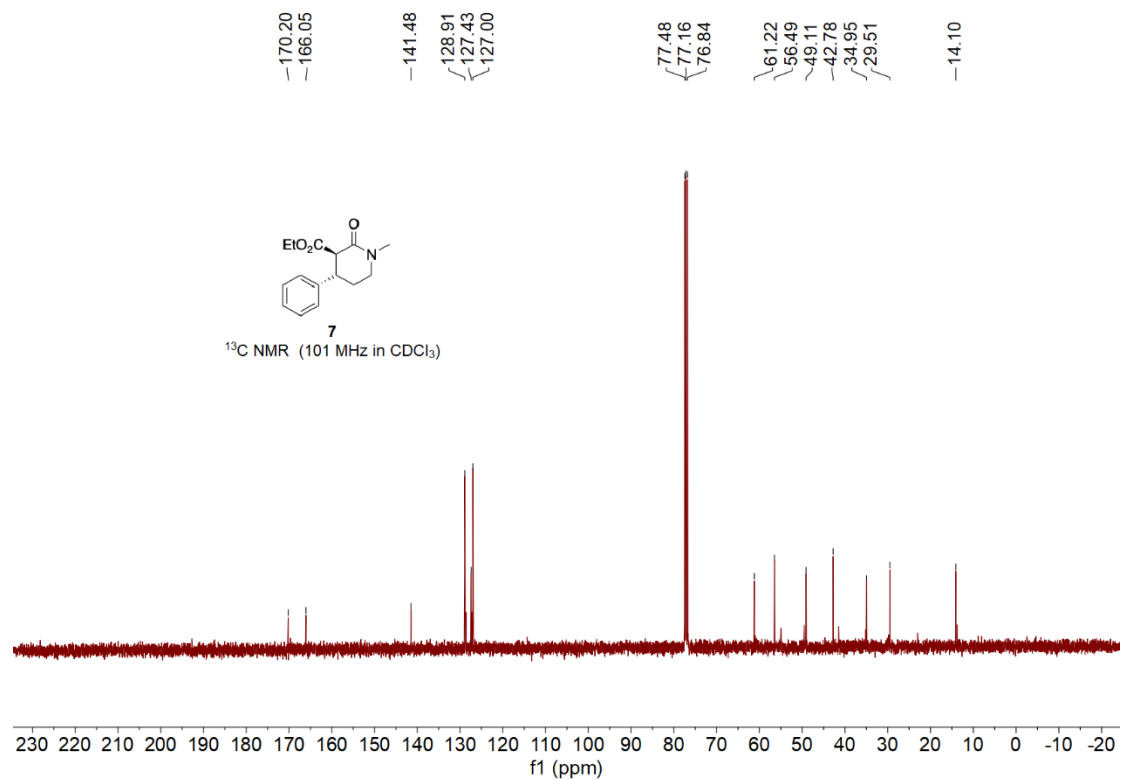

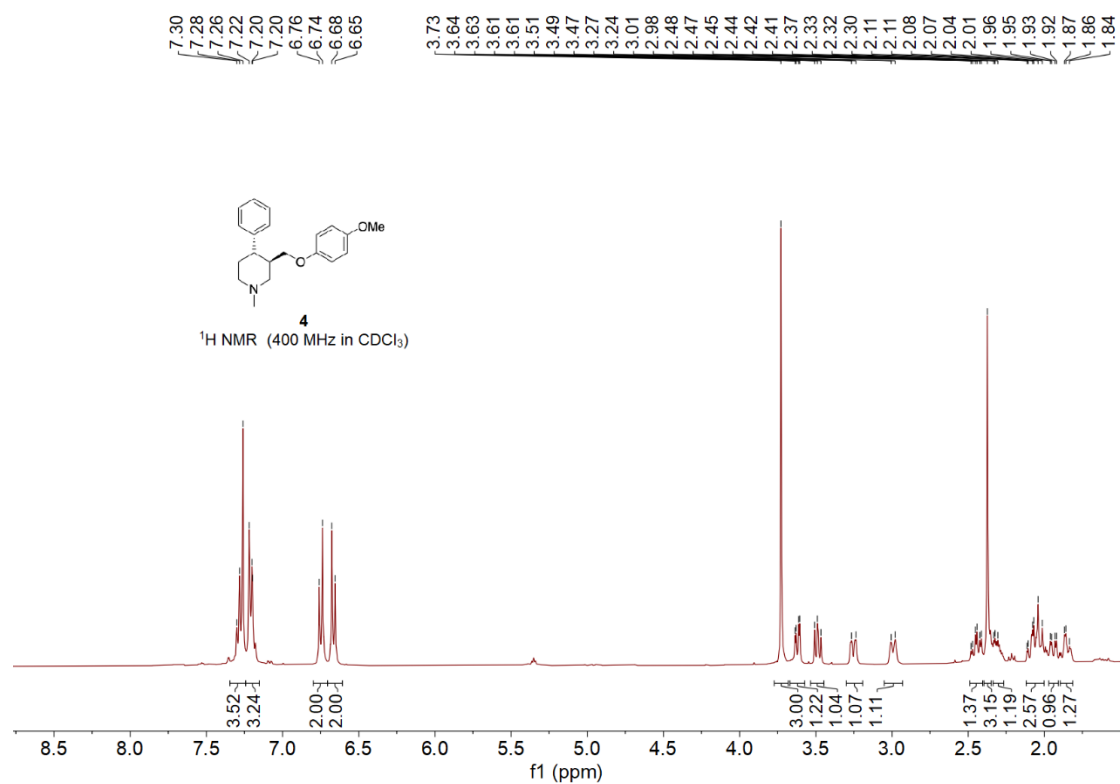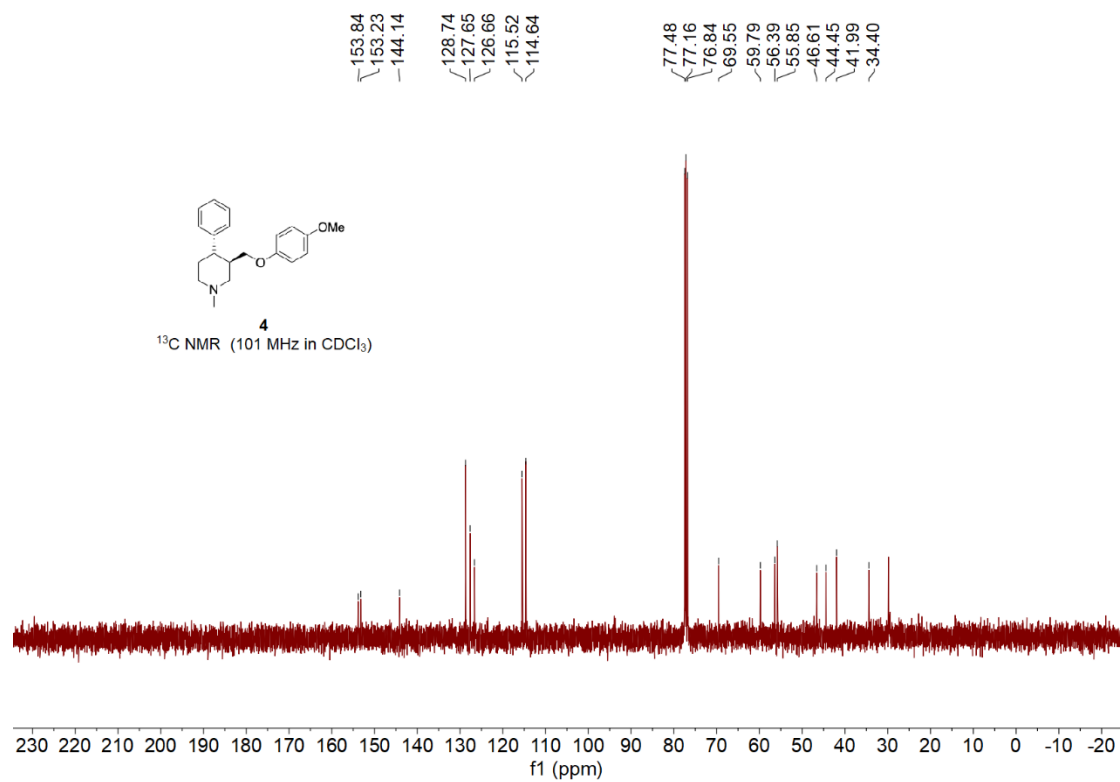

Supplement: d3ob00111c1.pdf [file d3ob00111c1.pdf]
